# Supplementary material for: Comparative analysis of fatty acid metabolism based on transcriptome sequencing of wild and cultivated Ophiocordyceps sinensis
Source: PeerJ. 2021 Jul 1;9:e11681. doi: 10.7717/peerj.11681 (PMC8255070; doi:10.7717/peerj.11681)
Supplement: Supplemental Information 4 [file peerj-09-11681-s004.xlsx]

## Sheet: S1
Table S1. The primer sequence of real-time PCR
Gene ID	Forward primer	Reverse primer	bp
OCS_05937	TCAAGCGGTCGTTTCGGTCTC	GAGCGTCACAATCGGCGAGA	170
OCS_03760	TGCCGAGTTCAAGACGCACAC	CAACCGCCACGTTCTGTATCTCGA	197
OCS_00482	AATTGGCGGCATGGACTCGAC	GACATGGTGTTGCGACTGATGCC	183
OCS_06122	AGCCATCATCCAAGCCGTCGAG	CTGGACACTTCTAGCTCGCGGA	202
OCS_06093	TCAAGAAGCAGAGCAAGTGGTCC	CTCGTACAGCCTCGCAAGCT	200
OCS_04188	CCGCCACCATTGTCATTCCCAC	GTGGTCAAAGGGCGGGACAT	173
OCS_02882	GACGAGATTGTCACCGACCTGC	CACCGCAATGGGCTTGGACA	186
OCS_04932	TCATCGACCGCTCCCACATCAC	CCTTGATCTGGTTGGCAACGTCG	201
OCS_02728	CATGCTCAAGGTCTACGGCTACG	GAAACGTACTGCGCCGATGCT	184
OCS_06591	AGCTCAACGAAGCCCTCAACG	GATTTGCGTCGTCAGCAGCGAC	179
OCS_01242	GCTGAGAACACGGTCAAGAAGCAC	CATGAAGCCCTCGTCCGTGT	180
OCS_00172	ACACCATCTGCTGCGTCTTGC	CGAGACGTTGATGGAGACGACCT	206
β-acting	TATTCTTACCCTCCGCTACC	GGCGTGGGGAAGAGCGAAAC	208

## Sheet: S2
Table S2. Sample information of O. Sinensis
No.	Names	Collection address	Time	Latitude and longitude
1	OSW_S1	Chongdegou, Xiaojin County, Aba Prefecture	2019.04	N31°08′51.99″ E102°21′26.78″
2	OSW_S2	Yajia Terrier, Kangding County, Ganzi Prefecture	2018.06	N29°52′1.49″ E102°01′44.82″
3	OSW_S3	Maziya, Xiaojin County, Aba Prefecture	2018.04	N31°08′51.99″ E102°21′26.78″
4	OSC_S1	Zhengjiang(Co., Ltd)	2019.08	—
5	OSC_S2	Linzhi(Co., Ltd)	2019.07	—
6	OSC_S3	Linzhi(Co., Ltd)	2018.01	—

## Sheet: S3
Table S2. The statistical table of pretreatment results of sequencing data
ID	Total(M)	Clean reads(M)	GC content	Q20	Q30	Reads passed filters ratio
OSW_1	84.2289	76.864256	0.608	0.9819	0.9469	0.9126
OSW_2	50.4366	44.9695	0.6137	0.9798	0.9413	0.8916
OSC_1	32.7512	29.5942	0.6007	0.9871	0.9395	0.9036
OSC_2	36.2968	32.615214	0.5964	0.9866	0.9368	0.8986

## Sheet: S4
Table S3. Comparision of the results of the sequencing data and the reference genome
ID	Input reads	Left mapped reads	Left mapped reads	Right mapped reads	Right multiple map reads	Overall mapping rate
OSW_1	46114439	37323134（88.6%）	148903(0.4%)	33775630（80.2%）	133587(0.4%)	0.844
OSW_2	25218319	22083998（87.6%）	78029(0.4%)	19454612（77.1%）	68480(0.4%)	0.824
OSC_1	16375610	13695317（83.6%）	27955(0.2%)	13391179（81.8%）	27146(0.2%)	0.827
OSC_2	18148418	14876938（82.0%）	41041(0.3%)	14541098（80.1%）	40342(0.3%)	0.81

## Sheet: S5
Table S4. Function annotation results of differentially expressed genes in varied databases
#ID	COG_class	COG_class_annotation	GO_annotation	KEGG_annotation	KEGG_pathway_annotation	Pfam_annotation	Swiss-Prot_annotation	eggNOG_class	eggNOG_class_annotation	NR_annotation
OCS_03386	--	--	Molecular Function: nucleotide binding (GO:0000166);; Molecular Function: RNA binding (GO:0003723);;	--	--	YT521-B-like domain;; RNA recognition motif. (a.k.a. RRM, RBD, or RNP domain)	Methylated RNA-binding protein 1 OS=Saccharomyces cerevisiae (strain ATCC 204508 / S288c) OX=559292 GN=PHO92 PE=1 SV=1	S	Function unknown	YTH domain protein [Ophiocordyceps sinensis CO18]
OCS_01618	[C]	Energy production and conversion	Molecular Function: methyltransferase activity (GO:0008168);; Cellular Component: integral component of membrane (GO:0016021);; Molecular Function: oxidoreductase activity (GO:0016491);; Biological Process: oxidation-reduction process (GO:0055114);;	--	--	Tryptophan halogenase;; FAD binding domain;; NAD(P)-binding Rossmann-like domain	Flavine halogenase aclH OS=Aspergillus oryzae (strain ATCC 42149 / RIB 40) OX=510516 GN=aclH PE=1 SV=1	S	Function unknown	Tryptophan halogenase [Ophiocordyceps sinensis CO18]
Ophiocordyceps_sinensis_newGene_3031	[J]	Translation, ribosomal structure and biogenesis	Molecular Function: tRNA (adenine-N1-)-methyltransferase activity (GO:0016429);; Biological Process: tRNA methylation (GO:0030488);; Cellular Component: tRNA (m1A) methyltransferase complex (GO:0031515);;	--	--	--	--	S	Function unknown	tRNA (adenine(58)-N(1))-methyltransferase TrmI [Tolypocladium ophioglossoides CBS 100239]
OCS_00976	--	--	--	--	--	--	--	S	Function unknown	hypothetical protein OCS_00976 [Ophiocordyceps sinensis CO18]
OCS_02825	--	--	--	--	--	--	--	--	--	hypothetical protein OCS_02825 [Ophiocordyceps sinensis CO18]
OCS_01184	--	--	Cellular Component: nucleus (GO:0005634);; Cellular Component: cytosol (GO:0005829);;	--	--	--	--	S	Function unknown	WW-domain-binding protein [Ophiocordyceps sinensis CO18]
OCS_00748	[I]	Lipid transport and metabolism	Biological Process: lipid metabolic process (GO:0006629);; Cellular Component: integral component of membrane (GO:0016021);; Molecular Function: oxidoreductase activity (GO:0016491);; Biological Process: oxidation-reduction process (GO:0055114);;	K13076|0|val:VDBG_07330|K13076 Delta8-fatty-acid desaturase [EC:1.14.19.4] | (RefSeq) fatty acid desaturase	--	Fatty acid desaturase;; Cytochrome b5-like Heme/Steroid binding domain	Delta 8-(E)-sphingolipid desaturase OS=Kluyveromyces lactis (strain ATCC 8585 / CBS 2359 / DSM 70799 / NBRC 1267 / NRRL Y-1140 / WM37) OX=284590 GN=SLD PE=3 SV=1	I	Lipid transport and metabolism	fatty acid desaturase [Ophiocordyceps sinensis CO18]
Ophiocordyceps_sinensis_newGene_2790	--	--	Cellular Component: cytoplasm (GO:0005737);; Biological Process: amino acid transport (GO:0006865);; Cellular Component: membrane (GO:0016020);; Biological Process: regulation of biological process (GO:0050789);;	--	--	Hamartin protein	Tuberous sclerosis 1 protein homolog OS=Schizosaccharomyces pombe (strain 972 / ATCC 24843) OX=284812 GN=tsc1 PE=1 SV=1	S	Function unknown	hypothetical protein CDD83_6770 [Cordyceps sp. RAO-2017]
OCS_06786	--	--	Molecular Function: DNA binding (GO:0003677);; Cellular Component: membrane (GO:0016020);;	K09420|4.6605e-21|ela:UCREL1_1448|K09420 myb proto-oncogene protein | (RefSeq) putative myb transcription protein	--	Myb-like DNA-binding domain;; Myb-like DNA-binding domain;; Myb-like DNA-binding domain	Myb-like DNA-binding protein BAS1 OS=Saccharomyces cerevisiae (strain ATCC 204508 / S288c) OX=559292 GN=BAS1 PE=1 SV=1	K	Transcription	Myb transcription factor [Ophiocordyceps sinensis CO18]
Ophiocordyceps_sinensis_newGene_904	--	--	--	--	--	--	--	--	--	hypothetical protein HIM_04886 [Hirsutella minnesotensis 3608]
Ophiocordyceps_sinensis_newGene_3424	--	--	Molecular Function: carboxypeptidase activity (GO:0004180);; Cellular Component: membrane (GO:0016020);; Biological Process: primary metabolic process (GO:0044238);; Biological Process: single-organism metabolic process (GO:0044710);; Biological Process: organic substance metabolic process (GO:0071704);;	K07750|6.50138e-28|maj:MAA_10690|K07750 methylsterol monooxygenase [EC:1.14.13.72] | (RefSeq) hypothetical protein	Steroid biosynthesis (ko00100);; Biosynthesis of antibiotics (ko01130)	--	--	I	Lipid transport and metabolism	Carboxypeptidase, partial [Tolypocladium capitatum]
OCS_00702	[HR]	Coenzyme transport and metabolism;; General function prediction only	--	--	--	alpha/beta hydrolase fold;; TAP-like protein	--	S	Function unknown	S33 family peptidase [Ophiocordyceps sinensis CO18]
OCS_00477	--	--	--	--	--	--	--	S	Function unknown	hypothetical protein OCS_00477 [Ophiocordyceps sinensis CO18]
OCS_01617	--	--	Cellular Component: integral component of membrane (GO:0016021);;	K18158|0|maw:MAC_06406|K18158 nuclear control of ATPase protein 2 | (RefSeq) ATP synthase regulation protein NCA2	--	ATP synthase regulation protein NCA2	Nuclear control of ATPase protein 2 OS=Schizosaccharomyces pombe (strain 972 / ATCC 24843) OX=284812 GN=nca2 PE=3 SV=1	S	Function unknown	ATP synthase regulation protein NCA2 [Ophiocordyceps sinensis CO18]
OCS_04159	--	--	Cellular Component: integral component of membrane (GO:0016021);;	--	--	--	--	S	Function unknown	Formylmethionine deformylase-like protein [Ophiocordyceps sinensis CO18]
OCS_01437	[M]	Cell wall/membrane/envelope biogenesis	Molecular Function: catalytic activity (GO:0003824);; Cellular Component: membrane (GO:0016020);; Molecular Function: coenzyme binding (GO:0050662);;	--	--	NAD dependent epimerase/dehydratase family	--	S	Function unknown	NAD(P)-binding domain protein [Ophiocordyceps sinensis CO18]
OCS_05271	[K]	Transcription	Molecular Function: O-methyltransferase activity (GO:0008171);; Biological Process: methylation (GO:0032259);;	--	--	O-methyltransferase	O-methyltransferase bik3 OS=Gibberella fujikuroi (strain CBS 195.34 / IMI 58289 / NRRL A-6831) OX=1279085 GN=bik3 PE=2 SV=1	S	Function unknown	O-methyltransferase [Ophiocordyceps sinensis CO18]
Ophiocordyceps_sinensis_newGene_1311	[F]	Nucleotide transport and metabolism	--	K16330|0|fgr:FGSG_00486|K16330 pseudouridylate synthase / pseudouridine kinase [EC:4.2.1.70 2.7.1.83] | (RefSeq) hypothetical protein	Pyrimidine metabolism (ko00240)	Indigoidine synthase A like protein;; Indigoidine synthase A like protein	Pseudouridine-metabolizing bifunctional protein C1861.05 OS=Schizosaccharomyces pombe (strain 972 / ATCC 24843) OX=284812 GN=SPBC1861.05 PE=3 SV=1	Q	Secondary metabolites biosynthesis, transport and catabolism
Ophiocordyceps_sinensis_newGene_2722	--	--	--	--	--	--	--	S	Function unknown	hypothetical protein HIM_02492 [Hirsutella minnesotensis 3608]
OCS_06753	[QV]	Secondary metabolites biosynthesis, transport and catabolism;; Defense mechanisms	Molecular Function: monooxygenase activity (GO:0004497);; Molecular Function: iron ion binding (GO:0005506);; Molecular Function: oxidoreductase activity, acting on paired donors, with incorporation or reduction of molecular oxygen (GO:0016705);; Molecular Function: heme binding (GO:0020037);; Biological Process: oxidation-reduction process (GO:0055114);;	K09831|0|maj:MAA_01109|K09831 sterol 22-desaturase [EC:1.14.19.41] | (RefSeq) Cytochrome P450 CYP61A1	Steroid biosynthesis (ko00100);; Biosynthesis of antibiotics (ko01130)	Cytochrome P450	Cytochrome P450 61 OS=Saccharomyces cerevisiae (strain ATCC 204508 / S288c) OX=559292 GN=ERG5 PE=1 SV=1	Q	Secondary metabolites biosynthesis, transport and catabolism	cytochrome P450 61 [Ophiocordyceps sinensis CO18]
Ophiocordyceps_sinensis_newGene_3355	[Q]	Secondary metabolites biosynthesis, transport and catabolism	Molecular Function: oxidoreductase activity (GO:0016491);; Molecular Function: transferase activity (GO:0016740);; Molecular Function: phosphopantetheine binding (GO:0031177);; Biological Process: oxidation-reduction process (GO:0055114);;	--	--	KR domain;; Condensation domain;; Zinc-binding dehydrogenase;; Zinc-binding dehydrogenase;; short chain dehydrogenase;; Phosphopantetheine attachment site;; Enoyl-(Acyl carrier protein) reductase;; Alcohol dehydrogenase GroES-like domain;; 3-beta hydroxysteroid dehydrogenase/isomerase family;; AMP-binding enzyme;; AMP-binding enzyme	Highly reducing polyketide synthase ZEA2 OS=Gibberella zeae (strain PH-1 / ATCC MYA-4620 / FGSC 9075 / NRRL 31084) OX=229533 GN=ZEA2 PE=2 SV=1	Q	Secondary metabolites biosynthesis, transport and catabolism	hypothetical protein CDD83_7783 [Cordyceps sp. RAO-2017]
OCS_02656	--	--	Biological Process: double-strand break repair via homologous recombination (GO:0000724);; Molecular Function: ATP binding (GO:0005524);; Cellular Component: nucleus (GO:0005634);; Cellular Component: cytosol (GO:0005829);; Biological Process: reciprocal meiotic recombination (GO:0007131);; Molecular Function: hydrolase activity (GO:0016787);; Cellular Component: site of double-strand break (GO:0…	--	--	Rad51	--	S	Function unknown	DNA recombination/repair protein RecA/RadB, ATP-binding domain protein [Ophiocordyceps sinensis CO18]
Ophiocordyceps_sinensis_newGene_895	--	--	Cellular Component: integral component of membrane (GO:0016021);;	--	--	--	--	--	--	hypothetical protein OCS_04554 [Ophiocordyceps sinensis CO18]
Ophiocordyceps_sinensis_newGene_2672	[T]	Signal transduction mechanisms	Molecular Function: kinase activity (GO:0016301);;	--	--	Protein kinase domain;; Protein tyrosine kinase;; Phosphotransferase enzyme family;; Kinase-like	Calcium/calmodulin-dependent protein kinase type I OS=Schizosaccharomyces pombe (strain 972 / ATCC 24843) OX=284812 GN=cmk1 PE=1 SV=1	T	Signal transduction mechanisms	kinase-like protein [Ophiocordyceps sinensis CO18]
OCS_00479	--	--	Cellular Component: integral component of membrane (GO:0016021);; Molecular Function: oxidoreductase activity (GO:0016491);; Molecular Function: metal ion binding (GO:0046872);; Biological Process: oxidation-reduction process (GO:0055114);;	K00505|2.46532e-155|maj:MAA_10801|K00505 tyrosinase [EC:1.14.18.1] | (RefSeq) BolA protein	Tyrosine metabolism (ko00350);; Riboflavin metabolism (ko00740)	Common central domain of tyrosinase	Tyrosinase ustQ OS=Aspergillus flavus (strain ATCC 200026 / FGSC A1120 / NRRL 3357 / JCM 12722 / SRRC 167) OX=332952 GN=ustQ PE=1 SV=1	S	Function unknown	tyrosinase [Ophiocordyceps sinensis CO18]
OCS_05194	[T]	Signal transduction mechanisms	Molecular Function: protein kinase activity (GO:0004672);; Molecular Function: ATP binding (GO:0005524);; Biological Process: protein phosphorylation (GO:0006468);;	--	--	Protein kinase domain;; Protein tyrosine kinase	Protein kinase dsk1 OS=Schizosaccharomyces pombe (strain 972 / ATCC 24843) OX=284812 GN=dsk1 PE=3 SV=2	T	Signal transduction mechanisms	protein kinase domain protein [Ophiocordyceps sinensis CO18]
OCS_00273	[H]	Coenzyme transport and metabolism	Molecular Function: catalytic activity (GO:0003824);; Cellular Component: cytosol (GO:0005829);; Molecular Function: zinc ion binding (GO:0008270);;	--	--	Cytidine and deoxycytidylate deaminase zinc-binding region	Bifunctional protein RIB2 OS=Saccharomyces cerevisiae (strain ATCC 204508 / S288c) OX=559292 GN=RIB2 PE=1 SV=1	H	Coenzyme transport and metabolism	cytidine and deoxycytidylate deaminase [Ophiocordyceps sinensis CO18]
OCS_00480	--	--	--	--	--	--	Ribosomally synthesized cyclic peptide ustiloxin B precursosr OS=Aspergillus flavus (strain ATCC 200026 / FGSC A1120 / NRRL 3357 / JCM 12722 / SRRC 167) OX=332952 GN=ustA PE=1 SV=1	S	Function unknown	hypothetical protein OCS_00480 [Ophiocordyceps sinensis CO18]
OCS_05937	--	--	--	--	--	BTB/POZ domain	--	S	Function unknown	BTB/POZ fold domain containing protein [Ophiocordyceps sinensis CO18]
OCS_03341	--	--	--	--	--	--	--	S	Function unknown	polyprotein [Ophiocordyceps sinensis CO18]
OCS_04813	[IQR]	Lipid transport and metabolism;; Secondary metabolites biosynthesis, transport and catabolism;; General function prediction only	--	--	--	Enoyl-(Acyl carrier protein) reductase;; short chain dehydrogenase;; KR domain	Versicolorin reductase 1 OS=Dothistroma septosporum (strain NZE10 / CBS 128990) OX=675120 GN=ver1 PE=2 SV=1	S	Function unknown	oxidoreductase, short-chain dehydrogenase/reductase family [Ophiocordyceps sinensis CO18]
OCS_06530	--	--	--	--	--	--	--	--	--	hypothetical protein OCS_06530 [Ophiocordyceps sinensis CO18]
OCS_06368	[Q]	Secondary metabolites biosynthesis, transport and catabolism	Molecular Function: dioxygenase activity (GO:0051213);; Biological Process: oxidation-reduction process (GO:0055114);;	K06912|1.16352e-120|pno:SNOG_11187|K06912 alpha-ketoglutarate-dependent 2,4-dichlorophenoxyacetate dioxygenase [EC:1.14.11.-] | (RefSeq) hypothetical protein	--	Taurine catabolism dioxygenase TauD, TfdA family	--	Q	Secondary metabolites biosynthesis, transport and catabolism	Taurine catabolism dioxygenase TauD/TfdA [Ophiocordyceps sinensis CO18]
OCS_03760	--	--	--	--	--	SET domain	SET domain-containing protein 5 OS=Schizosaccharomyces pombe (strain 972 / ATCC 24843) OX=284812 GN=set5 PE=1 SV=1	S	Function unknown	SET domain protein [Ophiocordyceps sinensis CO18]
OCS_01651	--	--	--	K14324|2.7033e-36|nhe:NECHADRAFT_106211|K14324 histone deacetylase complex subunit SAP18 | (RefSeq) HCP2101; hypothetical protein	RNA transport (ko03013);; mRNA surveillance pathway (ko03015)	Sin3 associated polypeptide p18 (SAP18)	--	S	Function unknown	Sin3-associated polypeptide Sap18 [Ophiocordyceps sinensis CO18]
OCS_06589	--	--	--	--	--	--	--	S	Function unknown	hypothetical protein OCS_06589 [Ophiocordyceps sinensis CO18]
OCS_04011	--	--	Cellular Component: integral component of membrane (GO:0016021);;	--	--	--	--	S	Function unknown	hypothetical protein OCS_04011 [Ophiocordyceps sinensis CO18]
OCS_00557	[I]	Lipid transport and metabolism	Molecular Function: inositol-3-phosphate synthase activity (GO:0004512);; Biological Process: inositol biosynthetic process (GO:0006021);; Biological Process: phospholipid biosynthetic process (GO:0008654);;	K01858|0|maw:MAC_04305|K01858 myo-inositol-1-phosphate synthase [EC:5.5.1.4] | (RefSeq) myo-inositol-phosphate synthase	Inositol phosphate metabolism (ko00562);; Biosynthesis of antibiotics (ko01130)	Myo-inositol-1-phosphate synthase;; Myo-inositol-1-phosphate synthase	Inositol-3-phosphate synthase OS=Candida albicans (strain SC5314 / ATCC MYA-2876) OX=237561 GN=INO1 PE=3 SV=1	I	Lipid transport and metabolism	myo-inositol-phosphate synthase [Ophiocordyceps sinensis CO18]
OCS_03215	--	--	Biological Process: proteolysis (GO:0006508);; Molecular Function: hydrolase activity (GO:0016787);; Biological Process: cellular protein metabolic process (GO:0044267);;	K11872|1.22783e-08|maj:MAA_07236|K11872 ubiquitin carboxyl-terminal hydrolase 9/13 [EC:3.4.19.12] | (RefSeq) deubiquinating enzyme	--	--	--	--	--	hypothetical protein OCS_03215 [Ophiocordyceps sinensis CO18]
Ophiocordyceps_sinensis_newGene_2734	--	--	--	--	--	--	--	--	--	hypothetical protein HIM_04474 [Hirsutella minnesotensis 3608]
OCS_05131	--	--	Biological Process: cristae formation (GO:0042407);; Cellular Component: mitochondrial crista junction (GO:0044284);; Cellular Component: MICOS complex (GO:0061617);;	K17786|1.05181e-29|maj:MAA_05730|K17786 mitochondrial organizing structure protein 2 | (RefSeq) Apolipoprotein O	--	--	--	S	Function unknown	hypothetical protein OCS_05131 [Ophiocordyceps sinensis CO18]
OCS_02037	[T]	Signal transduction mechanisms	Molecular Function: protein kinase activity (GO:0004672);; Molecular Function: ATP binding (GO:0005524);; Biological Process: protein phosphorylation (GO:0006468);;	--	--	Ankyrin repeats (3 copies);; Ankyrin repeat;; Protein kinase domain;; Ankyrin repeats (many copies);; Protein tyrosine kinase;; Ankyrin repeats (many copies);; Ankyrin repeat	Serine/threonine-protein kinase ste20 OS=Neurospora crassa (strain ATCC 24698 / 74-OR23-1A / CBS 708.71 / DSM 1257 / FGSC 987) OX=367110 GN=stk-4 PE=3 SV=1	T	Signal transduction mechanisms	Protein kinase-like domain protein [Ophiocordyceps sinensis CO18]
OCS_06865	--	--	Cellular Component: integral component of membrane (GO:0016021);;	--	--	--	--	--	--	hypothetical protein OCS_06865 [Ophiocordyceps sinensis CO18]
Ophiocordyceps_sinensis_newGene_4330	--	--	--	--	--	--	--	--	--	hypothetical protein XA68_15314 [Ophiocordyceps unilateralis]
OCS_05992	[I]	Lipid transport and metabolism	Molecular Function: iron ion binding (GO:0005506);; Biological Process: fatty acid biosynthetic process (GO:0006633);; Cellular Component: integral component of membrane (GO:0016021);; Molecular Function: oxidoreductase activity (GO:0016491);; Biological Process: oxidation-reduction process (GO:0055114);;	--	--	Fatty acid hydroxylase superfamily	Fatty acid hydroxylase vlmA OS=Lecanicillium sp. OX=1756136 GN=vlmA PE=3 SV=1	--	--	fatty acid hydroxylase superfamily protein [Ophiocordyceps sinensis CO18]
OCS_03016	--	--	Molecular Function: nucleotide binding (GO:0000166);;	--	--	--	--	--	--	hypothetical protein OCS_03016 [Ophiocordyceps sinensis CO18]
OCS_04289	--	--	--	--	--	--	--	S	Function unknown	hypothetical protein OCS_04289 [Ophiocordyceps sinensis CO18]
Ophiocordyceps_sinensis_newGene_3353	[Q]	Secondary metabolites biosynthesis, transport and catabolism	Molecular Function: oxidoreductase activity (GO:0016491);; Molecular Function: transferase activity (GO:0016740);; Molecular Function: phosphopantetheine binding (GO:0031177);; Biological Process: oxidation-reduction process (GO:0055114);;	--	--	Beta-ketoacyl synthase, N-terminal domain;; Acyl transferase domain;; Polyketide synthase dehydratase;; Beta-ketoacyl synthase, C-terminal domain;; Ketoacyl-synthetase C-terminal extension	Highly reducing polyketide synthase sdnO OS=Sordaria araneosa OX=573841 GN=sdnO PE=3 SV=1	Q	Secondary metabolites biosynthesis, transport and catabolism	hypothetical protein HIM_02330 [Hirsutella minnesotensis 3608]
OCS_05195	--	--	--	--	--	--	--	S	Function unknown	hypothetical protein OCS_05195 [Ophiocordyceps sinensis CO18]
OCS_06531	[G]	Carbohydrate transport and metabolism	Molecular Function: catalytic activity (GO:0003824);;	--	--	--	--	G	Carbohydrate transport and metabolism	NHL repeat-containing protein [Ophiocordyceps sinensis CO18]
OCS_05240	[M]	Cell wall/membrane/envelope biogenesis	--	--	--	--	Short chain dehydrogenase sirQ OS=Leptosphaeria maculans OX=5022 GN=sirQ PE=3 SV=1	S	Function unknown	SirS [Ophiocordyceps sinensis CO18]
OCS_02341	--	--	--	--	--	--	--	S	Function unknown	perilipin MPL1-like protein [Ophiocordyceps sinensis CO18]
Ophiocordyceps_sinensis_newGene_922	[J]	Translation, ribosomal structure and biogenesis	Cellular Component: nucleus (GO:0005634);; Cellular Component: cytoplasm (GO:0005737);; Biological Process: maturation of SSU-rRNA (GO:0030490);;	K09140|2.92894e-125|fpu:FPSE_01144|K09140 pre-rRNA-processing protein TSR3 | (RefSeq) hypothetical protein	--	Ribosome biogenesis protein, C-terminal;; Possible Fer4-like domain in RNase L inhibitor, RLI	Ribosome biogenesis protein tsr3 OS=Schizosaccharomyces pombe (strain 972 / ATCC 24843) OX=284812 GN=tsr3 PE=3 SV=1	S	Function unknown	hypothetical protein HIM_08222 [Hirsutella minnesotensis 3608]
OCS_00356	--	--	--	--	--	--	--	S	Function unknown	hypothetical protein OCS_00356 [Ophiocordyceps sinensis CO18]
Ophiocordyceps_sinensis_newGene_3148	--	--	--	--	--	--	--	S	Function unknown	clumping factor B [Metarhizium guizhouense ARSEF 977]
OCS_06621	--	--	--	--	--	--	--	--	--	hypothetical protein OCS_05868 [Ophiocordyceps sinensis CO18]
Ophiocordyceps_sinensis_newGene_4514	--	--	--	--	--	--	--	S	Function unknown	hypothetical protein RJ55_01575 [Drechmeria coniospora]
OCS_02362	[R]	General function prediction only	Molecular Function: hydrolase activity (GO:0016787);;	--	--	Amidohydrolase	2,3-dihydroxybenzoate decarboxylase OS=Aspergillus oryzae (strain ATCC 42149 / RIB 40) OX=510516 GN=AO090005000447 PE=1 SV=2	S	Function unknown	amidohydrolase family protein [Ophiocordyceps sinensis CO18]
OCS_02572	--	--	--	--	--	--	--	--	--	hypothetical protein OCS_02572 [Ophiocordyceps sinensis CO18]
OCS_03177	--	--	Molecular Function: RNA polymerase II transcription factor activity, sequence-specific DNA binding (GO:0000981);; Molecular Function: DNA binding (GO:0003677);; Cellular Component: nucleus (GO:0005634);; Biological Process: regulation of transcription from RNA polymerase II promoter (GO:0006357);; Molecular Function: zinc ion binding (GO:0008270);; Cellular Component: membrane (GO:0016020);; Biol…	--	--	Fungal specific transcription factor domain	Nitrogen assimilation transcription factor nit-4 OS=Neurospora crassa (strain ATCC 24698 / 74-OR23-1A / CBS 708.71 / DSM 1257 / FGSC 987) OX=367110 GN=nit-4 PE=4 SV=2	S	Function unknown	Transcription factor, fungi [Ophiocordyceps sinensis CO18]
OCS_06655	--	--	Molecular Function: ligase activity (GO:0016874);;	K20062|0|maw:MAC_03461|K20062 arrestin-related trafficking adapter 4/5/7 | (RefSeq) arrestin domain-containing protein	--	Arrestin (or S-antigen), C-terminal domain;; Arrestin (or S-antigen), N-terminal domain	Probable HECT-type ubiquitin ligase-interacting protein creD OS=Aspergillus oryzae (strain ATCC 42149 / RIB 40) OX=510516 GN=creD PE=3 SV=2	S	Function unknown	arrestin domain-containing protein [Ophiocordyceps sinensis CO18]
Ophiocordyceps_sinensis_newGene_1910	--	--	--	--	--	HNH endonuclease	--	S	Function unknown	hypothetical protein TOPH_05367, partial [Tolypocladium ophioglossoides CBS 100239]
Ophiocordyceps_sinensis_newGene_4522	--	--	--	--	--	--	--	S	Function unknown	NmrA-like family domain-containing protein 1 [Tolypocladium ophioglossoides CBS 100239]
OCS_05893	--	--	Molecular Function: tRNA binding (GO:0000049);; Biological Process: invasive growth in response to glucose limitation (GO:0001403);; Biological Process: tRNA wobble position uridine thiolation (GO:0002143);; Cellular Component: cytosolic tRNA wobble base thiouridylase complex (GO:0002144);; Cellular Component: nucleus (GO:0005634);; Biological Process: pseudohyphal growth (GO:0007124);; Molecular…	K14169|1.6125e-128|maj:MAA_03598|K14169 cytoplasmic tRNA 2-thiolation protein 2 | (RefSeq) Thiouridylase subunit 2	Sulfur relay system (ko04122)	Cytoplasmic tRNA 2-thiolation protein 2	Cytoplasmic tRNA 2-thiolation protein 2 OS=Phaeosphaeria nodorum (strain SN15 / ATCC MYA-4574 / FGSC 10173) OX=321614 GN=NCS2 PE=3 SV=1	J	Translation, ribosomal structure and biogenesis	Thiouridylase subunit 2 [Ophiocordyceps sinensis CO18]
OCS_03683	--	--	--	--	--	--	--	--	--	hypothetical protein OCS_03683 [Ophiocordyceps sinensis CO18]
OCS_04455	--	--	Cellular Component: integral component of membrane (GO:0016021);;	--	--	--	--	--	--	hypothetical protein OCS_04455 [Ophiocordyceps sinensis CO18]
OCS_03344	[G]	Carbohydrate transport and metabolism	--	K15206|4.6586e-107|maj:MAA_05838|K15206 transcription factor C subunit 7 | (RefSeq) RNA polymerase III transcription initiation factor complex component	--	Histidine phosphatase superfamily (branch 1)	Transcription factor tau 55 kDa subunit OS=Saccharomyces cerevisiae (strain ATCC 204508 / S288c) OX=559292 GN=TFC7 PE=1 SV=1	G	Carbohydrate transport and metabolism	phosphoglycerate mutase family protein [Ophiocordyceps sinensis CO18]
OCS_00873	--	--	--	--	--	--	--	S	Function unknown	hypothetical protein OCS_00873 [Ophiocordyceps sinensis CO18]
Ophiocordyceps_sinensis_newGene_3340	[M]	Cell wall/membrane/envelope biogenesis	--	--	--	Zinc carboxypeptidase;; Carboxypeptidase activation peptide	Metallocarboxypeptidase A-like protein MCYG_01475 OS=Arthroderma otae (strain ATCC MYA-4605 / CBS 113480) OX=554155 GN=MCYG_01475 PE=3 SV=1	E	Amino acid transport and metabolism	hypothetical protein CDD83_5908 [Cordyceps sp. RAO-2017]
Ophiocordyceps_sinensis_newGene_2922	--	--	Cellular Component: integral component of membrane (GO:0016021);;	--	--	--	--	S	Function unknown	hypothetical protein CDD81_4750 [Ophiocordyceps australis]
OCS_03223	--	--	--	--	--	--	--	S	Function unknown	hypothetical protein OCS_03223 [Ophiocordyceps sinensis CO18]
OCS_06362	--	--	--	--	--	--	--	S	Function unknown	hypothetical protein OCS_06362 [Ophiocordyceps sinensis CO18]
OCS_03159	[Q]	Secondary metabolites biosynthesis, transport and catabolism	Molecular Function: arylsulfatase activity (GO:0004065);; Molecular Function: zinc ion binding (GO:0008270);; Molecular Function: beta-lactamase activity (GO:0008800);; Biological Process: antibiotic catabolic process (GO:0017001);; Molecular Function: alkyl sulfatase activity (GO:0018741);; Biological Process: dodecyl sulfate metabolic process (GO:0018909);; Molecular Function: protein dimerizat…	--	--	Alkyl sulfatase dimerisation;; Alkyl sulfatase C-terminal;; Metallo-beta-lactamase superfamily;; Beta-lactamase superfamily domain	Alkyl/aryl-sulfatase BDS1 OS=Saccharomyces cerevisiae (strain ATCC 204508 / S288c) OX=559292 GN=BDS1 PE=1 SV=1	Q	Secondary metabolites biosynthesis, transport and catabolism	beta-lactamase domain-containing protein [Ophiocordyceps sinensis CO18]
OCS_04188	[E]	Amino acid transport and metabolism	Molecular Function: L-serine ammonia-lyase activity (GO:0003941);; Molecular Function: L-threonine ammonia-lyase activity (GO:0004794);; Biological Process: L-serine catabolic process (GO:0006565);; Biological Process: threonine catabolic process (GO:0006567);; Molecular Function: pyridoxal phosphate binding (GO:0030170);; Cellular Component: mitochondrial nucleoid (GO:0042645);;	K17989|0|maj:MAA_00132|K17989 L-serine/L-threonine ammonia-lyase [EC:4.3.1.17 4.3.1.19] | (RefSeq) Serine/threonine dehydratase, pyridoxal-phosphate-binding site	Glycine, serine and threonine metabolism (ko00260);; Cysteine and methionine metabolism (ko00270);; Valine, leucine and isoleucine biosynthesis (ko00290);; Biosynthesis of antibiotics (ko01130);; Carbon metabolism (ko01200);; Biosynthesis of amino acids (ko01230)	Pyridoxal-phosphate dependent enzyme	L-serine dehydratase OS=Saccharomyces cerevisiae (strain AWRI1631) OX=545124 GN=SDL1 PE=3 SV=1	E	Amino acid transport and metabolism	serine family amino acid catabolism- protein [Ophiocordyceps sinensis CO18]
OCS_06040	--	--	Molecular Function: kinase activity (GO:0016301);; Biological Process: phosphorylation (GO:0016310);;	--	--	Phosphotransferase enzyme family	--	S	Function unknown	Protein kinase-like domain protein [Ophiocordyceps sinensis CO18]
OCS_05393	[L]	Replication, recombination and repair	Molecular Function: nucleotide binding (GO:0000166);; Molecular Function: DNA binding (GO:0003677);; Molecular Function: DNA-directed DNA polymerase activity (GO:0003887);; Biological Process: DNA replication (GO:0006260);; Molecular Function: 3'-5' exonuclease activity (GO:0008408);; Biological Process: DNA biosynthetic process (GO:0071897);; Biological Process: nucleic acid phosphodiester bond …	K02327|0|maw:MAC_08385|K02327 DNA polymerase delta subunit 1 [EC:2.7.7.7] | (RefSeq) DNA polymerase delta catalytic subunit	Purine metabolism (ko00230);; Pyrimidine metabolism (ko00240);; DNA replication (ko03030);; Base excision repair (ko03410);; Nucleotide excision repair (ko03420);; Mismatch repair (ko03430);; Homologous recombination (ko03440)	DNA polymerase family B;; DNA polymerase family B, exonuclease domain;; C4-type zinc-finger of DNA polymerase delta	DNA polymerase delta catalytic subunit OS=Schizosaccharomyces pombe (strain 972 / ATCC 24843) OX=284812 GN=pol3 PE=1 SV=2	L	Replication, recombination and repair	DNA polymerase delta catalytic subunit [Ophiocordyceps sinensis CO18]
OCS_04967	--	--	--	--	--	--	--	S	Function unknown	hypothetical protein OCS_04967 [Ophiocordyceps sinensis CO18]
Ophiocordyceps_sinensis_newGene_1219	--	--	Molecular Function: RNA polymerase II transcription factor activity, sequence-specific DNA binding (GO:0000981);; Cellular Component: nucleus (GO:0005634);; Biological Process: regulation of transcription from RNA polymerase II promoter (GO:0006357);; Molecular Function: zinc ion binding (GO:0008270);;	--	--	Fungal specific transcription factor domain	Transcriptional regulatory protein pro1 OS=Neurospora crassa (strain ATCC 24698 / 74-OR23-1A / CBS 708.71 / DSM 1257 / FGSC 987) OX=367110 GN=adv-1 PE=2 SV=1	K	Transcription	Transcriptional regulatory protein pro1 [Tolypocladium capitatum]
OCS_04599	--	--	Cellular Component: integral component of membrane (GO:0016021);;	K20858|9.0101e-08|maj:MAA_05443|K20858 calcium uniporter protein, mitochondrial | (RefSeq) siderophore biosynthesis protein	--	--	--	--	--	hypothetical protein OCS_04599 [Ophiocordyceps sinensis CO18]
OCS_04818	--	--	--	--	--	--	--	--	--	hypothetical protein OCS_04818 [Ophiocordyceps sinensis CO18]
Ophiocordyceps_sinensis_newGene_2682	[O]	Posttranslational modification, protein turnover, chaperones	Molecular Function: protein-L-isoaspartate (D-aspartate) O-methyltransferase activity (GO:0004719);; Biological Process: protein methylation (GO:0006479);;	K00573|1.33572e-62|tre:TRIREDRAFT_122131|K00573 protein-L-isoaspartate(D-aspartate) O-methyltransferase [EC:2.1.1.77] | (RefSeq) hypothetical protein	--	Protein-L-isoaspartate(D-aspartate) O-methyltransferase (PCMT)	Probable protein-L-isoaspartate O-methyltransferase OS=Schizosaccharomyces pombe (strain 972 / ATCC 24843) OX=284812 GN=pcm2 PE=3 SV=1	O	Posttranslational modification, protein turnover, chaperones	hypothetical protein CDD83_4623 [Cordyceps sp. RAO-2017]
OCS_05488	[K]	Transcription	Biological Process: transcription, RNA-templated (GO:0001172);; Molecular Function: DNA binding (GO:0003677);; Molecular Function: RNA binding (GO:0003723);; Molecular Function: DNA-directed 5'-3' RNA polymerase activity (GO:0003899);; Cellular Component: DNA-directed RNA polymerase II, core complex (GO:0005665);; Cellular Component: cytosol (GO:0005829);; Biological Process: transcription from R…	K03010|0|maj:MAA_00336|K03010 DNA-directed RNA polymerase II subunit RPB2 [EC:2.7.7.6] | (RefSeq) DNA-dependent RNA polymerase II beta subunit	Purine metabolism (ko00230);; Pyrimidine metabolism (ko00240);; RNA polymerase (ko03020)	RNA polymerase Rpb2, domain 6;; RNA polymerase beta subunit;; RNA polymerase Rpb2, domain 2;; RNA polymerase Rpb2, domain 7;; RNA polymerase Rpb2, domain 3;; RNA polymerase Rpb2, domain 5;; RNA polymerase Rpb2, domain 4	DNA-directed RNA polymerase II subunit RPB2 OS=Meyerozyma guilliermondii (strain ATCC 6260 / CBS 566 / DSM 6381 / JCM 1539 / NBRC 10279 / NRRL Y-324) OX=294746 GN=RPB2 PE=3 SV=3	K	Transcription	DNA-dependent RNA polymerase II beta subunit [Ophiocordyceps sinensis CO18]
OCS_01808	--	--	--	--	--	--	--	--	--	hypothetical protein OCS_01808 [Ophiocordyceps sinensis CO18]
OCS_00661	[G]	Carbohydrate transport and metabolism	Cellular Component: integral component of membrane (GO:0016021);; Biological Process: transmembrane transport (GO:0055085);;	--	--	Major Facilitator Superfamily	Uncharacterized transporter C1002.16c OS=Schizosaccharomyces pombe (strain 972 / ATCC 24843) OX=284812 GN=SPAC1002.16c PE=3 SV=1	G	Carbohydrate transport and metabolism	MFS transporter [Ophiocordyceps sinensis CO18]
OCS_02399	--	--	--	--	--	--	--	S	Function unknown	GMP synthase [Ophiocordyceps sinensis CO18]
OCS_04732	--	--	--	--	--	--	Nonribosomal peptide synthetase fmpE OS=Neosartorya fumigata (strain ATCC MYA-4609 / Af293 / CBS 101355 / FGSC A1100) OX=330879 GN=fmpE PE=2 SV=1	Q	Secondary metabolites biosynthesis, transport and catabolism	NRPS5, nonribosomal peptide synthetase, sequence [Ophiocordyceps sinensis CO18]
OCS_06125	--	--	--	--	--	--	--	--	--	hypothetical protein OCS_06125 [Ophiocordyceps sinensis CO18]
OCS_03251	[L]	Replication, recombination and repair	Biological Process: double-strand break repair via break-induced replication (GO:0000727);; Biological Process: DNA catabolic process, endonucleolytic (GO:0000737);; Molecular Function: double-stranded telomeric DNA binding (GO:0003691);; Molecular Function: adenylate kinase activity (GO:0004017);; Molecular Function: endodeoxyribonuclease activity (GO:0004520);; Molecular Function: aminoacyl-tRN…	K10865|0|maj:MAA_08335|K10865 double-strand break repair protein MRE11 | (RefSeq) DNA repair protein rad32	Homologous recombination (ko03440);; Non-homologous end-joining (ko03450)	Mre11 DNA-binding presumed domain;; Calcineurin-like phosphoesterase	Double-strand break repair protein mus-23 OS=Neurospora crassa (strain ATCC 24698 / 74-OR23-1A / CBS 708.71 / DSM 1257 / FGSC 987) OX=367110 GN=mus-23 PE=3 SV=3	L	Replication, recombination and repair	DNA repair protein rad32 [Ophiocordyceps sinensis CO18]
OCS_00040	[X]	Mobilome: prophages, transposons	Molecular Function: microtubule motor activity (GO:0003777);; Cellular Component: kinesin complex (GO:0005871);; Biological Process: nucleoside metabolic process (GO:0009116);; Molecular Function: ADP binding (GO:0043531);;	--	--	Phosphorylase superfamily;; NB-ARC domain	--	F	Nucleotide transport and metabolism	Nucleoside phosphorylase domain protein [Ophiocordyceps sinensis CO18]
Ophiocordyceps_sinensis_newGene_3418	--	--	Molecular Function: kinase activity (GO:0016301);; Biological Process: phosphorylation (GO:0016310);;	--	--	--	--	S	Function unknown	Uncharacterized protein TCAP_00904 [Tolypocladium capitatum]
OCS_06956	[P]	Inorganic ion transport and metabolism	Molecular Function: superoxide dismutase activity (GO:0004784);; Cellular Component: cytoplasm (GO:0005737);; Biological Process: removal of superoxide radicals (GO:0019430);; Molecular Function: metal ion binding (GO:0046872);; Biological Process: oxidation-reduction process (GO:0055114);;	K04565|1.97395e-28|maw:MAC_04849|K04565 superoxide dismutase, Cu-Zn family [EC:1.15.1.1] | (RefSeq) Superoxide dismutase	Peroxisome (ko04146)	Copper/zinc superoxide dismutase (SODC)	Superoxide dismutase [Cu-Zn] OS=Isaria tenuipes OX=45847 GN=SOD1 PE=3 SV=3	P	Inorganic ion transport and metabolism	Superoxide dismutase [Ophiocordyceps sinensis CO18]
OCS_05741	[G]	Carbohydrate transport and metabolism	Cellular Component: nucleus (GO:0005634);; Cellular Component: cytoplasm (GO:0005737);; Biological Process: carbohydrate metabolic process (GO:0005975);; Molecular Function: carbohydrate binding (GO:0030246);; Molecular Function: glucose-6-phosphate 1-epimerase activity (GO:0047938);;	K01792|6.68192e-164|maw:MAC_07642|K01792 glucose-6-phosphate 1-epimerase [EC:5.1.3.15] | (RefSeq) Aldose 1-epimerase family protein	Glycolysis / Gluconeogenesis (ko00010);; Biosynthesis of antibiotics (ko01130)	Aldose 1-epimerase	Glucose-6-phosphate 1-epimerase OS=Saccharomyces cerevisiae (strain ATCC 204508 / S288c) OX=559292 GN=YMR099C PE=1 SV=1	G	Carbohydrate transport and metabolism	Aldose 1-epimerase family protein [Ophiocordyceps sinensis CO18]
OCS_00838	--	--	Cellular Component: integral component of membrane (GO:0016021);;	--	--	--	--	S	Function unknown	centromere/microtubule binding protein cbf5-like protein [Ophiocordyceps sinensis CO18]
OCS_04421	[H]	Coenzyme transport and metabolism	Molecular Function: ligase activity (GO:0016874);;	--	--	--	--	Q	Secondary metabolites biosynthesis, transport and catabolism	AMP-dependent synthetase/ligase [Ophiocordyceps sinensis CO18]
Ophiocordyceps_sinensis_newGene_3141	--	--	--	--	--	--	--	--	--	hypothetical protein HIM_12126 [Hirsutella minnesotensis 3608]
Ophiocordyceps_sinensis_newGene_3813	[L]	Replication, recombination and repair	Molecular Function: nucleotide binding (GO:0000166);; Biological Process: DNA metabolic process (GO:0006259);; Cellular Component: intracellular membrane-bounded organelle (GO:0043231);; Cellular Component: chromosomal part (GO:0044427);; Biological Process: chromosome organization (GO:0051276);;	K11269|2.64415e-167|maj:MAA_01132|K11269 chromosome transmission fidelity protein 18 | (RefSeq) ATPase, AAA-type, core	--	ATPase family associated with various cellular activities (AAA);; AAA domain;; AAA domain (dynein-related subfamily);; NTPase;; Holliday junction DNA helicase ruvB N-terminus;; FMN-dependent dehydrogenase	Chromosome transmission fidelity protein 18 OS=Emericella nidulans (strain FGSC A4 / ATCC 38163 / CBS 112.46 / NRRL 194 / M139) OX=227321 GN=ctf18 PE=3 SV=1	O	Posttranslational modification, protein turnover, chaperones	hypothetical protein HIM_02699 [Hirsutella minnesotensis 3608]
OCS_00482	--	--	Molecular Function: RNA polymerase II transcription factor activity, sequence-specific DNA binding (GO:0000981);; Cellular Component: nucleus (GO:0005634);; Biological Process: regulation of transcription from RNA polymerase II promoter (GO:0006357);; Molecular Function: zinc ion binding (GO:0008270);;	--	--	Fungal specific transcription factor domain;; Fungal Zn(2)-Cys(6) binuclear cluster domain	ustiloxin B cluster transcription factor ustR OS=Aspergillus flavus (strain ATCC 200026 / FGSC A1120 / NRRL 3357 / JCM 12722 / SRRC 167) OX=332952 GN=ustR PE=3 SV=2	S	Function unknown	PRO1A C6 Zink-finger protein [Ophiocordyceps sinensis CO18]
OCS_01791	--	--	--	--	--	--	--	--	--	hypothetical protein OCS_01791 [Ophiocordyceps sinensis CO18]
OCS_06172	--	--	--	--	--	--	--	S	Function unknown	hypothetical protein OCS_06172 [Ophiocordyceps sinensis CO18]
OCS_06971	--	--	--	--	--	--	--	--	--	hypothetical protein OCS_06971 [Ophiocordyceps sinensis CO18]
Ophiocordyceps_sinensis_newGene_3026	--	--	--	--	--	--	Sillucin OS=Rhizomucor pusillus OX=4840 PE=1 SV=1	--	--	--
Ophiocordyceps_sinensis_newGene_1122	--	--	--	--	--	--	--	S	Function unknown	hypothetical protein HIM_01766 [Hirsutella minnesotensis 3608]
OCS_01902	--	--	Molecular Function: transferase activity (GO:0016740);;	--	--	Methyltransferase domain;; Methyltransferase domain	Secondary metabolism regulator LAE1 OS=Cochliobolus heterostrophus (strain C5 / ATCC 48332 / race O) OX=701091 GN=LAE1 PE=3 SV=1	S	Function unknown	hypothetical protein OCS_01902 [Ophiocordyceps sinensis CO18]
OCS_01581	[V]	Defense mechanisms	Molecular Function: ATP binding (GO:0005524);; Cellular Component: integral component of membrane (GO:0016021);; Molecular Function: ATPase activity, coupled to transmembrane movement of substances (GO:0042626);; Biological Process: transmembrane transport (GO:0055085);;	--	--	ABC transporter;; ABC transporter transmembrane region;; AAA domain, putative AbiEii toxin, Type IV TA system	ABC transporter FUM19 OS=Gibberella moniliformis (strain M3125 / FGSC 7600) OX=334819 GN=FUM19 PE=2 SV=1	V	Defense mechanisms	ABC transporter [Ophiocordyceps sinensis CO18]
Ophiocordyceps_sinensis_newGene_3023	--	--	--	--	--	--	--	--	--	hypothetical protein THITE_160123 [Thielavia terrestris NRRL 8126]
Ophiocordyceps_sinensis_newGene_2549	--	--	--	--	--	--	--	--	--	hypothetical protein XA68_17594 [Ophiocordyceps unilateralis]
OCS_00172	--	--	Molecular Function: glutamate decarboxylase activity (GO:0004351);; Biological Process: glutamate metabolic process (GO:0006536);; Molecular Function: pyridoxal phosphate binding (GO:0030170);;	K01580|5.62035e-23|maw:MAC_05762|K01580 glutamate decarboxylase [EC:4.1.1.15] | (RefSeq) glutamate decarboxylase	Alanine, aspartate and glutamate metabolism (ko00250);; beta-Alanine metabolism (ko00410);; Taurine and hypotaurine metabolism (ko00430);; Butanoate metabolism (ko00650)	--	--	E	Amino acid transport and metabolism	glutamate decarboxylase [Ophiocordyceps sinensis CO18]
Ophiocordyceps_sinensis_newGene_3404	--	--	--	--	--	--	--	--	--	hypothetical protein OCS_06059 [Ophiocordyceps sinensis CO18]
OCS_01904	--	--	--	--	--	--	--	S	Function unknown	hypothetical protein OCS_01904 [Ophiocordyceps sinensis CO18]
OCS_00346	[L]	Replication, recombination and repair	Molecular Function: uracil DNA N-glycosylase activity (GO:0004844);; Cellular Component: nucleus (GO:0005634);; Biological Process: DNA repair (GO:0006281);; Molecular Function: hypoxanthine DNA N-glycosylase activity (GO:0097507);; Molecular Function: xanthine DNA N-glycosylase activity (GO:0097508);; Molecular Function: oxanine DNA N-glycosylase activity (GO:0097509);;	K20813|1.78074e-58|cmt:CCM_05432|K20813 thymine-DNA glycosylase [EC:3.2.2.29] | (RefSeq) mismatch-specific thymine-DNA glycosylase, putative	Base excision repair (ko03410)	Uracil DNA glycosylase superfamily	G/U mismatch-specific uracil DNA glycosylase OS=Schizosaccharomyces pombe (strain 972 / ATCC 24843) OX=284812 GN=thp1 PE=3 SV=1	L	Replication, recombination and repair	DNA glycosylase, G/T mismatch [Ophiocordyceps sinensis CO18]
OCS_04816	[R]	General function prediction only	Molecular Function: endonuclease activity (GO:0004519);; Molecular Function: exonuclease activity (GO:0004527);; Biological Process: nucleic acid phosphodiester bond hydrolysis (GO:0090305);;	--	--	Endonuclease/Exonuclease/phosphatase family	--	S	Function unknown	Endonuclease/Exonuclease/phosphatase family protein [Ophiocordyceps sinensis CO18]
OCS_01342	[G]	Carbohydrate transport and metabolism	Biological Process: carbohydrate transport (GO:0008643);; Cellular Component: integral component of membrane (GO:0016021);; Molecular Function: substrate-specific transmembrane transporter activity (GO:0022891);; Biological Process: transmembrane transport (GO:0055085);;	--	--	Sugar (and other) transporter;; Major Facilitator Superfamily;; Fungal trichothecene efflux pump (TRI12)	Myo-inositol transporter 2 OS=Schizosaccharomyces pombe (strain 972 / ATCC 24843) OX=284812 GN=itr2 PE=2 SV=1	G	Carbohydrate transport and metabolism	General substrate transporter [Ophiocordyceps sinensis CO18]
Ophiocordyceps_sinensis_newGene_2688	[FH]	Nucleotide transport and metabolism;; Coenzyme transport and metabolism	Molecular Function: RNA polymerase II transcription factor activity, sequence-specific DNA binding (GO:0000981);; Molecular Function: DNA binding (GO:0003677);; Molecular Function: transporter activity (GO:0005215);; Cellular Component: nucleus (GO:0005634);; Biological Process: regulation of transcription from RNA polymerase II promoter (GO:0006357);; Molecular Function: zinc ion binding (GO:000…	K03457|0|nhe:NECHADRAFT_30409|K03457 nucleobase:cation symporter-1, NCS1 family | (RefSeq) hypothetical protein	--	Permease for cytosine/purines, uracil, thiamine, allantoin	Transporter aclS OS=Aspergillus oryzae (strain ATCC 42149 / RIB 40) OX=510516 GN=aclS PE=3 SV=1	FH	Nucleotide transport and metabolism;; Coenzyme transport and metabolism	hypothetical protein CDD83_9184 [Cordyceps sp. RAO-2017]
OCS_03838	[IQR]	Lipid transport and metabolism;; Secondary metabolites biosynthesis, transport and catabolism;; General function prediction only	Cellular Component: integral component of membrane (GO:0016021);;	--	--	short chain dehydrogenase;; Enoyl-(Acyl carrier protein) reductase;; KR domain	Short-chain dehydrogenase/reductase SAT3 OS=Stachybotrys chartarum (strain CBS 109288 / IBT 7711) OX=1280523 GN=SAT3 PE=3 SV=1	S	Function unknown	gluconate 5-dehydrogenase [Ophiocordyceps sinensis CO18]
OCS_02785	[G]	Carbohydrate transport and metabolism	Molecular Function: catalytic activity (GO:0003824);;	--	--	HpcH/HpaI aldolase/citrate lyase family	--	G	Carbohydrate transport and metabolism	macrophomate synthase [Ophiocordyceps sinensis CO18]
Ophiocordyceps_sinensis_newGene_442	--	--	--	--	--	--	--	--	--	hypothetical protein HIM_09983 [Hirsutella minnesotensis 3608]
OCS_00794	--	--	Molecular Function: heme binding (GO:0020037);; Molecular Function: dioxygenase activity (GO:0051213);; Biological Process: oxidation-reduction process (GO:0055114);;	K00463|0|nhe:NECHADRAFT_85363|K00463 indoleamine 2,3-dioxygenase [EC:1.13.11.52] | (RefSeq) hypothetical protein	Tryptophan metabolism (ko00380)	Indoleamine 2,3-dioxygenase	Indoleamine 2,3-dioxygenase OS=Saccharomyces cerevisiae (strain ATCC 204508 / S288c) OX=559292 GN=BNA2 PE=1 SV=1	I	Lipid transport and metabolism	indoleamine 2,3-dioxygenase pyrrole 2,3-dioxygenase [Ophiocordyceps sinensis CO18]
Ophiocordyceps_sinensis_newGene_2779	--	--	--	--	--	--	--	--	--	hypothetical protein CDD83_7722 [Cordyceps sp. RAO-2017]
Ophiocordyceps_sinensis_newGene_4359	[F]	Nucleotide transport and metabolism	Molecular Function: transporter activity (GO:0005215);; Cellular Component: integral component of membrane (GO:0016021);; Biological Process: transmembrane transport (GO:0055085);;	K03458|0|maj:MAA_06864|K03458 nucleobase:cation symporter-2, NCS2 family | (RefSeq) purine permease	--	Permease family	Uric acid-xanthine permease OS=Emericella nidulans (strain FGSC A4 / ATCC 38163 / CBS 112.46 / NRRL 194 / M139) OX=227321 GN=uapA PE=1 SV=3	F	Nucleotide transport and metabolism	Uric acid-xanthine permease [Hirsutella minnesotensis 3608]
OCS_05475	--	--	Molecular Function: hydrolase activity, hydrolyzing O-glycosyl compounds (GO:0004553);; Cellular Component: cell wall (GO:0005618);; Biological Process: carbohydrate metabolic process (GO:0005975);; Biological Process: cell wall organization (GO:0071555);;	--	--	Glycosyl hydrolases family 16	Probable glycosidase crf1 OS=Neosartorya fumigata (strain ATCC MYA-4609 / Af293 / CBS 101355 / FGSC A1100) OX=330879 GN=crf1 PE=1 SV=2	G	Carbohydrate transport and metabolism	glycoside hydrolase family 16 protein [Ophiocordyceps sinensis CO18]
Ophiocordyceps_sinensis_newGene_1835	--	--	--	--	--	--	--	S	Function unknown	telomere-associated recQ-like helicase [Metarhizium guizhouense ARSEF 977]
Ophiocordyceps_sinensis_newGene_620	--	--	--	--	--	HNH endonuclease	--	S	Function unknown	hypothetical protein OCS_03788 [Ophiocordyceps sinensis CO18]
OCS_02463	--	--	--	--	--	Protein of unknown function (DUF3455)	--	S	Function unknown	malate dehydrogenase [Ophiocordyceps sinensis CO18]
OCS_00135	--	--	--	--	--	CENP-Q, a CENPA-CAD centromere complex subunit	--	--	--	hypothetical protein OCS_00135 [Ophiocordyceps sinensis CO18]
OCS_04985	--	--	--	--	--	--	--	S	Function unknown	hypothetical protein OCS_04985 [Ophiocordyceps sinensis CO18]
Ophiocordyceps_sinensis_newGene_2620	[R]	General function prediction only	Molecular Function: nuclease activity (GO:0004518);;	--	--	--	--	S	Function unknown	hypothetical protein HIM_06783 [Hirsutella minnesotensis 3608]
Ophiocordyceps_sinensis_newGene_4287	[C]	Energy production and conversion	Molecular Function: DNA binding (GO:0003677);; Molecular Function: biotin carboxylase activity (GO:0004075);; Molecular Function: pyruvate carboxylase activity (GO:0004736);; Molecular Function: ATP binding (GO:0005524);; Cellular Component: cytosol (GO:0005829);; Biological Process: pyruvate metabolic process (GO:0006090);; Biological Process: gluconeogenesis (GO:0006094);; Molecular Function: b…	K01958|0|cmt:CCM_03243|K01958 pyruvate carboxylase [EC:6.4.1.1] | (RefSeq) pyruvate carboxylase	Citrate cycle (TCA cycle) (ko00020);; Pyruvate metabolism (ko00620);; Carbon metabolism (ko01200);; Biosynthesis of amino acids (ko01230)	Carbamoyl-phosphate synthase L chain, ATP binding domain;; Biotin carboxylase C-terminal domain;; ATP-grasp domain;; Biotin carboxylase, N-terminal domain	Pyruvate carboxylase 2 OS=Saccharomyces cerevisiae (strain ATCC 204508 / S288c) OX=559292 GN=PYC2 PE=1 SV=2	C	Energy production and conversion	hypothetical protein XA68_15049 [Ophiocordyceps unilateralis]
OCS_06921	--	--	--	--	--	--	--	--	--	hypothetical protein OCS_06921 [Ophiocordyceps sinensis CO18]
OCS_00959	[Q]	Secondary metabolites biosynthesis, transport and catabolism	Molecular Function: hydrolase activity, acting on carbon-nitrogen (but not peptide) bonds (GO:0016810);;	--	--	Amidohydrolase family;; Amidohydrolase family	Uncharacterized protein YJL213W OS=Saccharomyces cerevisiae (strain ATCC 204508 / S288c) OX=559292 GN=YJL213W PE=3 SV=1	Q	Secondary metabolites biosynthesis, transport and catabolism	amidohydrolase [Ophiocordyceps sinensis CO18]
OCS_03747	--	--	Cellular Component: integral component of membrane (GO:0016021);;	--	--	--	--	--	--	hypothetical protein OCS_03747 [Ophiocordyceps sinensis CO18]
OCS_06086	[GHR]	Carbohydrate transport and metabolism;; Coenzyme transport and metabolism;; General function prediction only	Molecular Function: magnesium ion binding (GO:0000287);; Molecular Function: RNA binding (GO:0003723);; Molecular Function: carboxy-lyase activity (GO:0016831);; Molecular Function: thiamine pyrophosphate binding (GO:0030976);;	K01568|0|tre:TRIREDRAFT_121534|K01568 pyruvate decarboxylase [EC:4.1.1.1] | (RefSeq) pyruvate decarboxylase	Glycolysis / Gluconeogenesis (ko00010);; Biosynthesis of antibiotics (ko01130)	Thiamine pyrophosphate enzyme, N-terminal TPP binding domain;; Thiamine pyrophosphate enzyme, central domain;; Thiamine pyrophosphate enzyme, C-terminal TPP binding domain	Pyruvate decarboxylase OS=Emericella nidulans (strain FGSC A4 / ATCC 38163 / CBS 112.46 / NRRL 194 / M139) OX=227321 GN=pdcA PE=3 SV=3	GH	Carbohydrate transport and metabolism;; Coenzyme transport and metabolism	pyruvate decarboxylase [Ophiocordyceps sinensis CO18]
Ophiocordyceps_sinensis_newGene_1918	--	--	Biological Process: transcription, RNA-templated (GO:0001172);; Molecular Function: DNA binding (GO:0003677);; Molecular Function: DNA-directed 5'-3' RNA polymerase activity (GO:0003899);; Cellular Component: DNA-directed RNA polymerase II, core complex (GO:0005665);; Cellular Component: cytosol (GO:0005829);; Biological Process: transcription from RNA polymerase II promoter (GO:0006366);; Biolog…	K03006|6.68993e-09|tre:TRIREDRAFT_79315|K03006 DNA-directed RNA polymerase II subunit RPB1 [EC:2.7.7.6] | (RefSeq) hypothetical protein	Purine metabolism (ko00230);; Pyrimidine metabolism (ko00240);; RNA polymerase (ko03020)	RNA polymerase Rpb1 C-terminal repeat	--	K	Transcription	hypothetical protein XA68_12236 [Ophiocordyceps unilateralis]
OCS_01079	--	--	--	--	--	Hydrophobic surface binding protein A	Cell wall mannoprotein 1 OS=Neosartorya fumigata OX=746128 GN=MP1 PE=1 SV=1	S	Function unknown	Cell wall galactomannoprotein [Ophiocordyceps sinensis CO18]
OCS_02882	--	--	Molecular Function: cystathionine beta-synthase activity (GO:0004122);; Cellular Component: mitochondrion (GO:0005739);; Biological Process: cysteine biosynthetic process from serine (GO:0006535);; Biological Process: traversing start control point of mitotic cell cycle (GO:0007089);; Biological Process: cysteine biosynthetic process via cystathionine (GO:0019343);; Biological Process: transsulfu…	K01697|2.59416e-36|fgr:FGSG_06544|K01697 cystathionine beta-synthase [EC:4.2.1.22] | (RefSeq) cystathionine beta-synthase	Glycine, serine and threonine metabolism (ko00260);; Cysteine and methionine metabolism (ko00270);; Biosynthesis of antibiotics (ko01130);; Biosynthesis of amino acids (ko01230)	--	Cystathionine beta-synthase OS=Saccharomyces cerevisiae (strain ATCC 204508 / S288c) OX=559292 GN=CYS4 PE=1 SV=1	E	Amino acid transport and metabolism	cystathionine beta-synthase [Ophiocordyceps sinensis CO18]
OCS_05925	--	--	Biological Process: ascospore-type prospore assembly (GO:0031321);;	K19950|2.1729e-84|cmt:CCM_06670|K19950 protein transport protein SEC9 | (RefSeq) plasma membrane SNARE protein (Sec9)	--	--	Protein transport protein SEC9 OS=Yarrowia lipolytica (strain CLIB 122 / E 150) OX=284591 GN=SEC9 PE=3 SV=1	U	Intracellular trafficking, secretion, and vesicular transport	plasma membrane SNARE protein (Sec9) [Ophiocordyceps sinensis CO18]
OCS_04062	[G]	Carbohydrate transport and metabolism	Molecular Function: transporter activity (GO:0005215);; Cellular Component: integral component of membrane (GO:0016021);; Biological Process: transmembrane transport (GO:0055085);;	--	--	Major Facilitator Superfamily	Efflux pump azaK OS=Aspergillus niger (strain ATCC 1015 / CBS 113.46 / FGSC A1144 / LSHB Ac4 / NCTC 3858a / NRRL 328 / USDA 3528.7) OX=380704 GN=azaK PE=2 SV=1	G	Carbohydrate transport and metabolism	Major facilitator superfamily transporter [Ophiocordyceps sinensis CO18]
OCS_06453	--	--	--	--	--	--	--	S	Function unknown	hypothetical protein OCS_06453 [Ophiocordyceps sinensis CO18]
OCS_00216	--	--	--	--	--	--	--	--	--	hypothetical protein OCS_00216 [Ophiocordyceps sinensis CO18]
OCS_00451	--	--	Molecular Function: ATP binding (GO:0005524);;	K20803|8.57336e-154|maw:MAC_03089|K20803 ubiquitin-protein ligase E3 D [EC:2.3.2.26] | (RefSeq) hypothetical protein	--	HECT-like Ubiquitin-conjugating enzyme (E2)-binding	Uncharacterized protein YJR141W OS=Saccharomyces cerevisiae (strain ATCC 204508 / S288c) OX=559292 GN=YJR141W PE=4 SV=1	S	Function unknown	Ubiquitin-conjugating enzyme E2C-binding protein [Ophiocordyceps sinensis CO18]
OCS_02754	--	--	--	--	--	--	--	--	--	hypothetical protein OCS_02754 [Ophiocordyceps sinensis CO18]
OCS_06258	--	--	--	--	--	--	--	--	--	hypothetical protein OCS_06258 [Ophiocordyceps sinensis CO18]
Ophiocordyceps_sinensis_newGene_3800	[I]	Lipid transport and metabolism	Biological Process: metabolic process (GO:0008152);; Molecular Function: transferase activity, transferring acyl groups other than amino-acyl groups (GO:0016747);;	K07513|1.60953e-78|maw:MAC_01176|K07513 acetyl-CoA acyltransferase 1 [EC:2.3.1.16] | (RefSeq) 3-ketoacyl-CoA thiolase	--	Thiolase, N-terminal domain	3-ketoacyl-CoA thiolase B, peroxisomal OS=Candida tropicalis OX=5482 PE=3 SV=1	I	Lipid transport and metabolism	acetyl-CoA acetyltransferase [Ophiocordyceps sinensis CO18]
Ophiocordyceps_sinensis_newGene_4122	--	--	--	--	--	--	--	S	Function unknown	hypothetical protein FPSE_04359 [Fusarium pseudograminearum CS3096]
Ophiocordyceps_sinensis_newGene_3729	--	--	--	--	--	--	--	--	--	hypothetical protein OCS_06059 [Ophiocordyceps sinensis CO18]
OCS_06928	--	--	--	--	--	--	--	--	--	hypothetical protein OCS_06928 [Ophiocordyceps sinensis CO18]
OCS_01194	--	--	Molecular Function: arylesterase activity (GO:0004064);; Cellular Component: membrane (GO:0016020);;	--	--	Arylesterase	--	S	Function unknown	serum paraoxonase/arylesterase family protein [Ophiocordyceps sinensis CO18]
OCS_03839	[IQR]	Lipid transport and metabolism;; Secondary metabolites biosynthesis, transport and catabolism;; General function prediction only	Molecular Function: oxidoreductase activity (GO:0016491);; Biological Process: oxidation-reduction process (GO:0055114);;	--	--	Enoyl-(Acyl carrier protein) reductase;; short chain dehydrogenase	Short-chain dehydrogenase/reductase SAT3 OS=Stachybotrys chartarum (strain CBS 109288 / IBT 7711) OX=1280523 GN=SAT3 PE=3 SV=1	S	Function unknown	short chain dehydrogenase/reductase [Ophiocordyceps sinensis CO18]
Ophiocordyceps_sinensis_newGene_605	[E]	Amino acid transport and metabolism	Biological Process: negative regulation of transcription from RNA polymerase II promoter (GO:0000122);; Molecular Function: RNA polymerase II core promoter proximal region sequence-specific DNA binding (GO:0000978);; Molecular Function: single-stranded DNA binding (GO:0003697);; Molecular Function: mRNA binding (GO:0003729);; Molecular Function: cysteine-type endopeptidase activity (GO:0004197);;…	K01372|0|fpu:FPSE_07720|K01372 bleomycin hydrolase [EC:3.4.22.40] | (RefSeq) hypothetical protein	--	Peptidase C1-like family	Cysteine proteinase 1, mitochondrial OS=Saccharomyces cerevisiae (strain JAY291) OX=574961 GN=LAP3 PE=3 SV=2	E	Amino acid transport and metabolism	Bleomycin hydrolase [Tolypocladium paradoxum]
OCS_02138	[O]	Posttranslational modification, protein turnover, chaperones	Molecular Function: DNA replication origin binding (GO:0003688);; Molecular Function: single-stranded DNA binding (GO:0003697);; Molecular Function: actin binding (GO:0003779);; Molecular Function: ATP binding (GO:0005524);; Cellular Component: mitochondrial intermembrane space (GO:0005758);; Biological Process: 'de novo' protein folding (GO:0006458);; Molecular Function: ATPase activity (GO:0016…	K04077|0|tre:TRIREDRAFT_119731|K04077 chaperonin GroEL | (RefSeq) hsp60 mitochondrial precursor-like protein	RNA degradation (ko03018)	TCP-1/cpn60 chaperonin family	Heat shock protein 60 OS=Emericella nidulans (strain FGSC A4 / ATCC 38163 / CBS 112.46 / NRRL 194 / M139) OX=227321 GN=hsp60 PE=1 SV=1	O	Posttranslational modification, protein turnover, chaperones	hsp60 mitochondrial precursor-like protein [Ophiocordyceps sinensis CO18]
OCS_03002	[QV]	Secondary metabolites biosynthesis, transport and catabolism;; Defense mechanisms	Molecular Function: monooxygenase activity (GO:0004497);; Molecular Function: iron ion binding (GO:0005506);; Cellular Component: integral component of membrane (GO:0016021);; Molecular Function: oxidoreductase activity, acting on paired donors, with incorporation or reduction of molecular oxygen (GO:0016705);; Molecular Function: heme binding (GO:0020037);; Biological Process: oxidation-reductio…	--	--	Cytochrome P450	Versicolorin B desaturase OS=Emericella nidulans (strain FGSC A4 / ATCC 38163 / CBS 112.46 / NRRL 194 / M139) OX=227321 GN=stcL PE=1 SV=2	Q	Secondary metabolites biosynthesis, transport and catabolism	Cytochrome P450 [Ophiocordyceps sinensis CO18]
OCS_02200	[H]	Coenzyme transport and metabolism	Molecular Function: catalytic activity (GO:0003824);; Biological Process: vitamin B6 biosynthetic process (GO:0042819);; Biological Process: pyridoxal phosphate biosynthetic process (GO:0042823);;	K06215|2.47568e-90|cmt:CCM_03579|K06215 pyridoxal 5'-phosphate synthase pdxS subunit [EC:4.3.3.6] | (RefSeq) pyridoxine biosynthesis protein	Vitamin B6 metabolism (ko00750)	SOR/SNZ family;; Thiazole biosynthesis protein ThiG	Pyridoxal 5&apos;-phosphate synthase subunit PDX1 OS=Cercospora nicotianae OX=29003 GN=PDX1 PE=1 SV=1	H	Coenzyme transport and metabolism	pyridoxine biosynthesis protein [Ophiocordyceps sinensis CO18]
OCS_04728	--	--	--	--	--	--	--	--	--	hypothetical protein OCS_04728 [Ophiocordyceps sinensis CO18]
OCS_05100	--	--	Biological Process: carbohydrate metabolic process (GO:0005975);; Cellular Component: integral component of membrane (GO:0016021);; Molecular Function: hydrolase activity (GO:0016787);;	--	--	Glycosyl hydrolase catalytic core	--	S	Function unknown	F5/8 type C domain protein [Ophiocordyceps sinensis CO18]
OCS_06071	--	--	Molecular Function: binding (GO:0005488);;	--	--	--	--	S	Function unknown	C2H2 transcription factor [Ophiocordyceps sinensis CO18]
OCS_02768	[G]	Carbohydrate transport and metabolism	Molecular Function: hydrolase activity (GO:0016787);;	--	--	Glycosyl hydrolase family 76;; Glycosyl Hydrolase Family 88	Mannan endo-1,6-alpha-mannosidase DFG5 OS=Saccharomyces cerevisiae (strain ATCC 204508 / S288c) OX=559292 GN=DFG5 PE=1 SV=1	G	Carbohydrate transport and metabolism	glycosyl hydrolase [Ophiocordyceps sinensis CO18]
OCS_01583	[Q]	Secondary metabolites biosynthesis, transport and catabolism	Molecular Function: catalytic activity (GO:0003824);; Biological Process: metabolic process (GO:0008152);; Molecular Function: phosphopantetheine binding (GO:0031177);;	--	--	AMP-binding enzyme;; Condensation domain;; Phosphopantetheine attachment site;; AMP-binding enzyme C-terminal domain	Nonribosomal peptide synthetase vlms OS=Lecanicillium sp. OX=1756136 GN=vlmS PE=3 SV=1	Q	Secondary metabolites biosynthesis, transport and catabolism	non-ribosomal peptide synthetase [Ophiocordyceps sinensis CO18]
OCS_04012	--	--	Cellular Component: integral component of membrane (GO:0016021);; Biological Process: metal ion transport (GO:0030001);; Molecular Function: metal ion transmembrane transporter activity (GO:0046873);; Biological Process: transmembrane transport (GO:0055085);;	K16075|0|maw:MAC_00909|K16075 magnesium transporter | (RefSeq) inner membrane magnesium transporter MRS2 precursor	--	CorA-like Mg2+ transporter protein	Mitochondrial inner membrane magnesium transporter MRS2 OS=Gibberella zeae (strain PH-1 / ATCC MYA-4620 / FGSC 9075 / NRRL 31084) OX=229533 GN=MRS2 PE=3 SV=2	U	Intracellular trafficking, secretion, and vesicular transport	inner membrane magnesium transporter MRS2 precursor [Ophiocordyceps sinensis CO18]
OCS_03585	--	--	Molecular Function: ubiquitin-protein transferase activity (GO:0004842);; Biological Process: protein ubiquitination (GO:0016567);; Molecular Function: ligase activity (GO:0016874);;	K10589|0|maw:MAC_03483|K10589 ubiquitin-protein ligase E3 C [EC:2.3.2.26] | (RefSeq) E3 ubiquitin-protein ligase	Ubiquitin mediated proteolysis (ko04120)	HECT-domain (ubiquitin-transferase)	Probable E3 ubiquitin protein ligase C167.07c OS=Schizosaccharomyces pombe (strain 972 / ATCC 24843) OX=284812 GN=SPAC167.07c PE=2 SV=1	O	Posttranslational modification, protein turnover, chaperones	E3 ubiquitin-protein ligase [Ophiocordyceps sinensis CO18]
OCS_03941	--	--	--	--	--	--	--	--	--	hypothetical protein OCS_03941 [Ophiocordyceps sinensis CO18]
OCS_01323	[Q]	Secondary metabolites biosynthesis, transport and catabolism	Molecular Function: catalytic activity (GO:0003824);; Biological Process: metabolic process (GO:0008152);;	--	--	AMP-binding enzyme;; Condensation domain;; Phosphopantetheine attachment site;; AMP-binding enzyme C-terminal domain	Nonribosomal peptide synthetase dtxS1 OS=Metarhizium robertsii (strain ARSEF 23 / ATCC MYA-3075) OX=655844 GN=dtxS1 PE=1 SV=2	Q	Secondary metabolites biosynthesis, transport and catabolism	peramine synthetase [Ophiocordyceps sinensis CO18]
OCS_04589	[J]	Translation, ribosomal structure and biogenesis	Biological Process: generation of catalytic spliceosome for first transesterification step (GO:0000349);; Molecular Function: nucleic acid binding (GO:0003676);; Molecular Function: ATP binding (GO:0005524);; Molecular Function: ATP-dependent helicase activity (GO:0008026);; Molecular Function: RNA-dependent ATPase activity (GO:0008186);; Biological Process: snoRNA splicing (GO:0034247);;	K12813|0|maj:MAA_03230|K12813 pre-mRNA-splicing factor ATP-dependent RNA helicase DHX16 [EC:3.6.4.13] | (RefSeq) helicase associated domain-containing protein	Spliceosome (ko03040)	Helicase associated domain (HA2);; Helicase conserved C-terminal domain	Pre-mRNA-splicing factor ATP-dependent RNA helicase-like protein cdc28 OS=Schizosaccharomyces pombe (strain 972 / ATCC 24843) OX=284812 GN=cdc28 PE=3 SV=2	L	Replication, recombination and repair	ATP-dependent RNA helicase DHX8 [Ophiocordyceps sinensis CO18]
OCS_04669	--	--	--	--	--	Thioredoxin	--	S	Function unknown	Thioredoxin-like protein [Ophiocordyceps sinensis CO18]
Ophiocordyceps_sinensis_newGene_2308	--	--	Molecular Function: oxidoreductase activity (GO:0016491);;	K00480|7.96187e-18|maw:MAC_08889|K00480 salicylate hydroxylase [EC:1.14.13.1] | (RefSeq) hypothetical protein	--	--	--	CH	Energy production and conversion;; Coenzyme transport and metabolism	6-hydroxynicotinate 3-monooxygenase [Tolypocladium paradoxum]
OCS_01324	[E]	Amino acid transport and metabolism	Molecular Function: oxidoreductase activity (GO:0016491);; Biological Process: oxidation-reduction process (GO:0055114);;	--	--	FAD dependent oxidoreductase	--	E	Amino acid transport and metabolism	FAD dependent oxidoreductase [Ophiocordyceps sinensis CO18]
Ophiocordyceps_sinensis_newGene_1199	--	--	--	--	--	--	--	--	--	hypothetical protein OCS_06059 [Ophiocordyceps sinensis CO18]
OCS_06444	[G]	Carbohydrate transport and metabolism	Molecular Function: hydrolase activity, hydrolyzing O-glycosyl compounds (GO:0004553);; Biological Process: carbohydrate metabolic process (GO:0005975);;	K01179|0|maw:MAC_08328|K01179 endoglucanase [EC:3.2.1.4] | (RefSeq) cellulase family protein	Starch and sucrose metabolism (ko00500)	Cellulase (glycosyl hydrolase family 5)	--	G	Carbohydrate transport and metabolism	cellulase family protein [Ophiocordyceps sinensis CO18]
OCS_01368	--	--	Biological Process: proteolysis (GO:0006508);; Molecular Function: metallopeptidase activity (GO:0008237);;	--	--	--	Extracellular metalloprotease MGYG_03559 OS=Arthroderma gypseum (strain ATCC MYA-4604 / CBS 118893) OX=535722 GN=MGYG_03559 PE=3 SV=1	S	Function unknown	metalloprotease 1 [Ophiocordyceps sinensis CO18]
OCS_03329	--	--	Cellular Component: integral component of membrane (GO:0016021);; Biological Process: transmembrane transport (GO:0055085);;	--	--	Major Facilitator Superfamily	Efflux pump ustT OS=Aspergillus flavus (strain ATCC 200026 / FGSC A1120 / NRRL 3357 / JCM 12722 / SRRC 167) OX=332952 GN=ustT PE=3 SV=1	S	Function unknown	major facilitator superfamily transporter [Ophiocordyceps sinensis CO18]
OCS_06602	--	--	--	--	--	--	--	O	Posttranslational modification, protein turnover, chaperones	serine proteinase [Ophiocordyceps sinensis CO18]
OCS_02039	--	--	--	--	--	--	--	S	Function unknown	hypothetical protein OCS_02039 [Ophiocordyceps sinensis CO18]
OCS_01767	[Q]	Secondary metabolites biosynthesis, transport and catabolism	Molecular Function: oxidoreductase activity (GO:0016491);; Molecular Function: transferase activity (GO:0016740);; Molecular Function: phosphopantetheine binding (GO:0031177);; Biological Process: oxidation-reduction process (GO:0055114);;	--	--	Polyketide synthase dehydratase;; Beta-ketoacyl synthase, N-terminal domain;; KR domain;; Acyl transferase domain;; Methyltransferase domain;; Methyltransferase domain;; Methyltransferase domain;; Methyltransferase domain;; Zinc-binding dehydrogenase;; Methyltransferase domain;; Zinc-binding dehydrogenase;; short chain dehydrogenase;; ubiE/COQ5 methyltransferase family;; Phosphopantetheine attach…	Lovastatin diketide synthase mokB OS=Monascus pilosus OX=89488 GN=mokB PE=1 SV=1	Q	Secondary metabolites biosynthesis, transport and catabolism	phenolpthiocerol synthesis polyketide synthase ppsA [Ophiocordyceps sinensis CO18]
OCS_03335	--	--	Molecular Function: DNA binding (GO:0003677);;	--	--	--	--	S	Function unknown	Homeodomain-like protein [Ophiocordyceps sinensis CO18]
OCS_01646	[E]	Amino acid transport and metabolism	Molecular Function: aminopeptidase activity (GO:0004177);; Biological Process: proteolysis (GO:0006508);; Molecular Function: metallopeptidase activity (GO:0008237);; Molecular Function: manganese ion binding (GO:0030145);;	K14213|1.36792e-33|maj:MAA_08947|K14213 Xaa-Pro dipeptidase [EC:3.4.13.9] | (RefSeq) Xaa-Pro dipeptidase	--	Metallopeptidase family M24	Probable Xaa-Pro aminopeptidase MAA_08947 OS=Metarhizium robertsii (strain ARSEF 23 / ATCC MYA-3075) OX=655844 GN=MAA_08947 PE=3 SV=2	E	Amino acid transport and metabolism	peptidase [Ophiocordyceps sinensis CO18]
OCS_01540	[T]	Signal transduction mechanisms	Cellular Component: integral component of membrane (GO:0016021);; Molecular Function: oxidoreductase activity (GO:0016491);; Biological Process: oxidation-reduction process (GO:0055114);;	K08008|0|maj:MAA_04914|K08008 NADPH oxidase | (RefSeq) NADPH oxidase	Phagosome (ko04145);; AGE-RAGE signaling pathway in diabetic complications (ko04933)	Ferric reductase NAD binding domain;; Ferric reductase like transmembrane component;; FAD-binding domain	--	U	Intracellular trafficking, secretion, and vesicular transport	NADPH oxidase [Ophiocordyceps sinensis CO18]
Ophiocordyceps_sinensis_newGene_1912	--	--	--	--	--	--	--	--	--	hypothetical protein OCS_04972 [Ophiocordyceps sinensis CO18]
OCS_00923	--	--	--	--	--	--	--	L	Replication, recombination and repair	hypothetical protein OCS_00923 [Ophiocordyceps sinensis CO18]
OCS_06163	--	--	Molecular Function: catalytic activity (GO:0003824);; Cellular Component: endoplasmic reticulum membrane (GO:0005789);; Cellular Component: integral component of membrane (GO:0016021);; Biological Process: lipid storage (GO:0019915);;	--	--	Inositol phospholipid synthesis and fat-storage-inducing TM	FIT family protein scs3 OS=Schizosaccharomyces pombe (strain 972 / ATCC 24843) OX=284812 GN=scs3 PE=3 SV=1	S	Function unknown	alpha-galactosidase [Ophiocordyceps sinensis CO18]
OCS_04224	--	--	Cellular Component: integral component of membrane (GO:0016021);; Biological Process: transmembrane transport (GO:0055085);;	--	--	Major Facilitator Superfamily	Efflux pump ustT OS=Aspergillus flavus (strain ATCC 200026 / FGSC A1120 / NRRL 3357 / JCM 12722 / SRRC 167) OX=332952 GN=ustT PE=3 SV=1	I	Lipid transport and metabolism	MFS general substrate transporter [Ophiocordyceps sinensis CO18]
OCS_06225	[P]	Inorganic ion transport and metabolism	Molecular Function: ferroxidase activity (GO:0004322);; Cellular Component: mitochondrion (GO:0005739);; Molecular Function: ferric iron binding (GO:0008199);; Biological Process: iron-sulfur cluster assembly (GO:0016226);; Biological Process: oxidation-reduction process (GO:0055114);;	K19054|1.31605e-39|maw:MAC_03656|K19054 frataxin [EC:1.16.3.1] | (RefSeq) mitochondrial iron uptake protein	Porphyrin and chlorophyll metabolism (ko00860)	Frataxin-like domain	Frataxin homolog, mitochondrial OS=Saccharomyces cerevisiae (strain ATCC 204508 / S288c) OX=559292 GN=YFH1 PE=1 SV=1	P	Inorganic ion transport and metabolism	mitochondrial iron uptake protein [Ophiocordyceps sinensis CO18]
OCS_03836	[R]	General function prediction only	--	--	--	SnoaL-like polyketide cyclase;; SnoaL-like domain	--	S	Function unknown	NTF2-like superfamily protein [Ophiocordyceps sinensis CO18]
OCS_01261	--	--	Molecular Function: ubiquitin-protein transferase activity (GO:0004842);; Molecular Function: zinc ion binding (GO:0008270);; Biological Process: protein ubiquitination (GO:0016567);; Molecular Function: ligase activity (GO:0016874);;	--	--	IBR domain, a half RING-finger domain	E3 ubiquitin-protein ligase itt1 OS=Schizosaccharomyces pombe (strain 972 / ATCC 24843) OX=284812 GN=itt1 PE=4 SV=1	S	Function unknown	zinc finger domain-containing protein [Ophiocordyceps sinensis CO18]
OCS_03061	--	--	--	--	--	Domain of unknown function (DUF4604)	--	S	Function unknown	hypothetical protein OCS_03061 [Ophiocordyceps sinensis CO18]
OCS_03837	[I]	Lipid transport and metabolism	Molecular Function: iron ion binding (GO:0005506);; Biological Process: fatty acid biosynthetic process (GO:0006633);; Cellular Component: integral component of membrane (GO:0016021);; Molecular Function: oxidoreductase activity (GO:0016491);; Biological Process: oxidation-reduction process (GO:0055114);;	K04713|9.77956e-54|yli:YALI0E17347g|K04713 sphinganine C4-monooxygenase [EC:1.14.18.5] | (RefSeq) YALI0E17347p	Sphingolipid metabolism (ko00600)	Fatty acid hydroxylase superfamily	Sphingolipid C4-hydroxylase SUR2 OS=Saccharomyces cerevisiae (strain ATCC 204508 / S288c) OX=559292 GN=SUR2 PE=1 SV=1	I	Lipid transport and metabolism	C4-hydroxylase [Ophiocordyceps sinensis CO18]
OCS_06122	--	--	Molecular Function: transcription factor activity, sequence-specific DNA binding (GO:0003700);; Biological Process: regulation of transcription, DNA-templated (GO:0006355);; Molecular Function: sequence-specific DNA binding (GO:0043565);;	K04450|1.13271e-11|maw:MAC_08741|K04450 cyclic AMP-dependent transcription factor ATF-2 | (RefSeq) transcription factor ATF2	--	bZIP transcription factor;; Basic region leucine zipper	--	K	Transcription	bZIP transcription factor, bZIP-1 [Ophiocordyceps sinensis CO18]
OCS_04268	--	--	Molecular Function: nucleotide binding (GO:0000166);; Molecular Function: kinase activity (GO:0016301);; Biological Process: phosphorylation (GO:0016310);;	--	--	--	Serine/threonine-protein kinase SKY1 OS=Saccharomyces cerevisiae (strain ATCC 204508 / S288c) OX=559292 GN=SKY1 PE=1 SV=1	T	Signal transduction mechanisms	protein kinase domain-containing protein [Ophiocordyceps sinensis CO18]
OCS_00519	--	--	Cellular Component: U2-type spliceosomal complex (GO:0005684);; Cellular Component: cytosol (GO:0005829);;	K12871|3.92926e-59|nhe:NECHADRAFT_80411|K12871 coiled-coil domain-containing protein 12 | (RefSeq) hypothetical protein	Spliceosome (ko03040)	cwf18 pre-mRNA splicing factor	Pre-mRNA-splicing factor cwf18 OS=Schizosaccharomyces pombe (strain 972 / ATCC 24843) OX=284812 GN=cwf18 PE=1 SV=1	S	Function unknown	mRNA splicing factor, Cwf18 [Ophiocordyceps sinensis CO18]
OCS_01070	--	--	--	--	--	--	--	S	Function unknown	Heat Labile Enterotoxin Type Iib [Ophiocordyceps sinensis CO18]
OCS_01071	--	--	--	--	--	--	--	--	--	hypothetical protein OCS_01071 [Ophiocordyceps sinensis CO18]
OCS_06735	[E]	Amino acid transport and metabolism	Molecular Function: aminopeptidase activity (GO:0004177);; Cellular Component: nucleus (GO:0005634);; Biological Process: protein processing (GO:0016485);; Molecular Function: manganese ion binding (GO:0030145);; Cellular Component: extrinsic component of mitochondrial inner membrane (GO:0031314);; Biological Process: protein stabilization (GO:0050821);;	K18573|2.46291e-67|maj:MAA_02070|K18573 intermediate cleaving peptidase 55 [EC:3.4.11.26] | (RefSeq) xaa-pro dipeptidase app	--	Metallopeptidase family M24	Intermediate cleaving peptidase 55 OS=Saccharomyces cerevisiae (strain ATCC 204508 / S288c) OX=559292 GN=ICP55 PE=1 SV=1	E	Amino acid transport and metabolism	xaa-pro dipeptidase app [Ophiocordyceps sinensis CO18]
OCS_02571	--	--	--	--	--	--	--	--	--	hypothetical protein OCS_02571 [Ophiocordyceps sinensis CO18]
OCS_00795	--	--	--	--	--	--	--	--	--	hypothetical protein OCS_00795 [Ophiocordyceps sinensis CO18]
OCS_02777	--	--	--	--	--	--	--	--	--	hypothetical protein OCS_02777 [Ophiocordyceps sinensis CO18]
OCS_01035	--	--	--	--	--	--	--	--	--	hypothetical protein OCS_01035 [Ophiocordyceps sinensis CO18]
OCS_06407	--	--	Molecular Function: kinase activity (GO:0016301);; Biological Process: phosphorylation (GO:0016310);;	--	--	Phosphotransferase enzyme family	--	S	Function unknown	Protein kinase-like domain protein [Ophiocordyceps sinensis CO18]
OCS_02091	--	--	Cellular Component: integral component of membrane (GO:0016021);;	--	--	--	--	S	Function unknown	hypothetical protein OCS_02091 [Ophiocordyceps sinensis CO18]
OCS_03910	--	--	Molecular Function: ATP binding (GO:0005524);; Molecular Function: methyltransferase activity (GO:0008168);; Molecular Function: D-alanine-D-alanine ligase activity (GO:0008716);; Biological Process: methylation (GO:0032259);; Molecular Function: metal ion binding (GO:0046872);;	--	--	Methyltransferase domain;; Methyltransferase domain;; D-ala D-ala ligase C-terminus;; ATP-grasp domain;; PT repeat	--	S	Function unknown	2-C-methyl-D-erythritol 2,4-cyclodiphosphate synthase [Ophiocordyceps sinensis CO18]
Ophiocordyceps_sinensis_newGene_1847	[R]	General function prediction only	--	--	--	Protein of unknown function (DUF4246);; WD domain, G-beta repeat;; Anaphase-promoting complex subunit 4 WD40 domain	Transcriptional repressor rco-1 OS=Neurospora crassa (strain ATCC 24698 / 74-OR23-1A / CBS 708.71 / DSM 1257 / FGSC 987) OX=367110 GN=rco-1 PE=4 SV=2	S	Function unknown	WD40 repeat 2 [Metarhizium robertsii ARSEF 23]
OCS_05187	[R]	General function prediction only	Molecular Function: hydrolase activity, acting on carbon-nitrogen (but not peptide) bonds (GO:0016810);;	--	--	Amidohydrolase family;; Amidohydrolase family	--	S	Function unknown	amidohydrolase family protein [Ophiocordyceps sinensis CO18]
OCS_04100	--	--	--	--	--	--	--	S	Function unknown	hypothetical protein OCS_04100 [Ophiocordyceps sinensis CO18]
OCS_01319	--	--	--	--	--	--	--	S	Function unknown	hypothetical protein OCS_01319 [Ophiocordyceps sinensis CO18]
OCS_04315	--	--	Molecular Function: translation initiation factor activity (GO:0003743);; Biological Process: translational initiation (GO:0006413);; Molecular Function: protein heterodimerization activity (GO:0046982);;	--	--	Transcription factor TFIID complex subunit 8 C-term;; Bromodomain associated	Transcription initiation factor TFIID subunit 8 OS=Schizosaccharomyces pombe (strain 972 / ATCC 24843) OX=284812 GN=taf8 PE=3 SV=1	S	Function unknown	bromodomain associated protein [Ophiocordyceps sinensis CO18]
Ophiocordyceps_sinensis_newGene_2639	--	--	--	--	--	--	--	S	Function unknown	hypothetical protein OCS_00696 [Ophiocordyceps sinensis CO18]
OCS_00067	[C]	Energy production and conversion	Molecular Function: FMN binding (GO:0010181);; Molecular Function: oxidoreductase activity (GO:0016491);; Biological Process: oxidation-reduction process (GO:0055114);;	--	--	NADH:flavin oxidoreductase / NADH oxidase family	NADH-dependent flavin oxidoreductase nadA OS=Aspergillus parasiticus (strain ATCC 56775 / NRRL 5862 / SRRC 143 / SU-1) OX=1403190 GN=nadA PE=2 SV=1	C	Energy production and conversion	NADH:flavin oxidoreductase/NADH oxidase [Ophiocordyceps sinensis CO18]
Ophiocordyceps_sinensis_newGene_4582	--	--	--	--	--	--	--	S	Function unknown	hypothetical protein TOPH_08691 [Tolypocladium ophioglossoides CBS 100239]
OCS_06503	--	--	Cellular Component: integral component of membrane (GO:0016021);;	--	--	--	--	S	Function unknown	hypothetical protein OCS_06503 [Ophiocordyceps sinensis CO18]
OCS_01362	[L]	Replication, recombination and repair	Biological Process: spliceosome conformational change to release U4 (or U4atac) and U1 (or U11) (GO:0000388);; Molecular Function: nucleic acid binding (GO:0003676);; Molecular Function: ATP-dependent RNA helicase activity (GO:0004004);; Molecular Function: ATP binding (GO:0005524);; Cellular Component: spliceosomal complex (GO:0005681);; Cellular Component: U5 snRNP (GO:0005682);; Cellular Compo…	K12854|0|maj:MAA_07215|K12854 pre-mRNA-splicing helicase BRR2 [EC:3.6.4.13] | (RefSeq) pre-mRNA splicing helicase	Spliceosome (ko03040)	Sec63 Brl domain;; DEAD/DEAH box helicase;; Type III restriction enzyme, res subunit;; Helicase conserved C-terminal domain	Pre-mRNA-splicing factor brr2 OS=Schizosaccharomyces pombe (strain 972 / ATCC 24843) OX=284812 GN=brr2 PE=1 SV=1	L	Replication, recombination and repair	Sec63 domain protein [Ophiocordyceps sinensis CO18]
OCS_06676	--	--	--	--	--	--	--	--	--	hypothetical protein OCS_06676 [Ophiocordyceps sinensis CO18]
OCS_04168	[S]	Function unknown	Cellular Component: membrane (GO:0016020);;	K06990|4.27329e-151|maw:MAC_00348|K06990 MEMO1 family protein | (RefSeq) DUF52 domain-containing protein	--	Memo-like protein	MEMO1 family protein YJR008W OS=Saccharomyces cerevisiae (strain ATCC 204508 / S288c) OX=559292 GN=YJR008W PE=1 SV=1	S	Function unknown	DUF52 domain-containing protein [Ophiocordyceps sinensis CO18]
Ophiocordyceps_sinensis_newGene_2243	[T]	Signal transduction mechanisms	Molecular Function: protein kinase activity (GO:0004672);; Molecular Function: ATP binding (GO:0005524);; Biological Process: protein phosphorylation (GO:0006468);;	K03114|0|nhe:NECHADRAFT_69580|K03114 mitosis inhibitor protein kinase SWE1 [EC:2.7.11.1] | (RefSeq) hypothetical protein	MAPK signaling pathway - yeast (ko04011);; Cell cycle - yeast (ko04111);; Meiosis - yeast (ko04113)	Protein kinase domain;; Protein tyrosine kinase	Mitosis inhibitor protein kinase wee1 OS=Schizosaccharomyces pombe (strain 972 / ATCC 24843) OX=284812 GN=wee1 PE=1 SV=1	T	Signal transduction mechanisms	Mitosis inhibitor protein kinase wee1 [Tolypocladium paradoxum]
OCS_00863	--	--	--	--	--	Coiled-coil domain-containing protein 124	Coiled-coil domain-containing protein 124 homolog OS=Schizosaccharomyces pombe (strain 972 / ATCC 24843) OX=284812 GN=SPBC29A10.12 PE=3 SV=1	S	Function unknown	DUF1014 domain protein [Ophiocordyceps sinensis CO18]
Ophiocordyceps_sinensis_newGene_1745	--	--	Molecular Function: N,N-dimethylaniline monooxygenase activity (GO:0004499);; Cellular Component: integral component of membrane (GO:0016021);; Molecular Function: flavin adenine dinucleotide binding (GO:0050660);; Molecular Function: NADP binding (GO:0050661);; Biological Process: oxidation-reduction process (GO:0055114);;	--	--	--	--	P	Inorganic ion transport and metabolism	hypothetical protein DCS_00993 [Drechmeria coniospora]
OCS_05125	--	--	Molecular Function: protein kinase activity (GO:0004672);; Molecular Function: ATP binding (GO:0005524);; Biological Process: protein phosphorylation (GO:0006468);; Cellular Component: integral component of membrane (GO:0016021);;	--	--	--	--	S	Function unknown	serine/threonine-protein kinase Sgk2 [Ophiocordyceps sinensis CO18]
OCS_03000	[G]	Carbohydrate transport and metabolism	Molecular Function: zinc ion binding (GO:0008270);; Molecular Function: oxidoreductase activity (GO:0016491);; Biological Process: oxidation-reduction process (GO:0055114);;	--	--	Alcohol dehydrogenase GroES-like domain;; Zinc-binding dehydrogenase	Alcohol dehydrogenase patD OS=Aspergillus clavatus (strain ATCC 1007 / CBS 513.65 / DSM 816 / NCTC 3887 / NRRL 1) OX=344612 GN=patD PE=1 SV=1	C	Energy production and conversion	Alcohol dehydrogenase superfamily, zinc-type [Ophiocordyceps sinensis CO18]
Ophiocordyceps_sinensis_newGene_2729	[P]	Inorganic ion transport and metabolism	Molecular Function: DNA binding (GO:0003677);; Molecular Function: cyanate hydratase activity (GO:0008824);; Biological Process: cyanate metabolic process (GO:0009439);;	K01725|2.16952e-85|ang:ANI_1_970134|K01725 cyanate lyase [EC:4.2.1.104] | (RefSeq) An15g07070; cyanate hydratase	Nitrogen metabolism (ko00910)	Cyanate lyase C-terminal domain	Cyanate hydratase OS=Emericella nidulans (strain FGSC A4 / ATCC 38163 / CBS 112.46 / NRRL 194 / M139) OX=227321 GN=cyn1 PE=3 SV=2	P	Inorganic ion transport and metabolism	hypothetical protein ASPVEDRAFT_123135 [Aspergillus versicolor CBS 583.65]
OCS_01643	[I]	Lipid transport and metabolism	Biological Process: lipid metabolic process (GO:0006629);; Molecular Function: glycerophosphodiester phosphodiesterase activity (GO:0008889);;	K01126|5.74179e-176|maw:MAC_02366|K01126 glycerophosphoryl diester phosphodiesterase [EC:3.1.4.46] | (RefSeq) glycerophosphoryl diester phosphodiesterase family protein	Glycerophospholipid metabolism (ko00564)	Glycerophosphoryl diester phosphodiesterase family	Extracellular protein ARB_04177 OS=Arthroderma benhamiae (strain ATCC MYA-4681 / CBS 112371) OX=663331 GN=ARB_04177 PE=1 SV=1	I	Lipid transport and metabolism	glycerophosphoryl diester phosphodiesterase family protein [Ophiocordyceps sinensis CO18]
OCS_01998	--	--	--	--	--	--	--	S	Function unknown	ectomycorrhiza-upregulated zf-MYND domain-containing protein [Ophiocordyceps sinensis CO18]
OCS_04932	[I]	Lipid transport and metabolism	Molecular Function: mRNA binding (GO:0003729);; Molecular Function: acetyl-CoA C-acyltransferase activity (GO:0003988);; Cellular Component: mitochondrial intermembrane space (GO:0005758);; Cellular Component: peroxisomal matrix (GO:0005782);; Biological Process: fatty acid beta-oxidation (GO:0006635);;	K07513|0|maj:MAA_02106|K07513 acetyl-CoA acyltransferase 1 [EC:2.3.1.16] | (RefSeq) 3-ketoacyl-CoA thiolase	Fatty acid degradation (ko00071);; Valine, leucine and isoleucine degradation (ko00280);; alpha-Linolenic acid metabolism (ko00592);; Biosynthesis of unsaturated fatty acids (ko01040);; Biosynthesis of antibiotics (ko01130);; Fatty acid metabolism (ko01212);; Peroxisome (ko04146)	Thiolase, N-terminal domain;; Thiolase, C-terminal domain	3-ketoacyl-CoA thiolase, peroxisomal OS=Yarrowia lipolytica (strain CLIB 122 / E 150) OX=284591 GN=POT1 PE=3 SV=1	I	Lipid transport and metabolism	3-ketoacyl-CoA thiolase [Ophiocordyceps sinensis CO18]
OCS_03842	[IQR]	Lipid transport and metabolism;; Secondary metabolites biosynthesis, transport and catabolism;; General function prediction only	--	--	--	short chain dehydrogenase;; KR domain	Short chain dehydrogenase sol3 OS=Alternaria solani OX=48100 GN=sol3 PE=3 SV=1	S	Function unknown	NAD(P)-binding domain protein [Ophiocordyceps sinensis CO18]
OCS_02889	--	--	Molecular Function: DNA binding (GO:0003677);;	--	--	Protein of unknown function (DUF3140)	--	S	Function unknown	DNA-binding protein [Ophiocordyceps sinensis CO18]
OCS_06594	--	--	Cellular Component: nucleus (GO:0005634);;	--	--	--	WD repeat-containing protein JIP5 OS=Podospora anserina (strain S / ATCC MYA-4624 / DSM 980 / FGSC 10383) OX=515849 GN=JIP5 PE=3 SV=1	S	Function unknown	WD repeat-containing protein JIP5 [Ophiocordyceps sinensis CO18]
OCS_01773	--	--	Molecular Function: translation elongation factor activity (GO:0003746);; Molecular Function: protein serine/threonine kinase activity (GO:0004674);; Molecular Function: ATP binding (GO:0005524);; Biological Process: translational elongation (GO:0006414);; Biological Process: protein phosphorylation (GO:0006468);;	--	--	Alpha-kinase family	--	S	Function unknown	MHCK/EF2 kinase [Ophiocordyceps sinensis CO18]
OCS_05203	--	--	Biological Process: metabolic process (GO:0008152);; Cellular Component: integral component of membrane (GO:0016021);; Molecular Function: hydrolase activity (GO:0016787);;	--	--	alpha/beta hydrolase fold;; Steryl acetyl hydrolase	--	I	Lipid transport and metabolism	esterase [Ophiocordyceps sinensis CO18]
OCS_05153	[I]	Lipid transport and metabolism	Biological Process: metabolic process (GO:0008152);; Molecular Function: isomerase activity (GO:0016853);;	K13239|5.19014e-139|maw:MAC_05003|K13239 peroxisomal 3,2-trans-enoyl-CoA isomerase [EC:5.3.3.8] | (RefSeq) 3,2-trans-enoyl-CoA isomerase	Fatty acid degradation (ko00071);; Peroxisome (ko04146)	Enoyl-CoA hydratase/isomerase;; Enoyl-CoA hydratase/isomerase	3,2-trans-enoyl-CoA isomerase OS=Saccharomyces cerevisiae (strain ATCC 204508 / S288c) OX=559292 GN=ECI1 PE=1 SV=1	I	Lipid transport and metabolism	3,2-trans-enoyl-CoA isomerase [Ophiocordyceps sinensis CO18]
Ophiocordyceps_sinensis_newGene_2792	--	--	Molecular Function: ARF guanyl-nucleotide exchange factor activity (GO:0005086);; Biological Process: regulation of ARF protein signal transduction (GO:0032012);; Biological Process: positive regulation of GTPase activity (GO:0043547);;	--	--	PH domain	Protein transport protein sec73 OS=Schizosaccharomyces pombe (strain 972 / ATCC 24843) OX=284812 GN=sec73 PE=3 SV=2	S	Function unknown	hypothetical protein HIM_04824 [Hirsutella minnesotensis 3608]
OCS_02232	--	--	--	--	--	PT repeat;; Essential protein Yae1, N terminal	--	--	--	hypothetical protein OCS_02232 [Ophiocordyceps sinensis CO18]
Ophiocordyceps_sinensis_newGene_3527	--	--	Cellular Component: chromosome, telomeric region (GO:0000781);; Biological Process: chromatin organization (GO:0006325);; Biological Process: regulation of transcription, DNA-templated (GO:0006355);; Molecular Function: acetyltransferase activity (GO:0016407);; Cellular Component: macromolecular complex (GO:0032991);; Cellular Component: nuclear chromosome part (GO:0044454);;	--	--	MOZ/SAS family	Histone acetyltransferase SAS2 OS=Saccharomyces cerevisiae (strain ATCC 204508 / S288c) OX=559292 GN=SAS2 PE=1 SV=1	B	Chromatin structure and dynamics	Histone acetyltransferase [Tolypocladium paradoxum]
OCS_02963	[R]	General function prediction only	Molecular Function: kinase activity (GO:0016301);; Biological Process: phosphorylation (GO:0016310);;	--	--	WD domain, G-beta repeat	--	S	Function unknown	WD domain containing protein [Ophiocordyceps sinensis CO18]
OCS_04471	--	--	Molecular Function: transcription factor activity, sequence-specific DNA binding (GO:0003700);; Biological Process: regulation of transcription, DNA-templated (GO:0006355);; Molecular Function: zinc ion binding (GO:0008270);; Molecular Function: sequence-specific DNA binding (GO:0043565);;	--	--	GATA zinc finger	Biofilm regulator 1 OS=Candida albicans (strain SC5314 / ATCC MYA-2876) OX=237561 GN=BRG1 PE=1 SV=2	S	Function unknown	transcription factor rfeH-Penicillium chrysogenum [Ophiocordyceps sinensis CO18]
Ophiocordyceps_sinensis_newGene_987	[T]	Signal transduction mechanisms	Molecular Function: ubiquitin-protein transferase activity (GO:0004842);; Cellular Component: anaphase-promoting complex (GO:0005680);; Biological Process: protein ubiquitination (GO:0016567);; Molecular Function: cyclin binding (GO:0030332);; Biological Process: anaphase-promoting complex-dependent catabolic process (GO:0031145);; Cellular Component: mitotic spindle pole body (GO:0044732);; Biol…	K03355|0|fpu:FPSE_11886|K03355 anaphase-promoting complex subunit 8 | (RefSeq) hypothetical protein	Cell cycle - yeast (ko04111);; Meiosis - yeast (ko04113);; Ubiquitin mediated proteolysis (ko04120)	Tetratricopeptide repeat;; Tetratricopeptide repeat;; Tetratricopeptide repeat;; Tetratricopeptide repeat;; Tetratricopeptide repeat;; TPR repeat;; Anaphase promoting complex subunit 8 / Cdc23;; Anaphase promoting complex subunit 8 / Cdc23	Anaphase-promoting complex subunit 8 OS=Schizosaccharomyces pombe (strain 972 / ATCC 24843) OX=284812 GN=cut23 PE=1 SV=2	D	Cell cycle control, cell division, chromosome partitioning	Anaphase-promoting complex subunit 8 [Tolypocladium ophioglossoides CBS 100239]
OCS_06288	--	--	Cellular Component: integral component of membrane (GO:0016021);;	--	--	--	Efflux pump DEP3 OS=Fusarium langsethiae OX=179993 GN=DEP3 PE=2 SV=1	G	Carbohydrate transport and metabolism	MFS drug efflux transporter [Ophiocordyceps sinensis CO18]
OCS_05368	--	--	Cellular Component: membrane (GO:0016020);;	--	--	--	--	S	Function unknown	hypothetical protein OCS_05368 [Ophiocordyceps sinensis CO18]
OCS_06685	[P]	Inorganic ion transport and metabolism	--	--	--	--	Uncharacterized protein YGR266W OS=Saccharomyces cerevisiae (strain ATCC 204508 / S288c) OX=559292 GN=YGR266W PE=1 SV=1	S	Function unknown	Alkaline phosphatase D-related protein [Ophiocordyceps sinensis CO18]
Ophiocordyceps_sinensis_newGene_3027	--	--	--	--	--	--	--	--	--	hypothetical protein HIM_10166 [Hirsutella minnesotensis 3608]
OCS_02486	[S]	Function unknown	--	--	--	Prokaryotic phospholipase A2	Uncharacterized secreted protein ARB_02001 OS=Arthroderma benhamiae (strain ATCC MYA-4681 / CBS 112371) OX=663331 GN=ARB_02001 PE=1 SV=1	S	Function unknown	p15-like protein [Ophiocordyceps sinensis CO18]
OCS_03669	[P]	Inorganic ion transport and metabolism	Molecular Function: N,N-dimethylaniline monooxygenase activity (GO:0004499);; Cellular Component: mitochondrion (GO:0005739);; Cellular Component: endoplasmic reticulum membrane (GO:0005789);; Biological Process: protein folding (GO:0006457);; Molecular Function: flavin adenine dinucleotide binding (GO:0050660);; Molecular Function: NADP binding (GO:0050661);; Biological Process: oxidation-reduct…	--	--	Flavin-binding monooxygenase-like;; Pyridine nucleotide-disulphide oxidoreductase;; Pyridine nucleotide-disulphide oxidoreductase;; L-lysine 6-monooxygenase (NADPH-requiring);; FAD-NAD(P)-binding;; NAD(P)-binding Rossmann-like domain;; Thi4 family	Thiol-specific monooxygenase OS=Schizosaccharomyces pombe (strain 972 / ATCC 24843) OX=284812 GN=fmo1 PE=1 SV=1	P	Inorganic ion transport and metabolism	thiol-specific monooxygenase [Ophiocordyceps sinensis CO18]
OCS_04272	--	--	--	--	--	--	--	--	--	hypothetical protein OCS_04272 [Ophiocordyceps sinensis CO18]
OCS_04534	[P]	Inorganic ion transport and metabolism	Cellular Component: integral component of membrane (GO:0016021);; Molecular Function: cation-transporting ATPase activity (GO:0019829);; Biological Process: metal ion transport (GO:0030001);; Molecular Function: metal ion binding (GO:0046872);; Biological Process: cation transmembrane transport (GO:0098655);;	K01533|5.80867e-76|pcs:Pc06g02280|K01533 Cu2+-exporting ATPase [EC:3.6.3.4] | (RefSeq) Pc06g02280	--	--	P-type cation-transporting ATPase OS=Saccharomyces cerevisiae (strain ATCC 204508 / S288c) OX=559292 GN=PCA1 PE=1 SV=2	P	Inorganic ion transport and metabolism	copper transporting P-type ATPase protein [Ophiocordyceps sinensis CO18]
OCS_01527	[O]	Posttranslational modification, protein turnover, chaperones	Cellular Component: chromosome, telomeric region (GO:0000781);; Biological Process: chromatin silencing at telomere (GO:0006348);; Biological Process: chromatin silencing at silent mating-type cassette (GO:0030466);; Molecular Function: histone deacetylase activity (H3-K14 specific) (GO:0031078);; Cellular Component: nuclear pericentric heterochromatin (GO:0031618);; Cellular Component: mating-ty…	K11121|0|nhe:NECHADRAFT_33808|K11121 NAD-dependent histone deacetylase SIR2 [EC:3.5.1.-] | (RefSeq) SRT2107; hypothetical protein	Nicotinate and nicotinamide metabolism (ko00760)	Sir2 family	NAD-dependent protein deacetylase hst1 OS=Emericella nidulans (strain FGSC A4 / ATCC 38163 / CBS 112.46 / NRRL 194 / M139) OX=227321 GN=AN10449 PE=3 SV=1	K	Transcription	NAD-dependent histone deacetylase [Ophiocordyceps sinensis CO18]
OCS_04779	--	--	Cellular Component: integral component of membrane (GO:0016021);;	--	--	--	--	S	Function unknown	hypothetical protein OCS_04779 [Ophiocordyceps sinensis CO18]
OCS_02199	--	--	--	--	--	BTB/POZ domain	--	S	Function unknown	speckle-type POZ protein-like protein [Ophiocordyceps sinensis CO18]
Ophiocordyceps_sinensis_newGene_1638	--	--	Biological Process: mitotic cytokinesis (GO:0000281);; Cellular Component: actin filament (GO:0005884);; Cellular Component: F-actin capping protein complex (GO:0008290);; Biological Process: regulation of cell shape (GO:0008360);; Cellular Component: actin cortical patch (GO:0030479);; Cellular Component: cell division site (GO:0032153);; Biological Process: cellular protein localization (GO:003…	K10364|1.6607e-158|nhe:NECHADRAFT_99630|K10364 capping protein (actin filament) muscle Z-line, alpha | (RefSeq) hypothetical protein	Endocytosis (ko04144)	F-actin capping protein alpha subunit	F-actin-capping protein subunit alpha OS=Neurospora crassa (strain ATCC 24698 / 74-OR23-1A / CBS 708.71 / DSM 1257 / FGSC 987) OX=367110 GN=fac-1 PE=3 SV=3	O	Posttranslational modification, protein turnover, chaperones	F-actin-capping protein subunit alpha [Hirsutella minnesotensis 3608]
OCS_03969	[V]	Defense mechanisms	Biological Process: drug transmembrane transport (GO:0006855);; Molecular Function: drug transmembrane transporter activity (GO:0015238);; Molecular Function: antiporter activity (GO:0015297);; Cellular Component: integral component of membrane (GO:0016021);;	K03327|0|maw:MAC_00738|K03327 multidrug resistance protein, MATE family | (RefSeq) MATE efflux family protein subfamily, putative	--	MatE	Uncharacterized transporter YDR338C OS=Saccharomyces cerevisiae (strain ATCC 204508 / S288c) OX=559292 GN=YDR338C PE=1 SV=1	V	Defense mechanisms	Multi antimicrobial extrusion protein [Ophiocordyceps sinensis CO18]
Ophiocordyceps_sinensis_newGene_4047	--	--	--	--	--	--	--	--	--	hypothetical protein OCS_06059 [Ophiocordyceps sinensis CO18]
Ophiocordyceps_sinensis_newGene_1960	[X]	Mobilome: prophages, transposons	Cellular Component: mitochondrial inner membrane (GO:0005743);; Molecular Function: NADH dehydrogenase (ubiquinone) activity (GO:0008137);; Cellular Component: integral component of membrane (GO:0016021);; Biological Process: ATP synthesis coupled electron transport (GO:0042773);;	K03883|3.52607e-109|fgr:GizefMp08|K03883 NADH-ubiquinone oxidoreductase chain 5 [EC:1.6.5.3] | (RefSeq) nad5; NADH:ubiquinone oxidoreductase subunit 5	Oxidative phosphorylation (ko00190)	Reverse transcriptase (RNA-dependent DNA polymerase);; Type II intron maturase;; LAGLIDADG endonuclease;; Proton-conducting membrane transporter	NADH-ubiquinone oxidoreductase chain 5 OS=Hypocrea jecorina OX=51453 GN=nd5 PE=3 SV=1	C	Energy production and conversion	hypothetical protein (mitochondrion) [Ophiocordyceps sinensis]
OCS_05793	--	--	--	--	--	Protein of unknown function (DUF3807)	--	S	Function unknown	hypothetical protein OCS_05793 [Ophiocordyceps sinensis CO18]
Ophiocordyceps_sinensis_newGene_175	[T]	Signal transduction mechanisms	Molecular Function: nucleotide binding (GO:0000166);; Molecular Function: protein kinase activity (GO:0004672);; Biological Process: phosphorylation (GO:0016310);; Molecular Function: ion binding (GO:0043167);; Biological Process: primary metabolic process (GO:0044238);; Biological Process: cellular macromolecule metabolic process (GO:0044260);;	--	--	Protein kinase domain;; Protein tyrosine kinase	Spindle assembly checkpoint kinase OS=Kluyveromyces lactis (strain ATCC 8585 / CBS 2359 / DSM 70799 / NBRC 1267 / NRRL Y-1140 / WM37) OX=284590 GN=IPL1 PE=3 SV=1	T	Signal transduction mechanisms	kinase-like protein [Cenococcum geophilum 1.58]
Ophiocordyceps_sinensis_newGene_1915	--	--	Cellular Component: integral component of membrane (GO:0016021);;	--	--	--	--	S	Function unknown	hypothetical protein HIM_05684 [Hirsutella minnesotensis 3608]
OCS_02990	--	--	Molecular Function: adenyl-nucleotide exchange factor activity (GO:0000774);; Biological Process: cytoplasmic translation (GO:0002181);; Cellular Component: nucleus (GO:0005634);; Cellular Component: cytosolic ribosome (GO:0022626);; Biological Process: regulation of catalytic activity (GO:0050790);; Biological Process: ubiquitin-dependent catabolism of misfolded proteins by cytoplasm-associated …	--	--	Nucleotide exchange factor Fes1	Hsp70 nucleotide exchange factor FES1 OS=Gibberella zeae (strain PH-1 / ATCC MYA-4620 / FGSC 9075 / NRRL 31084) OX=229533 GN=FES1 PE=3 SV=1	K	Transcription	Nucleotide exchange factor Fes1 [Ophiocordyceps sinensis CO18]
OCS_03339	--	--	--	--	--	--	--	--	--	hypothetical protein OCS_03339 [Ophiocordyceps sinensis CO18]
Ophiocordyceps_sinensis_newGene_3533	--	--	--	--	--	--	--	--	--	polyprotein [Ophiocordyceps sinensis CO18]
OCS_00901	--	--	--	--	--	--	--	--	--	hypothetical protein OCS_00901 [Ophiocordyceps sinensis CO18]
Ophiocordyceps_sinensis_newGene_3321	--	--	--	--	--	--	--	S	Function unknown	hypothetical protein TOPH_09159, partial [Tolypocladium ophioglossoides CBS 100239]
Ophiocordyceps_sinensis_newGene_1088	[I]	Lipid transport and metabolism	Molecular Function: acetyl-CoA C-acetyltransferase activity (GO:0003985);; Cellular Component: cytoplasm (GO:0005737);; Biological Process: metabolic process (GO:0008152);;	K00626|2.28988e-12|cthr:CTHT_0054890|K00626 acetyl-CoA C-acetyltransferase [EC:2.3.1.9] | (RefSeq) acetyl-CoA acetyltransferase-like protein	Fatty acid degradation (ko00071);; Synthesis and degradation of ketone bodies (ko00072);; Valine, leucine and isoleucine degradation (ko00280);; Lysine degradation (ko00310);; Tryptophan metabolism (ko00380);; Pyruvate metabolism (ko00620);; Glyoxylate and dicarboxylate metabolism (ko00630);; Propanoate metabolism (ko00640);; Butanoate metabolism (ko00650);; Terpenoid backbone biosynthesis (ko009…	Thiolase, N-terminal domain	Acetyl-CoA acetyltransferase IA OS=Candida tropicalis OX=5482 GN=PACTA PE=1 SV=3	I	Lipid transport and metabolism	putative acetyl- acetyltransferase [Rosellinia necatrix]
Ophiocordyceps_sinensis_newGene_1411	--	--	Molecular Function: nucleic acid binding (GO:0003676);; Molecular Function: helicase activity (GO:0004386);; Molecular Function: ATP binding (GO:0005524);; Cellular Component: nucleus (GO:0005634);;	K12858|3.15615e-64|maw:MAC_01015|K12858 ATP-dependent RNA helicase DDX23/PRP28 [EC:3.6.4.13] | (RefSeq) pre-mRNA-splicing ATP-dependent RNA helicase PRP28	Spliceosome (ko03040)	--	Pre-mRNA-splicing ATP-dependent RNA helicase PRP28 OS=Gibberella zeae (strain PH-1 / ATCC MYA-4620 / FGSC 9075 / NRRL 31084) OX=229533 GN=PRP28 PE=3 SV=1	A	RNA processing and modification	Pre-mRNA-splicing ATP-dependent RNA helicase PRP28 [Tolypocladium paradoxum]
OCS_03652	--	--	Molecular Function: FMN binding (GO:0010181);; Cellular Component: integral component of membrane (GO:0016021);; Molecular Function: oxidoreductase activity (GO:0016491);; Biological Process: oxidation-reduction process (GO:0055114);;	--	--	Protein of unknown function (DUF2470)	--	S	Function unknown	hypothetical protein OCS_03652 [Ophiocordyceps sinensis CO18]
OCS_04561	--	--	Cellular Component: nuclear chromatin (GO:0000790);; Biological Process: DNA-templated transcription, termination (GO:0006353);; Biological Process: negative regulation of transcription, DNA-templated (GO:0045892);;	K13119|7.28534e-139|nhe:NECHADRAFT_100827|K13119 protein FAM50 | (RefSeq) hypothetical protein	--	XAP5, circadian clock regulator	FAM50 family protein C1020.12c OS=Schizosaccharomyces pombe (strain 972 / ATCC 24843) OX=284812 GN=xap5 PE=3 SV=2	S	Function unknown	XAP5 domain containing protein [Ophiocordyceps sinensis CO18]
Ophiocordyceps_sinensis_newGene_2743	[CE]	Energy production and conversion;; Amino acid transport and metabolism	Molecular Function: magnesium ion binding (GO:0000287);; Molecular Function: 3-isopropylmalate dehydrogenase activity (GO:0003862);; Cellular Component: cytosol (GO:0005829);; Biological Process: leucine biosynthetic process (GO:0009098);; Molecular Function: NAD binding (GO:0051287);; Biological Process: oxidation-reduction process (GO:0055114);;	K00052|4.48095e-27|cmt:CCM_02117|K00052 3-isopropylmalate dehydrogenase [EC:1.1.1.85] | (RefSeq) 3-isopropylmalate dehydrogenase	Valine, leucine and isoleucine biosynthesis (ko00290);; C5-Branched dibasic acid metabolism (ko00660);; 2-Oxocarboxylic acid metabolism (ko01210);; Biosynthesis of amino acids (ko01230)	Isocitrate/isopropylmalate dehydrogenase	3-isopropylmalate dehydrogenase OS=Neurospora crassa (strain ATCC 24698 / 74-OR23-1A / CBS 708.71 / DSM 1257 / FGSC 987) OX=367110 GN=leu-1 PE=3 SV=2	E	Amino acid transport and metabolism	3-isopropylmalate dehydrogenase [Tolypocladium ophioglossoides CBS 100239]
OCS_02140	--	--	--	--	--	--	--	S	Function unknown	hypothetical protein OCS_02140 [Ophiocordyceps sinensis CO18]
OCS_02380	--	--	Cellular Component: integral component of membrane (GO:0016021);;	--	--	--	--	--	--	hypothetical protein OCS_02380 [Ophiocordyceps sinensis CO18]
OCS_02279	[P]	Inorganic ion transport and metabolism	Molecular Function: calcium-transporting ATPase activity (GO:0005388);; Molecular Function: ATP binding (GO:0005524);; Cellular Component: integral component of membrane (GO:0016021);; Cellular Component: sarcoplasmic reticulum membrane (GO:0033017);; Molecular Function: metal ion binding (GO:0046872);; Biological Process: calcium ion transmembrane transport (GO:0070588);;	K05853|0|maj:MAA_07280|K05853 Ca2+ transporting ATPase, sarcoplasmic/endoplasmic reticulum [EC:3.6.3.8] | (RefSeq) calcium-transporting ATPase	--	E1-E2 ATPase;; Cation transporting ATPase, C-terminus;; haloacid dehalogenase-like hydrolase;; Cation transporter/ATPase, N-terminus;; Cation transport ATPase (P-type);; haloacid dehalogenase-like hydrolase	Calcium-transporting ATPase 1 OS=Schizosaccharomyces pombe (strain 972 / ATCC 24843) OX=284812 GN=pmr1 PE=1 SV=1	P	Inorganic ion transport and metabolism	ATPase, P-type, calcium-transporting [Ophiocordyceps sinensis CO18]
OCS_01499	--	--	--	--	--	--	--	S	Function unknown	hypothetical protein OCS_01499 [Ophiocordyceps sinensis CO18]
OCS_04986	[M]	Cell wall/membrane/envelope biogenesis	Biological Process: cellular amino acid metabolic process (GO:0006520);; Molecular Function: racemase activity, acting on amino acids and derivatives (GO:0036361);;	--	--	Asp/Glu/Hydantoin racemase	--	E	Amino acid transport and metabolism	aspartate racemase [Ophiocordyceps sinensis CO18]
OCS_01886	--	--	--	--	--	--	LysM domain-containing protein ARB_05157 OS=Arthroderma benhamiae (strain ATCC MYA-4681 / CBS 112371) OX=663331 GN=ARB_05157 PE=1 SV=1	S	Function unknown	LysM domain-containing protein [Ophiocordyceps sinensis CO18]
OCS_06796	--	--	--	--	--	--	--	S	Function unknown	hypothetical protein OCS_06796 [Ophiocordyceps sinensis CO18]
OCS_00875	--	--	--	--	--	--	--	S	Function unknown	hypothetical protein OCS_00875 [Ophiocordyceps sinensis CO18]
OCS_01317	--	--	--	--	--	--	--	L	Replication, recombination and repair	hypothetical protein OCS_01317 [Ophiocordyceps sinensis CO18]
OCS_05359	--	--	--	--	--	Putative amidoligase enzyme	--	S	Function unknown	hypothetical protein OCS_05359 [Ophiocordyceps sinensis CO18]
OCS_05971	--	--	--	--	--	Mob1/phocein family	Maintenance of ploidy protein mob2 OS=Schizosaccharomyces pombe (strain 972 / ATCC 24843) OX=284812 GN=mob2 PE=1 SV=1	S	Function unknown	Mob1/phocein [Ophiocordyceps sinensis CO18]
Ophiocordyceps_sinensis_newGene_856	--	--	Cellular Component: integral component of membrane (GO:0016021);;	--	--	--	--	--	--	hypothetical protein OCS_05776 [Ophiocordyceps sinensis CO18]
OCS_05401	[J]	Translation, ribosomal structure and biogenesis	Molecular Function: serine-tRNA ligase activity (GO:0004828);; Molecular Function: ATP binding (GO:0005524);; Cellular Component: cytoplasm (GO:0005737);; Biological Process: seryl-tRNA aminoacylation (GO:0006434);;	--	--	Seryl-tRNA synthetase N-terminal domain	--	Z	Cytoskeleton	Actin-like protein [Ophiocordyceps sinensis CO18]
Ophiocordyceps_sinensis_newGene_742	--	--	Biological Process: cellular process (GO:0009987);;	--	--	CVNH domain	--	--	--	hypothetical protein TRIVIDRAFT_183048 [Trichoderma virens Gv29-8]
OCS_04505	[L]	Replication, recombination and repair	Molecular Function: nucleic acid binding (GO:0003676);; Molecular Function: ATP binding (GO:0005524);; Biological Process: DNA recombination (GO:0006310);; Molecular Function: ATP-dependent helicase activity (GO:0008026);;	--	--	DEAD/DEAH box helicase;; Helicase conserved C-terminal domain;; RecQ zinc-binding	ATP-dependent DNA helicase hus2/rqh1 OS=Schizosaccharomyces pombe (strain 972 / ATCC 24843) OX=284812 GN=rqh1 PE=1 SV=1	L	Replication, recombination and repair	ATP-dependent DNA helicase recQ [Ophiocordyceps sinensis CO18]
OCS_04485	[L]	Replication, recombination and repair	Biological Process: recombinational repair (GO:0000725);; Molecular Function: DNA binding (GO:0003677);; Molecular Function: ATP-dependent DNA helicase activity (GO:0004003);; Molecular Function: ATP binding (GO:0005524);; Cellular Component: nucleus (GO:0005634);; Biological Process: postreplication repair (GO:0006301);; Biological Process: DNA duplex unwinding (GO:0032508);; Biological Process:…	K03657|0|maw:MAC_03490|K03657 DNA helicase II / ATP-dependent DNA helicase PcrA [EC:3.6.4.12] | (RefSeq) putative ATP-dependent DNA helicase	Nucleotide excision repair (ko03420);; Mismatch repair (ko03430)	UvrD/REP helicase N-terminal domain;; UvrD-like helicase C-terminal domain;; AAA domain;; UvrD-like helicase C-terminal domain;; AAA domain	ATP-dependent DNA helicase srs2 OS=Schizosaccharomyces pombe (strain 972 / ATCC 24843) OX=284812 GN=srs2 PE=1 SV=1	L	Replication, recombination and repair	DNA helicase, UvrD/REP type [Ophiocordyceps sinensis CO18]
OCS_06263	--	--	--	--	--	--	--	S	Function unknown	Terpenoid synthase [Ophiocordyceps sinensis CO18]
OCS_01682	--	--	Cellular Component: integral component of membrane (GO:0016021);; Molecular Function: hydrolase activity (GO:0016787);;	--	--	--	--	S	Function unknown	alpha beta hydrolase fold family [Ophiocordyceps sinensis CO18]
Ophiocordyceps_sinensis_newGene_2671	[T]	Signal transduction mechanisms	Molecular Function: kinase activity (GO:0016301);;	--	--	Protein kinase domain;; Protein tyrosine kinase;; Phosphotransferase enzyme family;; Kinase-like	Serine/threonine-protein kinase cds1 OS=Schizosaccharomyces pombe (strain 972 / ATCC 24843) OX=284812 GN=cds1 PE=1 SV=2	T	Signal transduction mechanisms	kinase-like protein [Ophiocordyceps sinensis CO18]
OCS_06207	--	--	Cellular Component: integral component of membrane (GO:0016021);;	--	--	--	--	S	Function unknown	hypothetical protein OCS_06207 [Ophiocordyceps sinensis CO18]
Ophiocordyceps_sinensis_newGene_840	--	--	--	--	--	--	--	--	--	hypothetical protein HIM_01489 [Hirsutella minnesotensis 3608]
OCS_02331	[R]	General function prediction only	Biological Process: maturation of SSU-rRNA from tricistronic rRNA transcript (SSU-rRNA, 5.8S rRNA, LSU-rRNA) (GO:0000462);; Cellular Component: cytosol (GO:0005829);; Cellular Component: viral nucleocapsid (GO:0019013);; Molecular Function: snoRNA binding (GO:0030515);; Cellular Component: 90S preribosome (GO:0030686);; Cellular Component: small-subunit processome (GO:0032040);; Cellular Componen…	K14549|0|maw:MAC_03899|K14549 U3 small nucleolar RNA-associated protein 15 | (RefSeq) small nucleolar ribonucleoprotein complex subunit Utp15, putative	Ribosome biogenesis in eukaryotes (ko03008)	WD domain, G-beta repeat;; Anaphase-promoting complex subunit 4 WD40 domain	U3 small nucleolar RNA-associated protein 15 OS=Schizosaccharomyces pombe (strain 972 / ATCC 24843) OX=284812 GN=utp15 PE=3 SV=1	S	Function unknown	WD40 repeat-like-containing domain protein [Ophiocordyceps sinensis CO18]
OCS_01681	--	--	Cellular Component: integral component of membrane (GO:0016021);; Molecular Function: kinase activity (GO:0016301);; Biological Process: phosphorylation (GO:0016310);; Molecular Function: hydrolase activity (GO:0016787);;	--	--	--	--	S	Function unknown	alpha beta hydrolase fold family [Ophiocordyceps sinensis CO18]
OCS_04216	--	--	Molecular Function: metal ion binding (GO:0046872);;	--	--	--	--	--	--	zinc finger domain-containing protein [Ophiocordyceps sinensis CO18]
Ophiocordyceps_sinensis_newGene_1350	--	--	--	--	--	--	--	S	Function unknown	Hsp70 family chaperone [Cordyceps militaris]
Ophiocordyceps_sinensis_newGene_4065	--	--	--	--	--	--	--	--	--	hypothetical protein OCS_06149 [Ophiocordyceps sinensis CO18]
Ophiocordyceps_sinensis_newGene_1842	--	--	Molecular Function: oxidoreductase activity (GO:0016491);; Biological Process: polyketide biosynthetic process (GO:0030639);; Molecular Function: NADPH binding (GO:0070402);;	--	--	--	Enoyl reductase LovC OS=Aspergillus terreus OX=33178 GN=lovC PE=1 SV=1	C	Energy production and conversion	hypothetical protein ANO14919_109960 [fungal sp. No.14919]
OCS_04844	[O]	Posttranslational modification, protein turnover, chaperones	Cellular Component: cell (GO:0005623);; Biological Process: glycerol ether metabolic process (GO:0006662);; Molecular Function: protein disulfide oxidoreductase activity (GO:0015035);; Biological Process: cell redox homeostasis (GO:0045454);; Biological Process: oxidation-reduction process (GO:0055114);;	K03671|9.70419e-62|maj:MAA_05201|K03671 thioredoxin 1 | (RefSeq) hypothetical protein	--	Thioredoxin;; Thioredoxin-like domain	Thioredoxin-like protein OS=Fusarium culmorum OX=5516 PE=1 SV=1	O	Posttranslational modification, protein turnover, chaperones	Thioredoxin-like protein [Ophiocordyceps sinensis CO18]
OCS_05942	[QV]	Secondary metabolites biosynthesis, transport and catabolism;; Defense mechanisms	Molecular Function: monooxygenase activity (GO:0004497);; Molecular Function: iron ion binding (GO:0005506);; Cellular Component: membrane (GO:0016020);; Molecular Function: oxidoreductase activity, acting on paired donors, with incorporation or reduction of molecular oxygen (GO:0016705);; Molecular Function: heme binding (GO:0020037);; Biological Process: oxidation-reduction process (GO:0055114)…	--	--	Cytochrome P450	Cytochrome P450 monooxygenase azaI OS=Aspergillus niger (strain ATCC 1015 / CBS 113.46 / FGSC A1144 / LSHB Ac4 / NCTC 3858a / NRRL 328 / USDA 3528.7) OX=380704 GN=azaI PE=2 SV=1	Q	Secondary metabolites biosynthesis, transport and catabolism	Cytochrome P450 [Ophiocordyceps sinensis CO18]
OCS_05386	--	--	Molecular Function: GTPase activator activity (GO:0005096);; Cellular Component: nucleus (GO:0005634);; Cellular Component: cytosol (GO:0005829);; Cellular Component: cell division site (GO:0032153);; Biological Process: positive regulation of GTPase activity (GO:0043547);; Biological Process: regulation of small GTPase mediated signal transduction (GO:0051056);;	--	--	Domain of unknown function (DUF3384);; Rap/ran-GAP;; Tuberin	Tuberous sclerosis 2 protein homolog OS=Schizosaccharomyces pombe (strain 972 / ATCC 24843) OX=284812 GN=tsc2 PE=1 SV=1	S	Function unknown	tuberin [Ophiocordyceps sinensis CO18]
OCS_04370	[S]	Function unknown	Molecular Function: hydrolase activity (GO:0016787);;	--	--	Pectate lyase superfamily protein;; Uncharacterised protein family (UPF0261)	Probable glucan endo-1,3-beta-glucosidase ARB_02077 OS=Arthroderma benhamiae (strain ATCC MYA-4681 / CBS 112371) OX=663331 GN=ARB_02077 PE=1 SV=1	G	Carbohydrate transport and metabolism	glycoside hydrolase family 55 [Ophiocordyceps sinensis CO18]
OCS_05241	[O]	Posttranslational modification, protein turnover, chaperones	Molecular Function: transferase activity (GO:0016740);;	K00799|5.20379e-131|maw:MAC_07906|K00799 glutathione S-transferase [EC:2.5.1.18] | (RefSeq) glutathione S-transferase II	Glutathione metabolism (ko00480)	Glutathione S-transferase, N-terminal domain;; Glutathione S-transferase, C-terminal domain;; Glutathione S-transferase, N-terminal domain;; Glutathione S-transferase, C-terminal domain;; Glutathione S-transferase, N-terminal domain;; Glutathione S-transferase, C-terminal domain	Glutathione S-transferase-like protein tpcF OS=Neosartorya fumigata (strain ATCC MYA-4609 / Af293 / CBS 101355 / FGSC A1100) OX=330879 GN=tpcF PE=2 SV=1	O	Posttranslational modification, protein turnover, chaperones	glutathione S-transferase II [Ophiocordyceps sinensis CO18]
Ophiocordyceps_sinensis_newGene_1913	--	--	--	--	--	--	--	--	--	hypothetical protein OCS_04972 [Ophiocordyceps sinensis CO18]
OCS_01578	--	--	--	--	--	--	--	S	Function unknown	hypothetical protein OCS_01578 [Ophiocordyceps sinensis CO18]
OCS_03020	--	--	--	--	--	--	--	S	Function unknown	hypothetical protein OCS_03020 [Ophiocordyceps sinensis CO18]
OCS_04608	--	--	--	--	--	--	--	--	--	hypothetical protein OCS_04608 [Ophiocordyceps sinensis CO18]
OCS_04094	--	--	--	--	--	--	--	S	Function unknown	hypothetical protein OCS_04094 [Ophiocordyceps sinensis CO18]
OCS_04276	--	--	--	--	--	--	--	S	Function unknown	hypothetical protein OCS_04276 [Ophiocordyceps sinensis CO18]
OCS_03478	--	--	--	--	--	--	Gamma-glutamyl cyclotransferase gliK OS=Neosartorya fumigata (strain ATCC MYA-4609 / Af293 / CBS 101355 / FGSC A1100) OX=330879 GN=gliK PE=3 SV=1	S	Function unknown	gliotoxin biosynthesis protein GliK [Ophiocordyceps sinensis CO18]
OCS_03718	--	--	Molecular Function: protein serine/threonine kinase activity (GO:0004674);; Molecular Function: ATP binding (GO:0005524);; Biological Process: protein phosphorylation (GO:0006468);; Molecular Function: phosphopantetheine binding (GO:0031177);;	--	--	Protein kinase domain;; Protein tyrosine kinase	Protein kinase dsk1 OS=Schizosaccharomyces pombe (strain 972 / ATCC 24843) OX=284812 GN=dsk1 PE=3 SV=2	T	Signal transduction mechanisms	serine/threonine protein kinase [Ophiocordyceps sinensis CO18]
Ophiocordyceps_sinensis_newGene_4032	--	--	Cellular Component: membrane (GO:0016020);; Molecular Function: peptidase activity, acting on L-amino acid peptides (GO:0070011);;	K01282|1.72981e-35|tre:TRIREDRAFT_66608|K01282 dipeptidyl aminopeptidase [EC:3.4.14.-] | (RefSeq) hypothetical protein	--	--	Probable dipeptidyl-aminopeptidase B OS=Metarhizium robertsii (strain ARSEF 23 / ATCC MYA-3075) OX=655844 GN=DAPB PE=3 SV=2	E	Amino acid transport and metabolism	putative dipeptidyl-aminopeptidase B [Tolypocladium ophioglossoides CBS 100239]
OCS_04690	--	--	Cellular Component: plasma membrane (GO:0005886);; Biological Process: carbohydrate metabolic process (GO:0005975);; Molecular Function: transferase activity (GO:0016740);; Cellular Component: anchored component of membrane (GO:0031225);;	--	--	Glucanosyltransferase	1,3-beta-glucanosyltransferase gas2 OS=Schizosaccharomyces pombe (strain 972 / ATCC 24843) OX=284812 GN=gas2 PE=2 SV=1	S	Function unknown	Glycolipid anchored surface protein GAS1 [Ophiocordyceps sinensis CO18]
Ophiocordyceps_sinensis_newGene_1861	--	--	Molecular Function: RNA polymerase II transcription factor activity, sequence-specific DNA binding (GO:0000981);; Cellular Component: nucleus (GO:0005634);; Biological Process: regulation of transcription from RNA polymerase II promoter (GO:0006357);; Molecular Function: zinc ion binding (GO:0008270);;	--	--	Fungal Zn(2)-Cys(6) binuclear cluster domain	--	S	Function unknown	hypothetical protein CDD83_1393 [Cordyceps sp. RAO-2017]
OCS_01535	--	--	Biological Process: telomere maintenance (GO:0000723);; Molecular Function: DNA helicase activity (GO:0003678);; Molecular Function: ATP binding (GO:0005524);; Biological Process: DNA repair (GO:0006281);; Biological Process: DNA recombination (GO:0006310);; Biological Process: DNA duplex unwinding (GO:0032508);;	--	--	--	--	L	Replication, recombination and repair	hypothetical protein OCS_01535 [Ophiocordyceps sinensis CO18]
OCS_03491	[Q]	Secondary metabolites biosynthesis, transport and catabolism	Molecular Function: iron ion binding (GO:0005506);; Molecular Function: oxidoreductase activity (GO:0016491);; Biological Process: oxidation-reduction process (GO:0055114);;	--	--	non-haem dioxygenase in morphine synthesis N-terminal;; 2OG-Fe(II) oxygenase superfamily;; Eukaryotic-type carbonic anhydrase	2-oxoglutarate-Fe(II) type oxidoreductase hxnY OS=Emericella nidulans (strain FGSC A4 / ATCC 38163 / CBS 112.46 / NRRL 194 / M139) OX=227321 GN=hxnY PE=2 SV=1	S	Function unknown	1-aminocyclopropane-1-carboxylate oxidase [Ophiocordyceps sinensis CO18]
Ophiocordyceps_sinensis_newGene_2638	--	--	Cellular Component: membrane (GO:0016020);;	--	--	--	--	S	Function unknown	hypothetical protein CDD83_8926 [Cordyceps sp. RAO-2017]
OCS_01670	[H]	Coenzyme transport and metabolism	Molecular Function: catalytic activity (GO:0003824);;	K01598|5.45035e-79|maj:MAA_08067|K01598 phosphopantothenoylcysteine decarboxylase [EC:4.1.1.36] | (RefSeq) hypothetical protein	Pantothenate and CoA biosynthesis (ko00770)	Flavoprotein	Probable thymidylate synthase OS=Schizosaccharomyces pombe (strain 972 / ATCC 24843) OX=284812 GN=SPAC15E1.04 PE=3 SV=1	H	Coenzyme transport and metabolism	Flavoprotein [Ophiocordyceps sinensis CO18]
OCS_06295	[M]	Cell wall/membrane/envelope biogenesis	Molecular Function: hydrolase activity, acting on ester bonds (GO:0016788);;	K01114|0|maj:MAA_00996|K01114 phospholipase C [EC:3.1.4.3] | (RefSeq) Phosphoesterase	Inositol phosphate metabolism (ko00562);; Glycerophospholipid metabolism (ko00564);; Ether lipid metabolism (ko00565)	Phosphoesterase family	--	M	Cell wall/membrane/envelope biogenesis	Phosphoesterase [Ophiocordyceps sinensis CO18]
OCS_00668	[JR]	Translation, ribosomal structure and biogenesis;; General function prediction only	--	K06035|6.8731e-103|maj:MAA_00337|K06035 cyanamide hydratase [EC:4.2.1.69] | (RefSeq) Cyanamide hydratase, HD-type	Atrazine degradation (ko00791)	HD domain	Cyanamide hydratase OS=Myrothecium verrucaria OX=1859699 GN=CAH PE=1 SV=1	S	Function unknown	Cyanamide hydratase, HD-type [Ophiocordyceps sinensis CO18]
OCS_00844	[G]	Carbohydrate transport and metabolism	Molecular Function: hydrolase activity, hydrolyzing O-glycosyl compounds (GO:0004553);; Biological Process: carbohydrate metabolic process (GO:0005975);; Cellular Component: integral component of membrane (GO:0016021);;	--	--	Glycosyl hydrolases family 16	--	G	Carbohydrate transport and metabolism	gram-negative bacteria-binding protein 1 precursor [Ophiocordyceps sinensis CO18]
OCS_02277	--	--	--	K15627|0|maw:MAC_00530|K15627 tether containing UBX domain for GLUT4 | (RefSeq) UBX domain protein, putative	--	TUG ubiquitin-like domain	--	S	Function unknown	GLUT4 regulating protein TUG [Ophiocordyceps sinensis CO18]
Ophiocordyceps_sinensis_newGene_1103	[E]	Amino acid transport and metabolism	Molecular Function: glutamate decarboxylase activity (GO:0004351);; Biological Process: glutamate metabolic process (GO:0006536);; Molecular Function: pyridoxal phosphate binding (GO:0030170);;	K01580|6.25144e-134|abe:ARB_01496|K01580 glutamate decarboxylase [EC:4.1.1.15] | (RefSeq) glutamate decarboxylase	Alanine, aspartate and glutamate metabolism (ko00250);; beta-Alanine metabolism (ko00410);; Taurine and hypotaurine metabolism (ko00430);; Butanoate metabolism (ko00650)	Pyridoxal-dependent decarboxylase conserved domain;; Pyridoxal-dependent decarboxylase conserved domain	Glutamate decarboxylase OS=Saccharomyces cerevisiae (strain ATCC 204508 / S288c) OX=559292 GN=GAD1 PE=1 SV=1	E	Amino acid transport and metabolism	hypothetical protein HIM_12346 [Hirsutella minnesotensis 3608]
Ophiocordyceps_sinensis_newGene_4577	--	--	--	--	--	--	--	S	Function unknown	hypothetical protein HIM_01766 [Hirsutella minnesotensis 3608]
Ophiocordyceps_sinensis_newGene_798	[R]	General function prediction only	--	--	--	--	--	S	Function unknown	hypothetical protein CDD83_8560 [Cordyceps sp. RAO-2017]
Ophiocordyceps_sinensis_newGene_2980	[J]	Translation, ribosomal structure and biogenesis	Molecular Function: translation initiation factor activity (GO:0003743);; Molecular Function: guanyl-nucleotide exchange factor activity (GO:0005085);; Cellular Component: mitochondrion (GO:0005739);; Cellular Component: cytosol (GO:0005829);; Cellular Component: eukaryotic translation initiation factor 2B complex (GO:0005851);; Biological Process: regulation of translational initiation (GO:00064…	K03754|0|maw:MAC_09242|K03754 translation initiation factor eIF-2B subunit beta | (RefSeq) translation regulator GCD7	RNA transport (ko03013)	Initiation factor 2 subunit family	Probable translation initiation factor eIF-2B subunit beta OS=Schizosaccharomyces pombe (strain 972 / ATCC 24843) OX=284812 GN=tif222 PE=1 SV=1	J	Translation, ribosomal structure and biogenesis	hypothetical protein HIM_03701 [Hirsutella minnesotensis 3608]
OCS_03401	--	--	Cellular Component: proteasome complex (GO:0000502);; Cellular Component: nucleus (GO:0005634);; Cellular Component: cytosol (GO:0005829);; Molecular Function: protein complex scaffold activity (GO:0032947);; Biological Process: proteasome assembly (GO:0043248);;	K11886|0|maw:MAC_07477|K11886 proteasome component ECM29 | (RefSeq) proteasome component ECM29	--	Proteasome stabiliser	Proteasome component ECM29 OS=Saccharomyces cerevisiae (strain ATCC 204508 / S288c) OX=559292 GN=ECM29 PE=1 SV=1	S	Function unknown	proteasome component ECM29 [Ophiocordyceps sinensis CO18]
OCS_06591	[I]	Lipid transport and metabolism	Biological Process: metabolic process (GO:0008152);; Molecular Function: isomerase activity (GO:0016853);;	K07511|0|maw:MAC_00631|K07511 enoyl-CoA hydratase [EC:4.2.1.17] | (RefSeq) enoyl-CoA hydratase precursor	Fatty acid elongation (ko00062);; Fatty acid degradation (ko00071);; Valine, leucine and isoleucine degradation (ko00280);; Lysine degradation (ko00310);; Tryptophan metabolism (ko00380);; beta-Alanine metabolism (ko00410);; Propanoate metabolism (ko00640);; Butanoate metabolism (ko00650);; Biosynthesis of antibiotics (ko01130);; Carbon metabolism (ko01200);; Fatty acid metabolism (ko01212)	Enoyl-CoA hydratase/isomerase;; Enoyl-CoA hydratase/isomerase	Enoyl-CoA isomerase/hydratase fer4 OS=Ustilago maydis (strain 521 / FGSC 9021) OX=237631 GN=fer4 PE=1 SV=1	I	Lipid transport and metabolism	enoyl-CoA hydratase precursor [Ophiocordyceps sinensis CO18]
OCS_00042	--	--	Molecular Function: copper ion binding (GO:0005507);; Molecular Function: primary amine oxidase activity (GO:0008131);; Biological Process: amine metabolic process (GO:0009308);; Molecular Function: quinone binding (GO:0048038);; Biological Process: oxidation-reduction process (GO:0055114);;	--	--	Protein of unknown function (DUF3435)	--	S	Function unknown	FluG domain-containing protein [Ophiocordyceps sinensis CO18]
Ophiocordyceps_sinensis_newGene_3332	[E]	Amino acid transport and metabolism	Molecular Function: arginase activity (GO:0004053);; Biological Process: arginine metabolic process (GO:0006525);; Molecular Function: metal ion binding (GO:0046872);;	K01476|2.66331e-139|maw:MAC_01928|K01476 arginase [EC:3.5.3.1] | (RefSeq) Arginase	Arginine biosynthesis (ko00220);; Arginine and proline metabolism (ko00330);; Biosynthesis of antibiotics (ko01130);; Biosynthesis of amino acids (ko01230)	Arginase family	Arginase OS=Neurospora crassa (strain ATCC 24698 / 74-OR23-1A / CBS 708.71 / DSM 1257 / FGSC 987) OX=367110 GN=aga-1 PE=1 SV=3	E	Amino acid transport and metabolism	Arginase [Hirsutella minnesotensis 3608]
OCS_02728	[I]	Lipid transport and metabolism	Molecular Function: acyl-CoA dehydrogenase activity (GO:0003995);; Molecular Function: flavin adenine dinucleotide binding (GO:0050660);; Biological Process: oxidation-reduction process (GO:0055114);;	K00249|1.67057e-160|maj:MAA_01490|K00249 acyl-CoA dehydrogenase [EC:1.3.8.7] | (RefSeq) Acyl-CoA dehydrogenase/oxidase	Fatty acid degradation (ko00071);; Valine, leucine and isoleucine degradation (ko00280);; beta-Alanine metabolism (ko00410);; Propanoate metabolism (ko00640);; Biosynthesis of antibiotics (ko01130);; Carbon metabolism (ko01200);; Fatty acid metabolism (ko01212)	Acyl-CoA dehydrogenase, C-terminal domain;; Acyl-CoA dehydrogenase, C-terminal domain	--	I	Lipid transport and metabolism	(R)-benzylsuccinyl-CoA dehydrogenase [Ophiocordyceps sinensis CO18]
Ophiocordyceps_sinensis_newGene_1065	--	--	--	--	--	--	--	--	--	hypothetical protein OCS_05807 [Ophiocordyceps sinensis CO18]
OCS_03575	[I]	Lipid transport and metabolism	Molecular Function: hydrolase activity, acting on ester bonds (GO:0016788);;	--	--	alpha/beta hydrolase fold;; Lipase (class 2)	--	S	Function unknown	lipase [Ophiocordyceps sinensis CO18]
OCS_04776	[H]	Coenzyme transport and metabolism	Molecular Function: tetrahydrofolylpolyglutamate synthase activity (GO:0004326);; Molecular Function: ATP binding (GO:0005524);; Biological Process: one-carbon metabolic process (GO:0006730);; Biological Process: tetrahydrofolylpolyglutamate biosynthetic process (GO:0046901);;	K01930|0|fpu:FPSE_00657|K01930 folylpolyglutamate synthase [EC:6.3.2.17] | (RefSeq) hypothetical protein	Folate biosynthesis (ko00790)	--	Folylpolyglutamate synthase OS=Neurospora crassa (strain ATCC 24698 / 74-OR23-1A / CBS 708.71 / DSM 1257 / FGSC 987) OX=367110 GN=met-6 PE=1 SV=2	H	Coenzyme transport and metabolism	tetrahydrofolylpolyglutamate synthase [Ophiocordyceps sinensis CO18]
OCS_05941	--	--	Cellular Component: integral component of membrane (GO:0016021);;	--	--	Membrane-associating domain	--	S	Function unknown	integral membrane protein [Ophiocordyceps sinensis CO18]
OCS_03019	--	--	--	--	--	HNH endonuclease	--	S	Function unknown	hypothetical protein OCS_03019 [Ophiocordyceps sinensis CO18]
OCS_06112	--	--	Molecular Function: phosphoprotein phosphatase activity (GO:0004721);; Cellular Component: nucleus (GO:0005634);; Biological Process: protein dephosphorylation (GO:0006470);;	K15732|0|maj:MAA_06690|K15732 RNA polymerase II subunit A C-terminal domain phosphatase [EC:3.1.3.16] | (RefSeq) NLI interacting factor	--	NLI interacting factor-like phosphatase	RNA polymerase II subunit A C-terminal domain phosphatase OS=Schizosaccharomyces pombe (strain 972 / ATCC 24843) OX=284812 GN=fcp1 PE=1 SV=1	K	Transcription	RNA Polymerase II CTD phosphatase Fcp1 [Ophiocordyceps sinensis CO18]
OCS_01055	--	--	Biological Process: MAPK cascade involved in osmosensory signaling pathway (GO:0000161);; Molecular Function: helicase activity (GO:0004386);; Molecular Function: ATP binding (GO:0005524);; Cellular Component: nucleus (GO:0005634);; Cellular Component: cytosol (GO:0005829);; Biological Process: protein folding (GO:0006457);; Molecular Function: kinase activity (GO:0016301);; Molecular Function: p…	K09554|5.65689e-171|nhe:NECHADRAFT_39137|K09554 cell division cycle protein 37 | (RefSeq) hypothetical protein	--	Cdc37 N terminal kinase binding;; Cdc37 Hsp90 binding domain	Hsp90 co-chaperone Cdc37 OS=Schizosaccharomyces pombe (strain 972 / ATCC 24843) OX=284812 GN=cdc37 PE=1 SV=1	S	Function unknown	Hsp90 co-chaperone Cdc37 [Ophiocordyceps sinensis CO18]
Ophiocordyceps_sinensis_newGene_2746	--	--	--	--	--	--	--	S	Function unknown	hypothetical protein TOPH_07390 [Tolypocladium ophioglossoides CBS 100239]
Ophiocordyceps_sinensis_newGene_1649	[R]	General function prediction only	Molecular Function: RNA polymerase II core promoter proximal region sequence-specific DNA binding (GO:0000978);; Molecular Function: transcriptional activator activity, RNA polymerase II core promoter proximal region sequence-specific binding (GO:0001077);; Cellular Component: nucleus (GO:0005634);; Cellular Component: cytosol (GO:0005829);; Biological Process: positive regulation of transcriptio…	--	--	Zinc finger, C2H2 type;; Zinc-finger double domain;; C2H2-type zinc finger	Asparagine-rich zinc finger protein AZF1 OS=Saccharomyces cerevisiae (strain ATCC 204508 / S288c) OX=559292 GN=AZF1 PE=1 SV=1	S	Function unknown	hypothetical protein HIM_06414 [Hirsutella minnesotensis 3608]
OCS_01385	--	--	Molecular Function: helicase activity (GO:0004386);;	--	--	--	--	S	Function unknown	DNA helicase [Ophiocordyceps sinensis CO18]
OCS_02064	--	--	Molecular Function: nucleic acid binding (GO:0003676);; Molecular Function: zinc ion binding (GO:0008270);;	--	--	--	--	--	--	zinc finger domain-containing protein [Ophiocordyceps sinensis CO18]
OCS_06291	--	--	--	--	--	--	--	S	Function unknown	hypothetical protein OCS_06291 [Ophiocordyceps sinensis CO18]
OCS_04407	--	--	Molecular Function: ubiquitin-protein transferase activity (GO:0004842);; Biological Process: protein ubiquitination (GO:0016567);; Molecular Function: metal ion binding (GO:0046872);;	--	--	IBR domain, a half RING-finger domain	--	S	Function unknown	ibr finger domain containing protein [Ophiocordyceps sinensis CO18]
OCS_05950	--	--	Cellular Component: endoplasmic reticulum (GO:0005783);; Cellular Component: Golgi apparatus (GO:0005794);; Molecular Function: zinc ion binding (GO:0008270);; Cellular Component: integral component of membrane (GO:0016021);; Biological Process: regulation of exocytosis (GO:0017157);; Biological Process: protein palmitoylation (GO:0018345);; Molecular Function: protein-cysteine S-palmitoyltransfe…	K20003|2.28892e-159|nhe:NECHADRAFT_103554|K20003 palmitoyltransferase ZDHHC4 [EC:2.3.1.225] | (RefSeq) hypothetical protein	--	DHHC palmitoyltransferase	Palmitoyltransferase SWF1 OS=Neurospora crassa (strain ATCC 24698 / 74-OR23-1A / CBS 708.71 / DSM 1257 / FGSC 987) OX=367110 GN=swf-1 PE=3 SV=1	S	Function unknown	DHHC zinc finger domain-containing protein [Ophiocordyceps sinensis CO18]
OCS_05843	[T]	Signal transduction mechanisms	Molecular Function: protein kinase activity (GO:0004672);; Molecular Function: ATP binding (GO:0005524);; Biological Process: protein phosphorylation (GO:0006468);;	--	--	Protein kinase domain;; Protein tyrosine kinase;; Lipopolysaccharide kinase (Kdo/WaaP) family	Cell division control protein 7 OS=Schizosaccharomyces pombe (strain 972 / ATCC 24843) OX=284812 GN=cdc7 PE=1 SV=1	T	Signal transduction mechanisms	Protein kinase-like domain protein [Ophiocordyceps sinensis CO18]
OCS_04156	--	--	--	--	--	Pathogen effector; putative necrosis-inducing factor	--	S	Function unknown	chitinase [Ophiocordyceps sinensis CO18]
OCS_04872	--	--	--	--	--	Eukaryotic protein of unknown function (DUF829)	--	S	Function unknown	PaxU [Ophiocordyceps sinensis CO18]
OCS_05099	[I]	Lipid transport and metabolism	Biological Process: metabolic process (GO:0008152);; Molecular Function: transferase activity, transferring acyl groups other than amino-acyl groups (GO:0016747);;	K07513|4.82704e-155|ncr:NCU09646|K07513 acetyl-CoA acyltransferase 1 [EC:2.3.1.16] | (RefSeq) 3-ketoacyl-CoA thiolase	--	Thiolase, N-terminal domain	3-ketoacyl-CoA thiolase B, peroxisomal OS=Candida tropicalis OX=5482 PE=3 SV=1	I	Lipid transport and metabolism	acetyl-CoA acetyltransferase [Ophiocordyceps sinensis CO18]
OCS_02117	--	--	Cellular Component: integral component of membrane (GO:0016021);;	--	--	--	--	S	Function unknown	hypothetical protein OCS_02117 [Ophiocordyceps sinensis CO18]
OCS_04381	--	--	--	--	--	--	--	--	--	hypothetical protein OCS_04381 [Ophiocordyceps sinensis CO18]
OCS_06149	--	--	--	--	--	--	--	--	--	hypothetical protein OCS_06149 [Ophiocordyceps sinensis CO18]
OCS_00491	[P]	Inorganic ion transport and metabolism	Molecular Function: monooxygenase activity (GO:0004497);; Cellular Component: integral component of membrane (GO:0016021);; Biological Process: oxidation-reduction process (GO:0055114);;	--	--	Pyridine nucleotide-disulphide oxidoreductase;; Pyridine nucleotide-disulphide oxidoreductase;; L-lysine 6-monooxygenase (NADPH-requiring);; Flavin-binding monooxygenase-like;; Pyridine nucleotide-disulphide oxidoreductase;; NAD(P)-binding Rossmann-like domain	FAD-binding monooxygenase ktnD OS=Aspergillus niger (strain CBS 513.88 / FGSC A1513) OX=425011 GN=ktnD PE=3 SV=1	P	Inorganic ion transport and metabolism	Flavin-binding monooxygenase-like family protein [Ophiocordyceps sinensis CO18]
OCS_00756	--	--	--	--	--	--	--	S	Function unknown	hypothetical protein OCS_00756 [Ophiocordyceps sinensis CO18]
OCS_03292	--	--	Molecular Function: adenosylmethionine decarboxylase activity (GO:0004014);; Biological Process: spermine biosynthetic process (GO:0006597);; Biological Process: spermidine biosynthetic process (GO:0008295);;	K01611|0|maj:MAA_09621|K01611 S-adenosylmethionine decarboxylase [EC:4.1.1.50] | (RefSeq) adenosylmethionine decarboxylase	Cysteine and methionine metabolism (ko00270);; Arginine and proline metabolism (ko00330)	Adenosylmethionine decarboxylase	S-adenosylmethionine decarboxylase proenzyme OS=Saccharomyces cerevisiae (strain ATCC 204508 / S288c) OX=559292 GN=SPE2 PE=1 SV=1	E	Amino acid transport and metabolism	S-adenosylmethionine decarboxylase [Ophiocordyceps sinensis CO18]
Ophiocordyceps_sinensis_newGene_598	[Q]	Secondary metabolites biosynthesis, transport and catabolism	Molecular Function: catalytic activity (GO:0003824);;	--	--	Polyketide synthase dehydratase;; Methyltransferase domain;; Methyltransferase domain;; Polyketide synthase dehydratase;; KR domain;; Zinc-binding dehydrogenase;; short chain dehydrogenase;; Zinc-binding dehydrogenase;; Enoyl-(Acyl carrier protein) reductase;; Acyl transferase domain;; KR domain;; Alcohol dehydrogenase GroES-like domain	Highly reducing polyketide synthase easB OS=Emericella nidulans (strain FGSC A4 / ATCC 38163 / CBS 112.46 / NRRL 194 / M139) OX=227321 GN=easB PE=3 SV=1	Q	Secondary metabolites biosynthesis, transport and catabolism	Lovastatin nonaketide synthase-like protein [Acremonium chrysogenum ATCC 11550]
OCS_06093	--	--	Molecular Function: DNA binding (GO:0003677);;	--	--	Myb-like DNA-binding domain;; Myb-like DNA-binding domain	--	K	Transcription	Homeodomain-related protein [Ophiocordyceps sinensis CO18]
OCS_01023	--	--	--	--	--	--	--	S	Function unknown	hypothetical protein OCS_01023 [Ophiocordyceps sinensis CO18]
OCS_04231	[J]	Translation, ribosomal structure and biogenesis	Biological Process: rRNA processing (GO:0006364);; Cellular Component: viral nucleocapsid (GO:0019013);; Molecular Function: snoRNA binding (GO:0030515);; Cellular Component: small-subunit processome (GO:0032040);; Cellular Component: Mpp10 complex (GO:0034457);; Molecular Function: rRNA primary transcript binding (GO:0042134);; Biological Process: ribosomal small subunit biogenesis (GO:0042274);…	K14561|0|maj:MAA_05572|K14561 U3 small nucleolar ribonucleoprotein protein IMP4 | (RefSeq) Brix domain protein	Ribosome biogenesis in eukaryotes (ko03008)	Brix domain	U3 small nucleolar ribonucleoprotein protein IMP4 OS=Ashbya gossypii (strain ATCC 10895 / CBS 109.51 / FGSC 9923 / NRRL Y-1056) OX=284811 GN=IMP4 PE=3 SV=2	AJ	RNA processing and modification;; Translation, ribosomal structure and biogenesis	U3 small nucleolar ribonucleoprotein IMP4 [Ophiocordyceps sinensis CO18]
Ophiocordyceps_sinensis_newGene_2678	[R]	General function prediction only	--	--	--	Cupin domain	--	S	Function unknown	hypothetical protein CDD81_2444 [Ophiocordyceps australis]
Ophiocordyceps_sinensis_newGene_4160	--	--	--	--	--	--	--	S	Function unknown	hypothetical protein TOPH_05367, partial [Tolypocladium ophioglossoides CBS 100239]
OCS_01131	[L]	Replication, recombination and repair	Molecular Function: endonuclease activity (GO:0004519);; Cellular Component: mitochondrion (GO:0005739);; Cellular Component: integral component of membrane (GO:0016021);; Molecular Function: metal ion binding (GO:0046872);; Biological Process: nucleic acid phosphodiester bond hydrolysis (GO:0090305);;	--	--	Staphylococcal nuclease homologue	Probable endonuclease LCL3 OS=Nectria haematococca (strain 77-13-4 / ATCC MYA-4622 / FGSC 9596 / MPVI) OX=660122 GN=LCL3 PE=3 SV=1	L	Replication, recombination and repair	nuclease domain containing protein [Ophiocordyceps sinensis CO18]
OCS_04217	--	--	--	--	--	--	--	--	--	hypothetical protein OCS_04217 [Ophiocordyceps sinensis CO18]
OCS_06414	[M]	Cell wall/membrane/envelope biogenesis	Molecular Function: DNA ligase activity (GO:0003909);; Molecular Function: transferase activity (GO:0016740);; Biological Process: DNA ligation involved in DNA repair (GO:0051103);;	--	--	RmlD substrate binding domain;; NAD dependent epimerase/dehydratase family;; Male sterility protein	--	M	Cell wall/membrane/envelope biogenesis	NAD dependent epimerase/dehydratase family protein [Ophiocordyceps sinensis CO18]
OCS_03761	--	--	--	--	--	--	--	--	--	hypothetical protein OCS_03761 [Ophiocordyceps sinensis CO18]
OCS_04162	--	--	--	--	--	--	--	S	Function unknown	hypothetical protein OCS_04162 [Ophiocordyceps sinensis CO18]
Ophiocordyceps_sinensis_newGene_743	--	--	Biological Process: cellular process (GO:0009987);;	--	--	CVNH domain	--	--	--	hypothetical protein TRIVIDRAFT_183048 [Trichoderma virens Gv29-8]
OCS_01627	--	--	Cellular Component: nucleus (GO:0005634);; Biological Process: mitotic DNA replication termination (GO:1902979);;	--	--	Rtf2 RING-finger	Replication termination factor 2 OS=Schizosaccharomyces pombe (strain 972 / ATCC 24843) OX=284812 GN=rtf2 PE=1 SV=1	S	Function unknown	DUF602 domain-containing protein [Ophiocordyceps sinensis CO18]
Ophiocordyceps_sinensis_newGene_2535	--	--	--	--	--	--	--	S	Function unknown	hypothetical protein CDD83_6175 [Cordyceps sp. RAO-2017]
OCS_02194	--	--	--	--	--	--	--	--	--	hypothetical protein OCS_02194 [Ophiocordyceps sinensis CO18]
OCS_05659	--	--	--	--	--	--	Mono- and diacylglycerol lipase OS=Penicillium cyclopium OX=60167 GN=mdlA PE=1 SV=1	S	Function unknown	lipase [Ophiocordyceps sinensis CO18]
OCS_03458	--	--	--	--	--	--	--	S	Function unknown	hypothetical protein OCS_03458 [Ophiocordyceps sinensis CO18]
OCS_00478	--	--	Cellular Component: integral component of membrane (GO:0016021);;	--	--	Domain of unknown function (DUF3328)	Oxidase ustYa OS=Aspergillus flavus (strain ATCC 200026 / FGSC A1120 / NRRL 3357 / JCM 12722 / SRRC 167) OX=332952 GN=ustYa PE=1 SV=1	S	Function unknown	hypothetical protein OCS_00478 [Ophiocordyceps sinensis CO18]
OCS_02038	--	--	Molecular Function: protein kinase activity (GO:0004672);; Molecular Function: ATP binding (GO:0005524);; Biological Process: protein phosphorylation (GO:0006468);;	--	--	Prion-inhibition and propagation	--	S	Function unknown	HET-s/LopB domain protein [Ophiocordyceps sinensis CO18]
Ophiocordyceps_sinensis_newGene_1773	[R]	General function prediction only	--	--	--	NAD(P)H-binding	--	GM	Carbohydrate transport and metabolism;; Cell wall/membrane/envelope biogenesis	hypothetical protein HIM_08306 [Hirsutella minnesotensis 3608]
OCS_00469	--	--	--	--	--	--	--	--	--	hypothetical protein OCS_00469 [Ophiocordyceps sinensis CO18]
OCS_05157	--	--	Biological Process: autophagosome assembly (GO:0000045);; Cellular Component: pre-autophagosomal structure (GO:0000407);; Biological Process: autophagy of mitochondrion (GO:0000422);; Molecular Function: protein serine/threonine kinase activity (GO:0004674);; Molecular Function: ATP binding (GO:0005524);; Cellular Component: cytosol (GO:0005829);; Biological Process: protein localization by the C…	K08269|2.84364e-165|maj:MAA_03501|K08269 serine/threonine-protein kinase ULK/ATG1 [EC:2.7.11.1] | (RefSeq) Protein kinase-like protein	Regulation of mitophagy - yeast (ko04139);; Regulation of autophagy (ko04140)	Domain of unknown function (DUF3543)	Serine/threonine-protein kinase ATG1 OS=Magnaporthe oryzae (strain 70-15 / ATCC MYA-4617 / FGSC 8958) OX=242507 GN=ATG1 PE=1 SV=1	T	Signal transduction mechanisms	Serine/threonine-protein kinase [Ophiocordyceps sinensis CO18]
OCS_05974	[J]	Translation, ribosomal structure and biogenesis	Molecular Function: tryptophan-tRNA ligase activity (GO:0004830);; Molecular Function: ATP binding (GO:0005524);; Cellular Component: mitochondrion (GO:0005739);; Molecular Function: isomerase activity (GO:0016853);; Biological Process: mitochondrial tryptophanyl-tRNA aminoacylation (GO:0070183);;	K01867|2.41438e-41|tre:TRIREDRAFT_82442|K01867 tryptophanyl-tRNA synthetase [EC:6.1.1.2] | (RefSeq) tryptophanyl-tRNA synthetase	Aminoacyl-tRNA biosynthesis (ko00970)	tRNA synthetases class I (W and Y)	Tryptophan--tRNA ligase, mitochondrial OS=Schizosaccharomyces pombe (strain 972 / ATCC 24843) OX=284812 GN=msw1 PE=3 SV=1	J	Translation, ribosomal structure and biogenesis	tryptophanyl-tRNA synthetase [Ophiocordyceps sinensis CO18]
Ophiocordyceps_sinensis_newGene_2062	--	--	--	--	--	--	--	S	Function unknown	Uncharacterized protein TCAP_01345 [Tolypocladium capitatum]
OCS_01756	--	--	--	--	--	Coiled-coil domain-containing protein 55 (DUF2040)	Nuclear speckle splicing regulatory protein 1 homolog OS=Schizosaccharomyces pombe (strain 972 / ATCC 24843) OX=284812 GN=SPAC29A4.06c PE=3 SV=1	S	Function unknown	coiled-coil domain-containing protein 55 [Ophiocordyceps sinensis CO18]
OCS_00528	--	--	--	--	--	--	--	--	--	hypothetical protein OCS_00528 [Ophiocordyceps sinensis CO18]
Ophiocordyceps_sinensis_newGene_2945	--	--	Molecular Function: RNA polymerase II transcription factor activity, sequence-specific DNA binding (GO:0000981);; Molecular Function: DNA binding (GO:0003677);; Cellular Component: nucleus (GO:0005634);; Biological Process: regulation of transcription from RNA polymerase II promoter (GO:0006357);; Molecular Function: zinc ion binding (GO:0008270);;	--	--	Fungal Zn(2)-Cys(6) binuclear cluster domain	Cutinase transcription factor 1 beta OS=Fusarium solani subsp. pisi OX=70791 GN=CTF1-BETA PE=2 SV=1	K	Transcription	Cutinase transcription factor 1 beta [Hirsutella minnesotensis 3608]
OCS_01242	[I]	Lipid transport and metabolism	Biological Process: metabolic process (GO:0008152);; Molecular Function: transferase activity, transferring acyl groups other than amino-acyl groups (GO:0016747);;	K00626|0|maj:MAA_06480|K00626 acetyl-CoA C-acetyltransferase [EC:2.3.1.9] | (RefSeq) acetyl-CoA acetyltransferase	Fatty acid degradation (ko00071);; Synthesis and degradation of ketone bodies (ko00072);; Valine, leucine and isoleucine degradation (ko00280);; Lysine degradation (ko00310);; Tryptophan metabolism (ko00380);; Pyruvate metabolism (ko00620);; Glyoxylate and dicarboxylate metabolism (ko00630);; Propanoate metabolism (ko00640);; Butanoate metabolism (ko00650);; Terpenoid backbone biosynthesis (ko009…	Thiolase, N-terminal domain;; Thiolase, C-terminal domain;; Beta-ketoacyl synthase, N-terminal domain	Acetyl-CoA acetyltransferase OS=Yarrowia lipolytica (strain CLIB 122 / E 150) OX=284591 GN=PAT1 PE=3 SV=1	I	Lipid transport and metabolism	acetyl-CoA acetyltransferase [Ophiocordyceps sinensis CO18]
OCS_02015	--	--	Cellular Component: cytosol (GO:0005829);; Molecular Function: protein transporter activity (GO:0008565);; Cellular Component: membrane (GO:0016020);; Biological Process: metal ion transport (GO:0030001);; Cellular Component: mitochondrial intermembrane space protein transporter complex (GO:0042719);; Biological Process: protein import into mitochondrial inner membrane (GO:0045039);; Molecular Fu…	K17780|1.39755e-53|tre:TRIREDRAFT_107601|K17780 mitochondrial import inner membrane translocase subunit TIM8 | (RefSeq) Zn-finger protein	--	Tim10/DDP family zinc finger	Mitochondrial import inner membrane translocase subunit TIM8 OS=Gibberella zeae (strain PH-1 / ATCC MYA-4620 / FGSC 9075 / NRRL 31084) OX=229533 GN=TIM8 PE=3 SV=1	O	Posttranslational modification, protein turnover, chaperones	Zn-finger protein [Ophiocordyceps sinensis CO18]
OCS_06522	--	--	--	--	--	--	--	S	Function unknown	hypothetical protein OCS_06522 [Ophiocordyceps sinensis CO18]
OCS_03362	[O]	Posttranslational modification, protein turnover, chaperones	--	--	--	Pyroglutamyl peptidase	--	S	Function unknown	Peptidase C15, pyroglutamyl peptidase I-like protein [Ophiocordyceps sinensis CO18]
OCS_02185	--	--	Cellular Component: fungal-type vacuole (GO:0000324);; Molecular Function: metal ion binding (GO:0046872);; Molecular Function: iron-sulfur cluster binding (GO:0051536);;	--	--	FYVE zinc finger	FYVE-type zinc finger-containing protein C9B6.03 OS=Schizosaccharomyces pombe (strain 972 / ATCC 24843) OX=284812 GN=SPBC9B6.03 PE=1 SV=1	S	Function unknown	zinc finger domain-containing protein [Ophiocordyceps sinensis CO18]
OCS_04003	[S]	Function unknown	--	--	--	AMMECR1	Uncharacterized protein C688.03c OS=Schizosaccharomyces pombe (strain 972 / ATCC 24843) OX=284812 GN=SPAC688.03c PE=4 SV=2	S	Function unknown	ammecr1 family protein [Ophiocordyceps sinensis CO18]
OCS_00484	[I]	Lipid transport and metabolism	Molecular Function: methyltransferase activity (GO:0008168);; Biological Process: methylation (GO:0032259);;	--	--	Methyltransferase domain;; Methyltransferase domain;; Methyltransferase domain;; Mycolic acid cyclopropane synthetase;; Methyltransferase domain;; Methyltransferase small domain	--	S	Function unknown	methyltransferase type 12 [Ophiocordyceps sinensis CO18]
OCS_03334	--	--	Molecular Function: RNA polymerase II transcription factor activity, sequence-specific DNA binding (GO:0000981);; Molecular Function: DNA binding (GO:0003677);; Cellular Component: nucleus (GO:0005634);; Cellular Component: cytoplasm (GO:0005737);; Biological Process: regulation of transcription from RNA polymerase II promoter (GO:0006357);; Molecular Function: zinc ion binding (GO:0008270);;	--	--	Fungal specific transcription factor domain;; Fungal Zn(2)-Cys(6) binuclear cluster domain	Uncharacterized transcriptional regulatory protein C1327.01c OS=Schizosaccharomyces pombe (strain 972 / ATCC 24843) OX=284812 GN=SPAC1327.01c PE=1 SV=2	K	Transcription	zinc finger transcription factor 1 [Ophiocordyceps sinensis CO18]
Ophiocordyceps_sinensis_newGene_3271	--	--	--	--	--	--	--	--	--	zinc finger domain-containing protein [Ophiocordyceps sinensis CO18]
Ophiocordyceps_sinensis_newGene_3257	--	--	--	--	--	--	--	U	Intracellular trafficking, secretion, and vesicular transport	hypothetical protein CDD83_1660 [Cordyceps sp. RAO-2017]
Ophiocordyceps_sinensis_newGene_354	[T]	Signal transduction mechanisms	Cellular Component: membrane (GO:0016020);;	--	--	NACHT domain;; Phosphorylase superfamily	Vegetative incompatibility protein HET-E-1 OS=Podospora anserina OX=5145 GN=HET-E1 PE=4 SV=1	S	Function unknown	Vegetative incompatibility protein HET-E-1 [Tolypocladium ophioglossoides CBS 100239]
OCS_05781	--	--	--	--	--	Uncharacterized protein conserved in bacteria (DUF2345);; Crisp	--	--	--	--
Ophiocordyceps_sinensis_newGene_2470	[I]	Lipid transport and metabolism	Molecular Function: acyl-CoA dehydrogenase activity (GO:0003995);; Molecular Function: flavin adenine dinucleotide binding (GO:0050660);; Biological Process: oxidation-reduction process (GO:0055114);;	K00249|6.70165e-77|maj:MAA_01490|K00249 acyl-CoA dehydrogenase [EC:1.3.8.7] | (RefSeq) Acyl-CoA dehydrogenase/oxidase	Fatty acid degradation (ko00071);; Valine, leucine and isoleucine degradation (ko00280);; beta-Alanine metabolism (ko00410);; Propanoate metabolism (ko00640);; Biosynthesis of antibiotics (ko01130);; Carbon metabolism (ko01200);; Fatty acid metabolism (ko01212)	Acyl-CoA dehydrogenase, N-terminal domain	--	I	Lipid transport and metabolism	Acyl-CoA dehydrogenase family member 11 [Tolypocladium ophioglossoides CBS 100239]
OCS_02659	[I]	Lipid transport and metabolism	Molecular Function: fatty-acyl-CoA binding (GO:0000062);; Cellular Component: nucleus (GO:0005634);; Cellular Component: cytosol (GO:0005829);;	K08762|8.26512e-32|tmn:UCRPA7_8084|K08762 diazepam-binding inhibitor (GABA receptor modulator, acyl-CoA-binding protein) | (RefSeq) putative acyl binding protein	--	Acyl CoA binding protein	--	I	Lipid transport and metabolism	acyl CoA binding protein [Ophiocordyceps sinensis CO18]
OCS_06017	--	--	--	--	--	--	--	S	Function unknown	hypothetical protein OCS_06017 [Ophiocordyceps sinensis CO18]
OCS_00843	--	--	Cellular Component: integral component of membrane (GO:0016021);; Molecular Function: transferase activity (GO:0016740);;	--	--	Glycosyl transferase family group 2	--	S	Function unknown	hypothetical protein OCS_00843 [Ophiocordyceps sinensis CO18]
OCS_02896	[R]	General function prediction only	Molecular Function: copper ion binding (GO:0005507);; Cellular Component: integral component of membrane (GO:0016021);; Molecular Function: oxidoreductase activity (GO:0016491);; Biological Process: oxidation-reduction process (GO:0055114);;	--	--	Flavin containing amine oxidoreductase;; NAD(P)-binding Rossmann-like domain;; FAD-NAD(P)-binding	Putative glutamate synthase [NADPH] OS=Schizosaccharomyces pombe (strain 972 / ATCC 24843) OX=284812 GN=glt1 PE=2 SV=1	S	Function unknown	amine oxidase [Ophiocordyceps sinensis CO18]
OCS_05885	[C]	Energy production and conversion	Molecular Function: oxidoreductase activity (GO:0016491);; Biological Process: oxidation-reduction process (GO:0055114);;	--	--	Pyridine nucleotide-disulphide oxidoreductase;; Pyridine nucleotide-disulphide oxidoreductase;; L-lysine 6-monooxygenase (NADPH-requiring)	Oxidoreductase ptaL OS=Pestalotiopsis fici (strain W106-1 / CGMCC3.15140) OX=1229662 GN=ptaL PE=2 SV=1	S	Function unknown	Pyridine nucleotide-disulfide oxidoreductase, NAD-binding domain protein [Ophiocordyceps sinensis CO18]
OCS_04504	--	--	Molecular Function: transferase activity (GO:0016740);;	--	--	--	--	S	Function unknown	alphaN-acetylglucosamine transferase [Ophiocordyceps sinensis CO18]
OCS_06935	--	--	Cellular Component: integral component of membrane (GO:0016021);; Molecular Function: oxidoreductase activity (GO:0016491);; Biological Process: oxidation-reduction process (GO:0055114);;	--	--	Ferric reductase NAD binding domain	Probable ferric reductase transmembrane component OS=Candida albicans OX=5476 GN=CFL1 PE=3 SV=1	U	Intracellular trafficking, secretion, and vesicular transport	Ferric reductase, NAD binding protein [Ophiocordyceps sinensis CO18]
OCS_00126	--	--	--	--	--	--	--	--	--	hypothetical protein OCS_00126 [Ophiocordyceps sinensis CO18]
OCS_03060	--	--	Molecular Function: cytochrome-c oxidase activity (GO:0004129);; Cellular Component: mitochondrial respiratory chain complex IV (GO:0005751);; Biological Process: mitochondrial electron transport, cytochrome c to oxygen (GO:0006123);; Molecular Function: zinc ion binding (GO:0008270);; Biological Process: aerobic respiration (GO:0009060);; Biological Process: hydrogen ion transmembrane transport …	K02265|3.94763e-99|maw:MAC_01590|K02265 cytochrome c oxidase subunit 5b | (RefSeq) hypothetical protein	Oxidative phosphorylation (ko00190)	Cytochrome c oxidase subunit Vb	Cytochrome c oxidase subunit 4, mitochondrial OS=Neurospora crassa (strain ATCC 24698 / 74-OR23-1A / CBS 708.71 / DSM 1257 / FGSC 987) OX=367110 GN=cox-4 PE=3 SV=2	O	Posttranslational modification, protein turnover, chaperones	Cytochrome c oxidase, subunit Vb [Ophiocordyceps sinensis CO18]
Ophiocordyceps_sinensis_newGene_4046	--	--	--	--	--	--	--	--	--	hypothetical protein HIM_12126 [Hirsutella minnesotensis 3608]
OCS_00706	--	--	Molecular Function: kinase activity (GO:0016301);; Biological Process: phosphorylation (GO:0016310);;	--	--	Phosphotransferase enzyme family	--	--	--	Protein kinase-like domain protein [Ophiocordyceps sinensis CO18]
OCS_01291	--	--	--	--	--	--	--	S	Function unknown	hypothetical protein OCS_01291 [Ophiocordyceps sinensis CO18]
OCS_00639	--	--	--	--	--	--	--	--	--	hypothetical protein OCS_00639 [Ophiocordyceps sinensis CO18]
OCS_03222	--	--	Cellular Component: integral component of membrane (GO:0016021);;	--	--	Domain of unknown function (DUF3328)	Cyclochlorotine biosynthesis protein O OS=Talaromyces islandicus OX=28573 GN=cctO PE=3 SV=1	S	Function unknown	hypothetical protein OCS_03222 [Ophiocordyceps sinensis CO18]
OCS_05743	--	--	--	--	--	--	--	S	Function unknown	hypothetical protein OCS_05743 [Ophiocordyceps sinensis CO18]
Ophiocordyceps_sinensis_newGene_789	--	--	--	K20310|6.4696e-135|fgr:FGSG_12900|K20310 trafficking protein particle complex subunit 13 | (RefSeq) hypothetical protein	--	Protein of unknown function (DUF974)	--	S	Function unknown	hypothetical protein CDD83_10747 [Cordyceps sp. RAO-2017]
OCS_04604	--	--	--	--	--	--	--	S	Function unknown	hypothetical protein OCS_04604 [Ophiocordyceps sinensis CO18]
OCS_05711	--	--	Molecular Function: translation initiation factor activity (GO:0003743);; Biological Process: translational initiation (GO:0006413);;	K15026|0|maj:MAA_04536|K15026 translation initiation factor 2A | (RefSeq) Translation initiation factor 2A	--	Eukaryotic translation initiation factor eIF2A	Eukaryotic translation initiation factor 2A OS=Schizosaccharomyces pombe (strain 972 / ATCC 24843) OX=284812 GN=SPBC4B4.04 PE=1 SV=1	J	Translation, ribosomal structure and biogenesis	Translation initiation factor 2A, beta propellor-like domain protein [Ophiocordyceps sinensis CO18]
OCS_04851	--	--	Molecular Function: zinc ion binding (GO:0008270);;	--	--	MIZ/SP-RING zinc finger	E3 SUMO-protein ligase pli1 OS=Schizosaccharomyces pombe (strain 972 / ATCC 24843) OX=284812 GN=pli1 PE=1 SV=3	S	Function unknown	MIZ zinc finger protein [Ophiocordyceps sinensis CO18]
Ophiocordyceps_sinensis_newGene_3942	--	--	--	--	--	--	--	S	Function unknown	hypothetical protein XA68_11920 [Ophiocordyceps unilateralis]
OCS_02379	--	--	Cellular Component: integral component of membrane (GO:0016021);;	--	--	--	--	--	--	hypothetical protein OCS_02379 [Ophiocordyceps sinensis CO18]
Ophiocordyceps_sinensis_newGene_2975	--	--	Cellular Component: nucleus (GO:0005634);; Cellular Component: cytosol (GO:0005829);;	--	--	--	--	S	Function unknown	predicted protein [[Nectria] haematococca mpVI 77-13-4]
Ophiocordyceps_sinensis_newGene_3872	[C]	Energy production and conversion	Molecular Function: oxidoreductase activity, acting on the aldehyde or oxo group of donors, NAD or NADP as acceptor (GO:0016620);; Biological Process: oxidation-reduction process (GO:0055114);;	--	--	Aldehyde dehydrogenase family	--	C	Energy production and conversion	hypothetical protein HIM_00576 [Hirsutella minnesotensis 3608]
Ophiocordyceps_sinensis_newGene_1057	[QV]	Secondary metabolites biosynthesis, transport and catabolism;; Defense mechanisms	Molecular Function: monooxygenase activity (GO:0004497);; Molecular Function: iron ion binding (GO:0005506);; Cellular Component: membrane (GO:0016020);; Molecular Function: oxidoreductase activity, acting on paired donors, with incorporation or reduction of molecular oxygen (GO:0016705);; Molecular Function: heme binding (GO:0020037);; Biological Process: oxidation-reduction process (GO:0055114)…	--	--	Cytochrome P450	Cytochrome P450 52A13 OS=Debaryomyces hansenii OX=4959 GN=CYP52A13 PE=2 SV=1	Q	Secondary metabolites biosynthesis, transport and catabolism	hypothetical protein CDD83_8795 [Cordyceps sp. RAO-2017]
Ophiocordyceps_sinensis_newGene_2996	--	--	--	K21016|4.54016e-19|ela:UCREL1_3212|K21016 feruloyl esterase [EC:3.1.1.73] | (RefSeq) putative feruloyl esterase a protein	--	--	Probable feruloyl esterase A OS=Aspergillus terreus (strain NIH 2624 / FGSC A1156) OX=341663 GN=faeA PE=3 SV=1	S	Function unknown	hypothetical protein HIM_01495 [Hirsutella minnesotensis 3608]
OCS_06729	--	--	--	--	--	--	--	--	--	hypothetical protein OCS_06729 [Ophiocordyceps sinensis CO18]
OCS_00614	--	--	--	--	--	--	--	--	--	hypothetical protein OCS_00614 [Ophiocordyceps sinensis CO18]
Ophiocordyceps_sinensis_newGene_383	--	--	Molecular Function: transferase activity (GO:0016740);;	--	--	--	--	O	Posttranslational modification, protein turnover, chaperones	hypothetical protein HIM_04839 [Hirsutella minnesotensis 3608]
OCS_06916	--	--	--	--	--	--	--	--	--	hypothetical protein OCS_06916 [Ophiocordyceps sinensis CO18]
OCS_04372	[S]	Function unknown	Molecular Function: catalytic activity (GO:0003824);;	--	--	Phosphoenolpyruvate hydrolase-like	--	S	Function unknown	hypothetical protein OCS_04372 [Ophiocordyceps sinensis CO18]
OCS_04267	--	--	Molecular Function: protein kinase activity (GO:0004672);; Molecular Function: ATP binding (GO:0005524);; Biological Process: protein phosphorylation (GO:0006468);;	--	--	--	--	T	Signal transduction mechanisms	CMGC/SRPK protein kinase [Ophiocordyceps sinensis CO18]
OCS_01483	--	--	--	--	--	F-box-like	--	--	--	F-box domain protein [Ophiocordyceps sinensis CO18]
OCS_04853	[N]	Cell motility	Molecular Function: chitin synthase activity (GO:0004100);; Cellular Component: plasma membrane (GO:0005886);; Biological Process: chitin biosynthetic process (GO:0006031);; Cellular Component: integral component of membrane (GO:0016021);; Cellular Component: chitosome (GO:0045009);;	K00698|0|tre:TRIREDRAFT_112271|K00698 chitin synthase [EC:2.4.1.16] | (RefSeq) glycosyltransferase family 2, chitin synthase	Amino sugar and nucleotide sugar metabolism (ko00520)	Chitin synthase;; Chitin synthase N-terminal;; Chitin synthase;; Glycosyl transferase family group 2	Chitin synthase 3 OS=Neurospora crassa (strain ATCC 24698 / 74-OR23-1A / CBS 708.71 / DSM 1257 / FGSC 987) OX=367110 GN=chs-3 PE=3 SV=2	M	Cell wall/membrane/envelope biogenesis	glycosyltransferase family 2 protein [Ophiocordyceps sinensis CO18]
OCS_06841	--	--	--	--	--	--	--	S	Function unknown	polyprotein [Ophiocordyceps sinensis CO18]
Ophiocordyceps_sinensis_newGene_4696	[Q]	Secondary metabolites biosynthesis, transport and catabolism	Molecular Function: oxidoreductase activity (GO:0016491);; Biological Process: oxidation-reduction process (GO:0055114);;	--	--	Aldo/keto reductase family	Uncharacterized oxidoreductase C8E4.04 OS=Schizosaccharomyces pombe (strain 972 / ATCC 24843) OX=284812 GN=SPBC8E4.04 PE=3 SV=1	S	Function unknown	2,5-diketo-D-gluconic acid reductase [Fusarium fujikuroi]
Ophiocordyceps_sinensis_newGene_345	--	--	Molecular Function: protein prenyltransferase activity (GO:0008318);; Biological Process: protein prenylation (GO:0018342);; Cellular Component: intracellular organelle (GO:0043229);; Cellular Component: cytoplasmic part (GO:0044444);; Biological Process: intracellular transport (GO:0046907);;	K14050|7.76805e-100|mtm:MYCTH_2311786|K14050 geranylgeranyl transferase type-2 subunit alpha [EC:2.5.1.60] | (RefSeq) hypothetical protein	--	Protein prenyltransferase alpha subunit repeat;; Protein prenyltransferase alpha subunit repeat	Geranylgeranyl transferase type-2 subunit alpha OS=Candida albicans OX=5476 GN=BET4 PE=3 SV=1	O	Posttranslational modification, protein turnover, chaperones	Geranylgeranyl transferase type-2 subunit alpha [Tolypocladium paradoxum]
Ophiocordyceps_sinensis_newGene_3256	--	--	--	--	--	--	--	U	Intracellular trafficking, secretion, and vesicular transport	hypothetical protein CDD83_1660 [Cordyceps sp. RAO-2017]
OCS_05961	--	--	Biological Process: regulation of transcription, DNA-templated (GO:0006355);; Molecular Function: metal ion binding (GO:0046872);;	--	--	Fungal specific transcription factor domain	Xylanolytic transcriptional activator xlnR OS=Neosartorya fischeri (strain ATCC 1020 / DSM 3700 / CBS 544.65 / FGSC A1164 / JCM 1740 / NRRL 181 / WB 181) OX=331117 GN=xlnR PE=3 SV=2	K	Transcription	XlnR [Ophiocordyceps sinensis CO18]
OCS_00277	[P]	Inorganic ion transport and metabolism	Cellular Component: fungal-type vacuole membrane (GO:0000329);; Cellular Component: endoplasmic reticulum (GO:0005783);; Biological Process: cellular calcium ion homeostasis (GO:0006874);; Molecular Function: calcium:proton antiporter activity (GO:0015369);; Molecular Function: potassium:proton antiporter activity (GO:0015386);; Cellular Component: integral component of membrane (GO:0016021);; Bi…	K07300|0|maj:MAA_02171|K07300 Ca2+:H+ antiporter | (RefSeq) Calcium/proton exchanger	--	Sodium/calcium exchanger protein	Vacuolar calcium ion transporter OS=Schizosaccharomyces pombe (strain 972 / ATCC 24843) OX=284812 GN=vcx1 PE=3 SV=1	P	Inorganic ion transport and metabolism	calcium/proton exchanger [Ophiocordyceps sinensis CO18]
OCS_03800	[O]	Posttranslational modification, protein turnover, chaperones	Biological Process: protein peptidyl-prolyl isomerization (GO:0000413);; Molecular Function: peptidyl-prolyl cis-trans isomerase activity (GO:0003755);; Biological Process: protein folding (GO:0006457);;	K12733|3.99352e-78|fgr:FGSG_08777|K12733 peptidyl-prolyl cis-trans isomerase-like 1 [EC:5.2.1.8] | (RefSeq) peptidyl-prolyl cis-trans isomerase ppi1	Spliceosome (ko03040)	Cyclophilin type peptidyl-prolyl cis-trans isomerase/CLD	Peptidyl-prolyl cis-trans isomerase-like 1 OS=Gibberella zeae (strain PH-1 / ATCC MYA-4620 / FGSC 9075 / NRRL 31084) OX=229533 GN=CYP1 PE=3 SV=1	O	Posttranslational modification, protein turnover, chaperones	Peptidyl-prolyl cis-trans isomerase, cyclophilin-type [Ophiocordyceps sinensis CO18]
Ophiocordyceps_sinensis_newGene_2511	--	--	--	--	--	--	--	S	Function unknown	hypothetical protein HIM_11279 [Hirsutella minnesotensis 3608]
Ophiocordyceps_sinensis_newGene_1542	--	--	--	--	--	--	--	S	Function unknown	hypothetical protein FOQG_14932 [Fusarium oxysporum f. sp. raphani 54005]
OCS_00439	[F]	Nucleotide transport and metabolism	Molecular Function: IMP cyclohydrolase activity (GO:0003937);; Molecular Function: phosphoribosylaminoimidazolecarboxamide formyltransferase activity (GO:0004643);; Cellular Component: cytosol (GO:0005829);; Biological Process: 'de novo' IMP biosynthetic process (GO:0006189);;	K00602|0|tre:TRIREDRAFT_75506|K00602 phosphoribosylaminoimidazolecarboxamide formyltransferase / IMP cyclohydrolase [EC:2.1.2.3 3.5.4.10] | (RefSeq) hypothetical protein	Purine metabolism (ko00230);; One carbon pool by folate (ko00670);; Biosynthesis of antibiotics (ko01130)	AICARFT/IMPCHase bienzyme;; MGS-like domain	Bifunctional purine biosynthesis protein ADE17 OS=Saccharomyces cerevisiae (strain ATCC 204508 / S288c) OX=559292 GN=ADE17 PE=1 SV=2	F	Nucleotide transport and metabolism	bifunctional purine biosynthesis protein [Ophiocordyceps sinensis CO18]
OCS_01384	[L]	Replication, recombination and repair	--	--	--	AAA domain	--	L	Replication, recombination and repair	hypothetical protein OCS_01384 [Ophiocordyceps sinensis CO18]
OCS_05804	--	--	--	--	--	Heterokaryon incompatibility protein Het-C	--	S	Function unknown	heterokaryon incompatibility protein Het-C [Ophiocordyceps sinensis CO18]
Ophiocordyceps_sinensis_newGene_2180	--	--	Cellular Component: membrane (GO:0016020);;	--	--	Abscisic acid G-protein coupled receptor	--	U	Intracellular trafficking, secretion, and vesicular transport	hypothetical protein A0O28_0068460 [Trichoderma guizhouense]
OCS_01884	--	--	--	--	--	--	--	S	Function unknown	hypothetical protein OCS_01884 [Ophiocordyceps sinensis CO18]
OCS_05265	[C]	Energy production and conversion	Molecular Function: malate synthase activity (GO:0004474);; Biological Process: glyoxylate cycle (GO:0006097);; Biological Process: tricarboxylic acid cycle (GO:0006099);;	K01638|0|maj:MAA_07376|K01638 malate synthase [EC:2.3.3.9] | (RefSeq) malate synthase	Pyruvate metabolism (ko00620);; Glyoxylate and dicarboxylate metabolism (ko00630);; Carbon metabolism (ko01200)	Malate synthase	Malate synthase, glyoxysomal OS=Neurospora crassa (strain ATCC 24698 / 74-OR23-1A / CBS 708.71 / DSM 1257 / FGSC 987) OX=367110 GN=acu-9 PE=3 SV=2	C	Energy production and conversion	malate synthase [Ophiocordyceps sinensis CO18]
Ophiocordyceps_sinensis_newGene_3885	[Q]	Secondary metabolites biosynthesis, transport and catabolism	Molecular Function: oxidoreductase activity (GO:0016491);; Molecular Function: transferase activity (GO:0016740);; Molecular Function: phosphopantetheine binding (GO:0031177);; Biological Process: oxidation-reduction process (GO:0055114);;	--	--	Polyketide synthase dehydratase;; Acyl transferase domain;; Beta-ketoacyl synthase, N-terminal domain;; Beta-ketoacyl synthase, C-terminal domain;; Acyl transferase domain	Reducing polyketide synthase DEP5 OS=Fusarium langsethiae OX=179993 GN=DEP5 PE=2 SV=1	Q	Secondary metabolites biosynthesis, transport and catabolism	hypothetical protein HIM_03043 [Hirsutella minnesotensis 3608]
OCS_06717	--	--	--	--	--	--	--	S	Function unknown	hypothetical protein OCS_06717 [Ophiocordyceps sinensis CO18]
OCS_04882	[Q]	Secondary metabolites biosynthesis, transport and catabolism	Molecular Function: iron ion binding (GO:0005506);; Molecular Function: dioxygenase activity (GO:0051213);; Biological Process: oxidation-reduction process (GO:0055114);;	--	--	non-haem dioxygenase in morphine synthesis N-terminal;; 2OG-Fe(II) oxygenase superfamily	2-oxoglutarate-Fe(II) type oxidoreductase hxnY OS=Emericella nidulans (strain FGSC A4 / ATCC 38163 / CBS 112.46 / NRRL 194 / M139) OX=227321 GN=hxnY PE=2 SV=1	S	Function unknown	2OG-Fe(II) oxygenase [Ophiocordyceps sinensis CO18]
OCS_03490	[E]	Amino acid transport and metabolism	Molecular Function: amidinotransferase activity (GO:0015067);;	K00613|8.15785e-169|ure:UREG_04197|K00613 glycine amidinotransferase [EC:2.1.4.1] | (RefSeq) hypothetical protein	Glycine, serine and threonine metabolism (ko00260);; Arginine and proline metabolism (ko00330)	Amidinotransferase	--	E	Amino acid transport and metabolism	lysine amidinotransferase [Ophiocordyceps sinensis CO18]
OCS_04248	--	--	Molecular Function: phosphatidylinositol-4,5-bisphosphate 5-phosphatase activity (GO:0004439);; Molecular Function: endonuclease activity (GO:0004519);; Molecular Function: exonuclease activity (GO:0004527);; Cellular Component: endoplasmic reticulum (GO:0005783);; Cellular Component: integral component of membrane (GO:0016021);; Biological Process: phosphatidylinositol dephosphorylation (GO:0046…	--	--	Endonuclease/Exonuclease/phosphatase family	Polyphosphatidylinositol phosphatase INP53 OS=Saccharomyces cerevisiae (strain ATCC 204508 / S288c) OX=559292 GN=INP53 PE=1 SV=1	T	Signal transduction mechanisms	Endonuclease/exonuclease/phosphatase [Ophiocordyceps sinensis CO18]
OCS_06363	--	--	--	--	--	--	--	S	Function unknown	hypothetical protein OCS_06363 [Ophiocordyceps sinensis CO18]
OCS_06831	--	--	Molecular Function: FMN binding (GO:0010181);; Molecular Function: oxidoreductase activity (GO:0016491);; Biological Process: oxidation-reduction process (GO:0055114);;	--	--	Pyridoxamine 5'-phosphate oxidase	--	S	Function unknown	zn 2cys6 transcription factor [Ophiocordyceps sinensis CO18]
OCS_00986	--	--	--	--	--	RNA polymerase II transcription elongation factor	--	S	Function unknown	ELL-associated factor [Ophiocordyceps sinensis CO18]
OCS_05600	--	--	Molecular Function: transcription factor activity, sequence-specific DNA binding (GO:0003700);; Biological Process: regulation of transcription, DNA-templated (GO:0006355);; Molecular Function: sequence-specific DNA binding (GO:0043565);;	--	--	bZIP transcription factor;; bZIP Maf transcription factor	Fluconazole resistance protein 3 OS=Candida albicans OX=5476 GN=FCR3 PE=3 SV=1	K	Transcription	bZIP transcription factor (Fcr3) [Ophiocordyceps sinensis CO18]
OCS_03537	--	--	Cellular Component: integral component of membrane (GO:0016021);; Biological Process: transmembrane transport (GO:0055085);;	--	--	Major Facilitator Superfamily;; MFS/sugar transport protein	Fujikurins efflux protein FFUJ_12242 OS=Gibberella fujikuroi (strain CBS 195.34 / IMI 58289 / NRRL A-6831) OX=1279085 GN=FFUJ_12242 PE=2 SV=1	G	Carbohydrate transport and metabolism	major facilitator superfamily transporter [Ophiocordyceps sinensis CO18]
Ophiocordyceps_sinensis_newGene_2532	[S]	Function unknown	--	--	--	--	--	S	Function unknown	regulatory P domain-containing protein [Purpureocillium lilacinum]
OCS_01256	[G]	Carbohydrate transport and metabolism	Biological Process: carbohydrate metabolic process (GO:0005975);; Biological Process: dephosphorylation (GO:0016311);; Molecular Function: fructose 1,6-bisphosphate 1-phosphatase activity (GO:0042132);;	K03841|0|maw:MAC_09839|K03841 fructose-1,6-bisphosphatase I [EC:3.1.3.11] | (RefSeq) fructose-1,6-bisphosphatase	Glycolysis / Gluconeogenesis (ko00010);; Pentose phosphate pathway (ko00030);; Fructose and mannose metabolism (ko00051);; Methane metabolism (ko00680);; Biosynthesis of antibiotics (ko01130);; Carbon metabolism (ko01200)	Fructose-1-6-bisphosphatase, N-terminal domain	Fructose-1,6-bisphosphatase OS=Kluyveromyces lactis (strain ATCC 8585 / CBS 2359 / DSM 70799 / NBRC 1267 / NRRL Y-1140 / WM37) OX=284590 GN=FBP1 PE=3 SV=2	G	Carbohydrate transport and metabolism	Fructose-1,6-bisphosphatase class 1/Sedoheputulose-1,7-bisphosphatase [Ophiocordyceps sinensis CO18]
OCS_01286	--	--	Biological Process: regulation of transcription, DNA-templated (GO:0006355);; Molecular Function: metal ion binding (GO:0046872);;	--	--	--	--	S	Function unknown	Transcription factor, fungi [Ophiocordyceps sinensis CO18]
OCS_05247	[Q]	Secondary metabolites biosynthesis, transport and catabolism	Molecular Function: oxidoreductase activity (GO:0016491);; Molecular Function: phosphopantetheine binding (GO:0031177);; Biological Process: oxidation-reduction process (GO:0055114);;	--	--	KR domain;; Methyltransferase domain;; Zinc-binding dehydrogenase;; Zinc-binding dehydrogenase;; Methyltransferase domain;; Methyltransferase domain;; Methyltransferase domain;; Methyltransferase domain;; Phosphopantetheine attachment site;; ubiE/COQ5 methyltransferase family;; short chain dehydrogenase;; Nodulation protein S (NodS)	Highly reducing polyketide synthase FUM1 OS=Gibberella moniliformis (strain M3125 / FGSC 7600) OX=334819 GN=FUM1 PE=2 SV=1	Q	Secondary metabolites biosynthesis, transport and catabolism	Beta-ketoacyl synthase [Ophiocordyceps sinensis CO18]
Ophiocordyceps_sinensis_newGene_674	[L]	Replication, recombination and repair	Molecular Function: nucleic acid binding (GO:0003676);; Molecular Function: RNA-DNA hybrid ribonuclease activity (GO:0004523);; Molecular Function: protein kinase activity (GO:0004672);; Biological Process: phosphorylation (GO:0016310);; Biological Process: RNA phosphodiester bond hydrolysis, endonucleolytic (GO:0090502);;	K03469|3.56598e-82|maj:MAA_00386|K03469 ribonuclease HI [EC:3.1.26.4] | (RefSeq) Ribonuclease H domain protein	DNA replication (ko03030)	Protein kinase domain;; Lipopolysaccharide kinase (Kdo/WaaP) family;; Phosphotransferase enzyme family;; Protein tyrosine kinase;; RNase H	Serine/threonine-protein kinase PSK1 OS=Saccharomyces cerevisiae (strain ATCC 204508 / S288c) OX=559292 GN=PSK1 PE=1 SV=2	T	Signal transduction mechanisms	hypothetical protein HIM_12087 [Hirsutella minnesotensis 3608]
Ophiocordyceps_sinensis_newGene_1349	--	--	--	--	--	--	--	S	Function unknown	Hsp70 family chaperone [Cordyceps militaris]
OCS_01138	--	--	Cellular Component: integral component of membrane (GO:0016021);;	--	--	--	--	S	Function unknown	hypothetical protein OCS_01138 [Ophiocordyceps sinensis CO18]
OCS_00962	--	--	Cellular Component: nucleus (GO:0005634);; Cellular Component: mitochondrial intermembrane space (GO:0005758);; Cellular Component: cytosol (GO:0005829);; Cellular Component: integral component of mitochondrial inner membrane (GO:0031305);; Biological Process: mitochondrial respiratory chain complex IV assembly (GO:0033617);;	K18178|2.81666e-70|maw:MAC_04853|K18178 cytochrome c oxidase assembly factor 5 | (RefSeq) cytochrome c oxidase assembly protein (Pet191), putative	--	Cytochrome c oxidase assembly protein PET191	Mitochondrial protein PET191 OS=Saccharomyces cerevisiae (strain ATCC 204508 / S288c) OX=559292 GN=PET191 PE=1 SV=1	O	Posttranslational modification, protein turnover, chaperones	Cytochrome c oxidase assembly protein [Ophiocordyceps sinensis CO18]
Ophiocordyceps_sinensis_newGene_3684	--	--	--	--	--	Phosphotransferase enzyme family;; Lipopolysaccharide kinase (Kdo/WaaP) family	--	S	Function unknown	hypothetical protein NECHADRAFT_55320 [[Nectria] haematococca mpVI 77-13-4]
OCS_02608	--	--	--	--	--	Sucrase/ferredoxin-like	--	O	Posttranslational modification, protein turnover, chaperones	FMI1 protein [Ophiocordyceps sinensis CO18]
Ophiocordyceps_sinensis_newGene_2567	--	--	--	--	--	--	--	--	--	hypothetical protein OCS_06059 [Ophiocordyceps sinensis CO18]
Ophiocordyceps_sinensis_newGene_264	--	--	--	--	--	--	--	--	--	hypothetical protein HIM_11213 [Hirsutella minnesotensis 3608]
OCS_06177	--	--	Biological Process: metabolic process (GO:0008152);; Cellular Component: integral component of membrane (GO:0016021);; Molecular Function: hydrolase activity (GO:0016787);;	--	--	alpha/beta hydrolase fold	--	I	Lipid transport and metabolism	hormone-sensitive lipase [Ophiocordyceps sinensis CO18]
OCS_04699	--	--	--	--	--	--	--	S	Function unknown	hypothetical protein OCS_04699 [Ophiocordyceps sinensis CO18]
Ophiocordyceps_sinensis_newGene_896	--	--	Cellular Component: integral component of membrane (GO:0016021);;	--	--	--	--	--	--	polyprotein [Ophiocordyceps sinensis CO18]
OCS_00335	--	--	--	--	--	--	--	S	Function unknown	hypothetical protein OCS_00335 [Ophiocordyceps sinensis CO18]
OCS_01283	[I]	Lipid transport and metabolism	Cellular Component: peroxisome (GO:0005777);; Biological Process: fatty acid beta-oxidation (GO:0006635);; Biological Process: acyl-CoA metabolic process (GO:0006637);; Molecular Function: isomerase activity (GO:0016853);; Molecular Function: acyl-CoA hydrolase activity (GO:0047617);;	--	--	Thioesterase-like superfamily;; Acyl-CoA thioesterase	--	I	Lipid transport and metabolism	Acyl-CoA thioesterase [Ophiocordyceps sinensis CO18]
OCS_06692	[IQR]	Lipid transport and metabolism;; Secondary metabolites biosynthesis, transport and catabolism;; General function prediction only	Molecular Function: oxidoreductase activity (GO:0016491);; Biological Process: oxidation-reduction process (GO:0055114);;	K14729|0|fpu:FPSE_05924|K14729 multifunctional beta-oxidation protein [EC:4.2.1.- 1.1.1.-] | (RefSeq) hypothetical protein	--	short chain dehydrogenase;; Enoyl-(Acyl carrier protein) reductase;; KR domain;; Tetrahydrofolate dehydrogenase/cyclohydrolase, NAD(P)-binding domain	Peroxisomal hydratase-dehydrogenase-epimerase OS=Neurospora crassa (strain ATCC 24698 / 74-OR23-1A / CBS 708.71 / DSM 1257 / FGSC 987) OX=367110 GN=fox-2 PE=1 SV=1	I	Lipid transport and metabolism	short chain dehydrogenase [Ophiocordyceps sinensis CO18]
OCS_00492	--	--	Molecular Function: monooxygenase activity (GO:0004497);; Cellular Component: integral component of membrane (GO:0016021);; Biological Process: oxidation-reduction process (GO:0055114);;	--	--	--	--	S	Function unknown	flavin-binding monooxygenase-like protein [Ophiocordyceps sinensis CO18]
Ophiocordyceps_sinensis_newGene_3333	--	--	Molecular Function: arginase activity (GO:0004053);; Biological Process: arginine metabolic process (GO:0006525);; Molecular Function: metal ion binding (GO:0046872);;	K01476|5.07161e-16|maw:MAC_01928|K01476 arginase [EC:3.5.3.1] | (RefSeq) Arginase	Arginine biosynthesis (ko00220);; Arginine and proline metabolism (ko00330);; Biosynthesis of antibiotics (ko01130);; Biosynthesis of amino acids (ko01230)	--	Arginase OS=Neurospora crassa (strain ATCC 24698 / 74-OR23-1A / CBS 708.71 / DSM 1257 / FGSC 987) OX=367110 GN=aga-1 PE=1 SV=3	E	Amino acid transport and metabolism	Arginase [Hirsutella minnesotensis 3608]
OCS_03105	--	--	Molecular Function: metal ion binding (GO:0046872);;	--	--	--	--	S	Function unknown	PHD-finger domain-containing protein [Ophiocordyceps sinensis CO18]
OCS_06651	--	--	--	--	--	--	--	S	Function unknown	N-terminal fungal transcription regulatory domain-containing protein [Ophiocordyceps sinensis CO18]
OCS_05856	[G]	Carbohydrate transport and metabolism	Molecular Function: hydrolase activity, hydrolyzing O-glycosyl compounds (GO:0004553);; Biological Process: carbohydrate metabolic process (GO:0005975);;	--	--	Glycosyl hydrolases family 35;; Beta-galactosidase, domain 2;; Beta-galactosidase jelly roll domain	Probable beta-galactosidase A OS=Penicillium expansum OX=27334 GN=lacA PE=2 SV=1	G	Carbohydrate transport and metabolism	beta-galactosidase [Ophiocordyceps sinensis CO18]
OCS_02837	--	--	--	--	--	Est1 DNA/RNA binding domain	EST/SMG-like protein 1 OS=Saccharomyces cerevisiae (strain ATCC 204508 / S288c) OX=559292 GN=ESL1 PE=1 SV=1	S	Function unknown	hypothetical protein OCS_02837 [Ophiocordyceps sinensis CO18]
OCS_04271	[S]	Function unknown	Cellular Component: intracellular (GO:0005622);; Biological Process: metabolic process (GO:0008152);; Molecular Function: carbon-sulfur lyase activity (GO:0016846);;	--	--	Glutathione-dependent formaldehyde-activating enzyme	--	S	Function unknown	glutathione-dependent formaldehyde-activating enzyme [Ophiocordyceps sinensis CO18]
OCS_02248	[I]	Lipid transport and metabolism	--	--	--	SCP-2 sterol transfer family;; Alkyl sulfatase C-terminal	Fatty acid-binding protein OS=Yarrowia lipolytica (strain CLIB 122 / E 150) OX=284591 GN=SCP2 PE=1 SV=4	S	Function unknown	putative peroxisomal protein POX18 [Ophiocordyceps sinensis CO18]

## Sheet: S6
Table S5. Results of content determination of fatty acid in samples of O.sinensis (n=3, mg/g)
No.	Type(Methyl)	OSW_S1	OSW_S2	OSW_S3	OSC_S1	OSC_S2	OSC_S3
1	Methyl dodecanoate (C12:0)	2.258±0.008	—	1.64±0.099	1.366±0.299	—	—
2	Methyl myristoleate(C14:1n5)	0.966±0.031	0.389±0.015	0.697±0.092	0.441±0.100	0.459±0.007	0.462±0.056
3	Methyl myristate(C14:0)	0.465±0.005	0.267±0.053	0.076±0.009	0.294±0.036	0.42±0.031	0.147±0.054
4	Methyl palmitate(C16:0)	114.061±1.943	74.007±5.025	73.037±0.484	63.864±2.439	59.685±2.754	49.049±3.595
5	Methyl heptadecanoate(C17:0)	0.277±0.004	0.007±0.026	0.105±0.026	0.203±0.023	0.041±0.014	—
6	Methyl oleate(C18:1n9c)	118.117±1.321	77.536±5.340	57.261±2.813	88.895±2.881	83.41±3.993	71.368±5.520
7	Methyl linoleate(C18:2n6c)	102.283±1.579	63.302±4.603	46.416±2.857	65.187±2.469	64.302±3.770	51.334±4.257
8	Methyl stearate(C18:0)	23.31±0.299	18.35±1.129	14.75±1.418	13.183±0.811	11.823±0.778	8.58±1.176
9	Methyl arachidate(C20:0)	0.296±0.001	0.228±0.025	0.074±0.007	0.096±0.017	0.068±0.010	0.039±0.017
10	Methyl dodecanoate(C22:0)	0.256±0.015	0.072±0.011	0.054±0.015	0.061±0.006	0.08±0.006	0.033±0.009
11	Methyl tricosanoate(C23:0)	0.518±0.009	—	—	0.050±	0.017±0.000	—
	Unsaturated fatty acid content	362.802	197.709	230.425	233.59	220.304	181.011
	Saturated fatty acid content	221.367	104.374	141.227	154.523	148.171	123.164
"—" : below the detection line
