# Supplementary material for: Comparative analysis of fatty acid metabolism based on transcriptome sequencing of wild and cultivated Ophiocordyceps sinensis
Source: PeerJ. 2021 Jul 1;9:e11681. doi: 10.7717/peerj.11681 (PMC8255070; doi:10.7717/peerj.11681)
Supplement: Supplemental Information 5 [file peerj-09-11681-s005.xlsx]

## Sheet: Sheet1
Wild	Sample_name	Gene_ID	Ct	Cultivated	Sample_name	Gene_ID	Ct		Summary
round 1	W1	OCS_06093	20.88		C1	OCS_06093	22.23		Gene ID	Log2FC	Log2(2-dd-Ct)	STDEV
	W1	OCS_06093	21.14		C1	OCS_06093	21.86		OCS_05937	-9.34	-2.04667	0.126178
	W1	OCS_06093	20.81		C1	OCS_06093	21.94		OCS_06122	-4.319	-6.51	0.00539065
	W2	OCS_04188	25.94		C2	OCS_04188	26.82		OCS_00482	-3.87439	-4.98667	0.013158
	W2	OCS_04188	25.26		C2	OCS_04188	26.5		OCS_06093	-3.85668	-3.33	0.0557003
	W2	OCS_04188	25.23		C2	OCS_04188	26.7		OCS_04188	-3.29	-3.46	0.0484148
	W3	OCS_02882	23.49		C3	OCS_02882	23.94		OCS_02882	-6.571	-2.69	0.0951844
	W3	OCS_02882	23.08		C3	OCS_02882	23.5		OCS_04932	-3.378	-2.25667	0.0770133
	W3	OCS_02882	23.01		C3	OCS_02882	23.43		OCS_02728	-2.169	-5.16667	0.00539065
	W4	OCS_05937	18.54		C4	OCS_05937	18.54		OCS_06591	-2.44	-2.855	0.0218933
	W4	OCS_05937	18.5		C4	OCS_05937	18.5		OCS_01242	-2.419	-1.09	0.0989512
	W4	OCS_05937	18.56		C4	OCS_05937	18.56		OCS_00172	2.15	1.14667	0.133937
	W5	OCS_04932	23.75		C5	OCS_04932	23.48		OCS_03760	4.55	1.87	0.8616
	W5	OCS_04932	23.62		C5	OCS_04932	23.65
	W5	OCS_04932	23.77		C5	OCS_04932	23.99
	W6	OCS_03760	22.53		C6	OCS_03760	18.5
	W6	OCS_03760	23.07		C6	OCS_03760	18.8
	W6	OCS_03760	22.7		C6	OCS_03760	18.6
	W7	OCS_02728	27.41		C7	OCS_02728	31.04
	W7	OCS_02728	27.52		C7	OCS_02728	30.4
	W7	OCS_02728	27.99		C7	OCS_02728	30.19
	W8	OCS_06122	24.45		C8	OCS_06122	28.02
	W8	OCS_06122	23.98		C8	OCS_06122	28.04
	W8	OCS_06122	23.53		C8	OCS_06122	28.64
	W9	OCS_00482	21.9		C9	OCS_00482	24.61
	W9	OCS_00482	21.86		C9	OCS_00482	24.53
	W9	OCS_00482	21.91		C9	OCS_00482	24.7
	W_actin	β-actin	22.98		C_actin	β-actin	20.19
	W_actin	β-actin	22.81		C_actin	β-actin	21.1
	W_actin	β-actin	22.91		C_actin	β-actin	20.62
round 2	W10	OCS_00172	19.63		C10	OCS_00172	17.8
	W10	OCS_00172	19.82		C10	OCS_00172	17.56
	W10	OCS_00172	20.26		C10	OCS_00172	17.51
	W11	OCS_01242	21.62		C11	OCS_01242	22.32
	W11	OCS_01242	21.92		C11	OCS_01242	22.25
	W11	OCS_01242	21.99		C11	OCS_01242	22.65
	W12	OCS_06591	21.97		C12	OCS_06591	23.9
	W12	OCS_06591	22.1		C12	OCS_06591	24.12
	W12	OCS_06591	21.71		C12	OCS_06591	24.14
	W_actin	β-actin	20.79		C_actin	β-actin	19.58
	W_actin	β-actin	20.69		C_actin	β-actin	19.79
	W_actin	β-actin	20.31		C_actin	β-actin	19.53
